# Supplementary material for: Utility Approaches to Evaluating the Effectiveness of Consumer Confidence Reports
Source: Preprints.org preprint supplement (doi:10.20944/preprints201901.0254.v1), 2019-01-25
Supplement: Supplementary file 2 [file supplementary]

## Sheet: Data Cover Sheet
	Owner of Dataset	American Water Works Association
	Authors	Jessica Evans (evansjc@iu.edu, ORCID 0000-0002-9200-2948)
		Adam T Carpenter (acarpenter@awwa.org, ORCID 0000-0002-9688-8088)
	Copyright and Licensing	Copyright 2018 American Water Works Association.
		This data is licensed under a Creative Commons Attribution 4.0 License.
	Description of Data	This dataset contains responses to a survey sent to AWWA member utilities (primarily drinking water utilities, but many combined water-wastewater systems and those offering other services alongside drinking water) from June 25 to July 23, 2018. There are 240 responses representing a cumulative population served of over 48 million customers. A series of questions (described on following tab) discu…
	Important Note	No private member data from AWWA systems is contained within this dataset. The data within this dataset were voluntarily provided by utilities (primarily AWWA members at the time of distribution, given the distribution method) in a survey, with the agreement that identifying information would not be shared. Therefore, the following information has been removed from the public data set: Utility na…

## Sheet: Survey Questions
	Note: Click on the embedded PDF below to view all of the survey questions

## Sheet: Survey Results
	Please indicate the approximate number of customers served by your utility for which you provide the Consumer Confidence Report (CCR) or annual water quality report to the public (including both paper and electronically). Do not include consecutive system / wholesale consumers if you do not provide the CCR to the public in those areas.	How does your utility track consumer engagement or understanding of the CCR/ annual water quality report? Please select all that apply.						How does your utility track consumer perceptions about their water quality or the effect the CCR/annual water quality report has on consumer confidence in their water quality? Please select all that apply.						Does your utility use any methods to understand what information consumers would like in their CCR/ annual water quality report? Please select all that apply.					Does your utility change or conduct testing on differences in the language, format, or other aspects of your CCR/ annual water quality report to increase consumer understanding or engagement? Please select all that apply.								How does your utility conduct publicity outreach regarding your CCR/ annual water quality report to increase consumer engagement, understanding of information, or perceptions about water quality? Please select all that apply.							What information do you include on your utility website regarding the CCR/ annual water quality report? Please select all that apply.							Has your utility used electronic delivery for some or all of your consumer confidence reports/ water quality reports?	Has your utility added information or changed aspects of the CCR/ annual water quality report that were not included in years where it was delivered on paper because of space, weight, or other limitations?			How has your utility tracked or conducted testing on whether electronic delivery of the consumer confidence report/ water quality report has changed consumer feedback, understanding, or perceptions about water quality based on information in the eCCR? Please select all that apply.
Region	Customers served	Record the number of inquiries or comments received about the CCR/annual water quality report	Record the content of inquiries or comments received about the CCR/annual water quality report	Conduct consumer surveys or other methods that evaluate whether consumers feel they understand the information in the CCR/ annual water quality report	Other (please describe below)	We do not track consumer engagement or understanding on the CCR/ annual water quality report	Please describe your “Other” selection and/ or elaborate on another selected answer.	Conduct consumer surveys or other methods evaluating consumer confidence in their water quality	Conduct consumer surveys or other methods evaluating specific consumer concerns about their water quality	Conduct consumer surveys or other methods that evaluate the effect of the CCR/ annual water quality report on consumer confidence	Other (please describe below)	We do not track consumer perceptions on their water quality or the effect of the CCR/ annual water quality report	Please describe your “Other” selection and/ or elaborate on another selected answer.	We conduct methods, such as surveys or polls, that directly ask consumers what information they would like in their CCR/ annual water quality report	We address questions or concerns we have received from consumers	Other (please describe below)	We do not use any methods to understand what information consumers would like in their CCR/ annual water quality report	Please describe your “Other” selection and/ or elaborate on another selected answer.	Change language/wording where applicable	Change format of information (e.g. placement in the report, bulleted items vs. paragraph)	Change format of figures or pictures (e.g. placement in the report, report includes pictures and diagrams vs. includes only text)	Change the amount or type of information that is included in the CCR/annual water quality report	Conduct testing on differences in at least one of these aspects of the CCR/ annual water quality report	Other (please describe below)	We do not test on the language, format, or other aspects of the CCR/ annual water quality report	Please describe your “Other” selection and/ or elaborate on another selected answer.	Newsletters (electronic or hard copy) to consumers	Information about the CCR is available on our utility’s website	Announcements to local media outlets like newspapers, radio, or television stations	Social media announcements	Other (please describe below)	We do not conduct publicity outreach regarding our CCR/ annual water quality report	Please describe your “Other” selection and/ or elaborate on another selected answer.	Summary or explanation about information in the CCR	Contact information for the utility	Link(s) to EPA or CDC Consumer Confidence Report information	Electronic copy of the CCR	Electronic copy of the CCR in a non-English language	Other (please describe below)	Please describe your “Other” selection and/ or elaborate on another selected answer.	Response	Not this year, but we plan to in the future	No, and we do not plan to in the future	Yes (please describe)	We have conducted consumer surveys	We have tracked the number of times the report has been accessed	Other (please describe below)	We have not tracked or conducted testing on whether electronic delivery has changed consumer feedback, understanding, or perceptions about water quality information in the eCCR	Please describe your “Other” selection and/ or elaborate on another selected answer.
Midwest (Region 2)	810	Record the number of inquiries or comments received about the CCR/annual water quality report										We do not track consumer perceptions on their water quality or the effect of the CCR/ annual water quality report			We address questions or concerns we have received from consumers										We do not test on the language, format, or other aspects of the CCR/ annual water quality report			Information about the CCR is available on our utility’s website						Summary or explanation about information in the CCR			Electronic copy of the CCR	Electronic copy of the CCR in a non-English language			Yes, we have used electronic delivery for some or all of our consumer confidence reports/ water quality reports		No, and we do not plan to in the future					We have not tracked or conducted testing on whether electronic delivery has changed consumer feedback, understanding, or perceptions about water quality information in the eCCR
Midwest (Region 2)	1800					We do not track consumer engagement or understanding on the CCR/ annual water quality report						We do not track consumer perceptions on their water quality or the effect of the CCR/ annual water quality report			We address questions or concerns we have received from consumers										We do not test on the language, format, or other aspects of the CCR/ annual water quality report			Information about the CCR is available on our utility’s website		Social media announcements				Summary or explanation about information in the CCR	Contact information for the utility	Link(s) to EPA or CDC Consumer Confidence Report information	Electronic copy of the CCR				Yes, we have used electronic delivery for some or all of our consumer confidence reports/ water quality reports		No, and we do not plan to in the future					We have not tracked or conducted testing on whether electronic delivery has changed consumer feedback, understanding, or perceptions about water quality information in the eCCR
Midwest (Region 2)	6500					We do not track consumer engagement or understanding on the CCR/ annual water quality report						We do not track consumer perceptions on their water quality or the effect of the CCR/ annual water quality report					We do not use any methods to understand what information consumers would like in their CCR/ annual water quality report		Change language/wording where applicable	Change format of information (e.g. placement in the report, bulleted items vs. paragraph)	Change format of figures or pictures (e.g. placement in the report, report includes pictures and diagrams vs. includes only text)	Change the amount or type of information that is included in the CCR/annual water quality report						Information about the CCR is available on our utility’s website			Other (please describe below)		We mail a postcard to consumers notifying them that the CCR is available on our website and include a link to the webpage. We also post in public areas, such as City Hall and libraries.	Summary or explanation about information in the CCR	Contact information for the utility	Link(s) to EPA or CDC Consumer Confidence Report information	Electronic copy of the CCR				Yes, we have used electronic delivery for some or all of our consumer confidence reports/ water quality reports			We have added language about how to protect our source water and have added more pictures and spaced out the text more so that it is more visually appealing.				We have not tracked or conducted testing on whether electronic delivery has changed consumer feedback, understanding, or perceptions about water quality information in the eCCR
Midwest (Region 2)	9000	Record the number of inquiries or comments received about the CCR/annual water quality report										We do not track consumer perceptions on their water quality or the effect of the CCR/ annual water quality report					We do not use any methods to understand what information consumers would like in their CCR/ annual water quality report								We do not test on the language, format, or other aspects of the CCR/ annual water quality report							We do not conduct publicity outreach regarding our CCR/ annual water quality report		Summary or explanation about information in the CCR	Contact information for the utility	Link(s) to EPA or CDC Consumer Confidence Report information	Electronic copy of the CCR				Yes, we have used electronic delivery for some or all of our consumer confidence reports/ water quality reports		No, and we do not plan to in the future					We have not tracked or conducted testing on whether electronic delivery has changed consumer feedback, understanding, or perceptions about water quality information in the eCCR
Midwest (Region 2)	12000					We do not track consumer engagement or understanding on the CCR/ annual water quality report						We do not track consumer perceptions on their water quality or the effect of the CCR/ annual water quality report			We address questions or concerns we have received from consumers										We do not test on the language, format, or other aspects of the CCR/ annual water quality report		Newsletters (electronic or hard copy) to consumers	Information about the CCR is available on our utility’s website		Social media announcements				Summary or explanation about information in the CCR	Contact information for the utility		Electronic copy of the CCR				Yes, we have used electronic delivery for some or all of our consumer confidence reports/ water quality reports		No, and we do not plan to in the future					We have not tracked or conducted testing on whether electronic delivery has changed consumer feedback, understanding, or perceptions about water quality information in the eCCR
Midwest (Region 2)	150000					We do not track consumer engagement or understanding on the CCR/ annual water quality report						We do not track consumer perceptions on their water quality or the effect of the CCR/ annual water quality report					We do not use any methods to understand what information consumers would like in their CCR/ annual water quality report		Change language/wording where applicable	Change format of information (e.g. placement in the report, bulleted items vs. paragraph)		Change the amount or type of information that is included in the CCR/annual water quality report					Newsletters (electronic or hard copy) to consumers	Information about the CCR is available on our utility’s website	Announcements to local media outlets like newspapers, radio, or television stations	Social media announcements				Summary or explanation about information in the CCR	Contact information for the utility	Link(s) to EPA or CDC Consumer Confidence Report information	Electronic copy of the CCR				Yes, we have used electronic delivery for some or all of our consumer confidence reports/ water quality reports		No, and we do not plan to in the future			We have tracked the number of times the report has been accessed
Midwest (Region 2)	1300000	Record the number of inquiries or comments received about the CCR/annual water quality report	Record the content of inquiries or comments received about the CCR/annual water quality report					Conduct consumer surveys or other methods evaluating consumer confidence in their water quality	Conduct consumer surveys or other methods evaluating specific consumer concerns about their water quality					We conduct methods, such as surveys or polls, that directly ask consumers what information they would like in their CCR/ annual water quality report	We address questions or concerns we have received from consumers				Change language/wording where applicable	Change format of information (e.g. placement in the report, bulleted items vs. paragraph)		Change the amount or type of information that is included in the CCR/annual water quality report						Information about the CCR is available on our utility’s website		Social media announcements	Other (please describe below)		Bill messages are ran each month where there is room throughout the year.								Yes, we have used electronic delivery for some or all of our consumer confidence reports/ water quality reports		No, and we do not plan to in the future			We have tracked the number of times the report has been accessed
Midwest (Region 2)	1050					We do not track consumer engagement or understanding on the CCR/ annual water quality report					Other (please describe below)		Customers call us when they have a question.			Other (please describe below)		Most customers are annoyed that we send this report and throw it away.						Other (please describe below)		In the past we have added large font for our aged customers.						We do not conduct publicity outreach regarding our CCR/ annual water quality report		Summary or explanation about information in the CCR	Contact information for the utility	Link(s) to EPA or CDC Consumer Confidence Report information					Yes, we have used electronic delivery for some or all of our consumer confidence reports/ water quality reports	Not this year, but we plan to in the future						We have not tracked or conducted testing on whether electronic delivery has changed consumer feedback, understanding, or perceptions about water quality information in the eCCR
Midwest (Region 2)	3350					We do not track consumer engagement or understanding on the CCR/ annual water quality report						We do not track consumer perceptions on their water quality or the effect of the CCR/ annual water quality report				Other (please describe below)		The CCR is template driven by the [State Regulator]. There is very little latitude as to what is allowed in the report.							We do not test on the language, format, or other aspects of the CCR/ annual water quality report							We do not conduct publicity outreach regarding our CCR/ annual water quality report			Contact information for the utility		Electronic copy of the CCR				Yes, we have used electronic delivery for some or all of our consumer confidence reports/ water quality reports		No, and we do not plan to in the future					We have not tracked or conducted testing on whether electronic delivery has changed consumer feedback, understanding, or perceptions about water quality information in the eCCR	[Utility Name] recognized the very significant savings in postage costs after posting the report on our website.
Midwest (Region 2)	5200					We do not track consumer engagement or understanding on the CCR/ annual water quality report						We do not track consumer perceptions on their water quality or the effect of the CCR/ annual water quality report					We do not use any methods to understand what information consumers would like in their CCR/ annual water quality report								We do not test on the language, format, or other aspects of the CCR/ annual water quality report							We do not conduct publicity outreach regarding our CCR/ annual water quality report			Contact information for the utility		Electronic copy of the CCR				Yes, we have used electronic delivery for some or all of our consumer confidence reports/ water quality reports			We've taken out a lot of the filler because we want to keep to a trifold in size.				We have not tracked or conducted testing on whether electronic delivery has changed consumer feedback, understanding, or perceptions about water quality information in the eCCR
Midwest (Region 2)	14200				Other (please describe below)		Normally they address their questions through the City's website /emails where we our connected and those saved as customers inquires/information.				Other (please describe below)		As stated in the above response, most are not negative more so wanting more information.			Other (please describe below)		yes, we provide information that is given to us through USEPA, [State Regulator]							We do not test on the language, format, or other aspects of the CCR/ annual water quality report							We do not conduct publicity outreach regarding our CCR/ annual water quality report					Electronic copy of the CCR				Yes, we have used electronic delivery for some or all of our consumer confidence reports/ water quality reports		No, and we do not plan to in the future					We have not tracked or conducted testing on whether electronic delivery has changed consumer feedback, understanding, or perceptions about water quality information in the eCCR
Midwest (Region 2)	112000	Record the number of inquiries or comments received about the CCR/annual water quality report	Record the content of inquiries or comments received about the CCR/annual water quality report								Other (please describe below)		We only record and evaluate the comments/questions we get via phone or email by choice of the customer.		We address questions or concerns we have received from consumers				Change language/wording where applicable	Change format of information (e.g. placement in the report, bulleted items vs. paragraph)	Change format of figures or pictures (e.g. placement in the report, report includes pictures and diagrams vs. includes only text)	Change the amount or type of information that is included in the CCR/annual water quality report					Newsletters (electronic or hard copy) to consumers	Information about the CCR is available on our utility’s website		Social media announcements					Contact information for the utility		Electronic copy of the CCR				Yes, we have used electronic delivery for some or all of our consumer confidence reports/ water quality reports			Due to budgetary restraints, we only printed very short, black and white CCRs in the past. Recently, we have decided to make it a higher priority, spending money to include more information and make it more visually appealing. We include things that people ask about regularly and newly introduced information for the public.		We have tracked the number of times the report has been accessed
Midwest (Region 2)	1600					We do not track consumer engagement or understanding on the CCR/ annual water quality report						We do not track consumer perceptions on their water quality or the effect of the CCR/ annual water quality report			We address questions or concerns we have received from consumers					Change format of information (e.g. placement in the report, bulleted items vs. paragraph)								Information about the CCR is available on our utility’s website							Contact information for the utility						Yes, we have used electronic delivery for some or all of our consumer confidence reports/ water quality reports		No, and we do not plan to in the future					We have not tracked or conducted testing on whether electronic delivery has changed consumer feedback, understanding, or perceptions about water quality information in the eCCR
Midwest (Region 2)	4000	Record the number of inquiries or comments received about the CCR/annual water quality report										We do not track consumer perceptions on their water quality or the effect of the CCR/ annual water quality report			We address questions or concerns we have received from consumers										We do not test on the language, format, or other aspects of the CCR/ annual water quality report		Newsletters (electronic or hard copy) to consumers	Information about the CCR is available on our utility’s website			Other (please describe below)		On the water bill we publicize the website with the CCR.	Summary or explanation about information in the CCR	Contact information for the utility		Electronic copy of the CCR				Yes, we have used electronic delivery for some or all of our consumer confidence reports/ water quality reports		No, and we do not plan to in the future					We have not tracked or conducted testing on whether electronic delivery has changed consumer feedback, understanding, or perceptions about water quality information in the eCCR
Midwest (Region 2)	7000					We do not track consumer engagement or understanding on the CCR/ annual water quality report						We do not track consumer perceptions on their water quality or the effect of the CCR/ annual water quality report													We do not test on the language, format, or other aspects of the CCR/ annual water quality report							We do not conduct publicity outreach regarding our CCR/ annual water quality report					Electronic copy of the CCR				Yes, we have used electronic delivery for some or all of our consumer confidence reports/ water quality reports		No, and we do not plan to in the future					We have not tracked or conducted testing on whether electronic delivery has changed consumer feedback, understanding, or perceptions about water quality information in the eCCR
Midwest (Region 2)	12000					We do not track consumer engagement or understanding on the CCR/ annual water quality report						We do not track consumer perceptions on their water quality or the effect of the CCR/ annual water quality report					We do not use any methods to understand what information consumers would like in their CCR/ annual water quality report								We do not test on the language, format, or other aspects of the CCR/ annual water quality report							We do not conduct publicity outreach regarding our CCR/ annual water quality report					Electronic copy of the CCR				Yes, we have used electronic delivery for some or all of our consumer confidence reports/ water quality reports		No, and we do not plan to in the future					We have not tracked or conducted testing on whether electronic delivery has changed consumer feedback, understanding, or perceptions about water quality information in the eCCR
Midwest (Region 2)	66000	Record the number of inquiries or comments received about the CCR/annual water quality report	Record the content of inquiries or comments received about the CCR/annual water quality report				We use our CCR as a portion of our more general plant brochure, which we hand out at various marketing events throughout the year. We informally track the nature of comments/questions received at those events.		Conduct consumer surveys or other methods evaluating specific consumer concerns about their water quality						We address questions or concerns we have received from consumers										We do not test on the language, format, or other aspects of the CCR/ annual water quality report		Newsletters (electronic or hard copy) to consumers	Information about the CCR is available on our utility’s website	Announcements to local media outlets like newspapers, radio, or television stations	Social media announcements	Other (please describe below)		Printed links included on utility bills; direct email to [University] students living in residence halls and Greek houses.	Summary or explanation about information in the CCR	Contact information for the utility	Link(s) to EPA or CDC Consumer Confidence Report information	Electronic copy of the CCR				Yes, we have used electronic delivery for some or all of our consumer confidence reports/ water quality reports		No, and we do not plan to in the future			We have tracked the number of times the report has been accessed
Midwest (Region 2)	250000					We do not track consumer engagement or understanding on the CCR/ annual water quality report						We do not track consumer perceptions on their water quality or the effect of the CCR/ annual water quality report			We address questions or concerns we have received from consumers										We do not test on the language, format, or other aspects of the CCR/ annual water quality report		Newsletters (electronic or hard copy) to consumers	Information about the CCR is available on our utility’s website		Social media announcements				Summary or explanation about information in the CCR	Contact information for the utility		Electronic copy of the CCR				Yes, we have used electronic delivery for some or all of our consumer confidence reports/ water quality reports			photo and explanation of the treatment process and water sources.				We have not tracked or conducted testing on whether electronic delivery has changed consumer feedback, understanding, or perceptions about water quality information in the eCCR
Midwest (Region 2)	430000				Other (please describe below)		We track analytics for web traffic to the page that the CCR is available on.	Conduct consumer surveys or other methods evaluating consumer confidence in their water quality	Conduct consumer surveys or other methods evaluating specific consumer concerns about their water quality						We address questions or concerns we have received from consumers				Change language/wording where applicable	Change format of information (e.g. placement in the report, bulleted items vs. paragraph)	Change format of figures or pictures (e.g. placement in the report, report includes pictures and diagrams vs. includes only text)	Change the amount or type of information that is included in the CCR/annual water quality report					Newsletters (electronic or hard copy) to consumers	Information about the CCR is available on our utility’s website	Announcements to local media outlets like newspapers, radio, or television stations	Social media announcements	Other (please describe below)		Letters are sent to owners of multi-family/apartment properties requesting they inform their residents about the CCR's availability. News releases regarding the CCR are issued directly to officials at the county, cities, and local chamber of commerce's in our service area.	Summary or explanation about information in the CCR	Contact information for the utility		Electronic copy of the CCR				Yes, we have used electronic delivery for some or all of our consumer confidence reports/ water quality reports		No, and we do not plan to in the future		We have conducted consumer surveys	We have tracked the number of times the report has been accessed
Midwest (Region 2)	1630		Record the content of inquiries or comments received about the CCR/annual water quality report									We do not track consumer perceptions on their water quality or the effect of the CCR/ annual water quality report			We address questions or concerns we have received from consumers										We do not test on the language, format, or other aspects of the CCR/ annual water quality report			Information about the CCR is available on our utility’s website		Social media announcements				Summary or explanation about information in the CCR	Contact information for the utility	Link(s) to EPA or CDC Consumer Confidence Report information	Electronic copy of the CCR				Yes, we have used electronic delivery for some or all of our consumer confidence reports/ water quality reports		No, and we do not plan to in the future					We have not tracked or conducted testing on whether electronic delivery has changed consumer feedback, understanding, or perceptions about water quality information in the eCCR	However, we do have calls and respond personally to those calls.
Midwest (Region 2)	9489					We do not track consumer engagement or understanding on the CCR/ annual water quality report						We do not track consumer perceptions on their water quality or the effect of the CCR/ annual water quality report			We address questions or concerns we have received from consumers					Change format of information (e.g. placement in the report, bulleted items vs. paragraph)	Change format of figures or pictures (e.g. placement in the report, report includes pictures and diagrams vs. includes only text)							Information about the CCR is available on our utility’s website		Social media announcements	Other (please describe below)		We publish availability on Facebook, Twitter, Website and postcards sent to citizens.		Contact information for the utility		Electronic copy of the CCR				Yes, we have used electronic delivery for some or all of our consumer confidence reports/ water quality reports		No, and we do not plan to in the future					We have not tracked or conducted testing on whether electronic delivery has changed consumer feedback, understanding, or perceptions about water quality information in the eCCR
Midwest (Region 2)	10100					We do not track consumer engagement or understanding on the CCR/ annual water quality report						We do not track consumer perceptions on their water quality or the effect of the CCR/ annual water quality report					We do not use any methods to understand what information consumers would like in their CCR/ annual water quality report								We do not test on the language, format, or other aspects of the CCR/ annual water quality report			Information about the CCR is available on our utility’s website						Summary or explanation about information in the CCR	Contact information for the utility	Link(s) to EPA or CDC Consumer Confidence Report information	Electronic copy of the CCR				Yes, we have used electronic delivery for some or all of our consumer confidence reports/ water quality reports		No, and we do not plan to in the future					We have not tracked or conducted testing on whether electronic delivery has changed consumer feedback, understanding, or perceptions about water quality information in the eCCR
Midwest (Region 2)	13000				Other (please describe below)		Google Analytics	Conduct consumer surveys or other methods evaluating consumer confidence in their water quality									We do not use any methods to understand what information consumers would like in their CCR/ annual water quality report		Change language/wording where applicable	Change format of information (e.g. placement in the report, bulleted items vs. paragraph)	Change format of figures or pictures (e.g. placement in the report, report includes pictures and diagrams vs. includes only text)	Change the amount or type of information that is included in the CCR/annual water quality report				This past year we kept it at a minimum, but in the past we have used a variety of ways.		Information about the CCR is available on our utility’s website			Other (please describe below)		Bill stuffers to water customers with a direct link to the report	Summary or explanation about information in the CCR	Contact information for the utility	Link(s) to EPA or CDC Consumer Confidence Report information	Electronic copy of the CCR		Other (please describe below)	Non-English is available if requested.	Yes, we have used electronic delivery for some or all of our consumer confidence reports/ water quality reports
Midwest (Region 2)	37000	Record the number of inquiries or comments received about the CCR/annual water quality report	Record the content of inquiries or comments received about the CCR/annual water quality report									We do not track consumer perceptions on their water quality or the effect of the CCR/ annual water quality report			We address questions or concerns we have received from consumers		We do not use any methods to understand what information consumers would like in their CCR/ annual water quality report		Change language/wording where applicable						We do not test on the language, format, or other aspects of the CCR/ annual water quality report					Social media announcements		We do not conduct publicity outreach regarding our CCR/ annual water quality report			Contact information for the utility		Electronic copy of the CCR				Yes, we have used electronic delivery for some or all of our consumer confidence reports/ water quality reports		No, and we do not plan to in the future					We have not tracked or conducted testing on whether electronic delivery has changed consumer feedback, understanding, or perceptions about water quality information in the eCCR
Midwest (Region 2)	49000					We do not track consumer engagement or understanding on the CCR/ annual water quality report						We do not track consumer perceptions on their water quality or the effect of the CCR/ annual water quality report					We do not use any methods to understand what information consumers would like in their CCR/ annual water quality report								We do not test on the language, format, or other aspects of the CCR/ annual water quality report							We do not conduct publicity outreach regarding our CCR/ annual water quality report			Contact information for the utility		Electronic copy of the CCR				Yes, we have used electronic delivery for some or all of our consumer confidence reports/ water quality reports		No, and we do not plan to in the future					We have not tracked or conducted testing on whether electronic delivery has changed consumer feedback, understanding, or perceptions about water quality information in the eCCR
Midwest (Region 2)	650000					We do not track consumer engagement or understanding on the CCR/ annual water quality report	[Utility Name] prepares the tables for our member communities (wholesale customers) because we do many of their analyses. Each member community prepares their own CCR excepting one community in which we prepare their CCR for them, but they add items and as they see fit.					We do not track consumer perceptions on their water quality or the effect of the CCR/ annual water quality report	[Utility Name] prepares the tables for our member communities (wholesale customers) because we do many of their analyses. Each member community prepares their own CCR excepting one community in which we prepare their CCR for them, but they add items and as they see fit.		We address questions or concerns we have received from consumers			[Utility Name] has a service contract with the [City] to prepare their CCR and to perform all their compliance monitoring. [Utility Name] addresses all of our wholesale customer's and [City's] retail customers when they call with questions, but we do not formally track their concerns. We do provide annual mineral information and additional information to each wholesale community member, but they …	Change language/wording where applicable	Change format of information (e.g. placement in the report, bulleted items vs. paragraph)	Change format of figures or pictures (e.g. placement in the report, report includes pictures and diagrams vs. includes only text)					[Utility] does provide some guidance to our member communities, but ultimately, each wholesale customer is responsible for their own CCR and many provide alternate languages to meet their community's diversity.					Other (please describe below)		[Utility Name] provides technical information directly to our member community retail customers via our website, however, it is generally our wholesale customer outreach program that provides communications to our wholesale customers and our wholesale customers in turn provide information to their retail customers.			Link(s) to EPA or CDC Consumer Confidence Report information					Yes, we have used electronic delivery for some or all of our consumer confidence reports/ water quality reports		No, and we do not plan to in the future					We have not tracked or conducted testing on whether electronic delivery has changed consumer feedback, understanding, or perceptions about water quality information in the eCCR	[Utility Name]
Midwest (Region 2)	4402					We do not track consumer engagement or understanding on the CCR/ annual water quality report						We do not track consumer perceptions on their water quality or the effect of the CCR/ annual water quality report					We do not use any methods to understand what information consumers would like in their CCR/ annual water quality report		Change language/wording where applicable													We do not conduct publicity outreach regarding our CCR/ annual water quality report					Electronic copy of the CCR				Yes, we have used electronic delivery for some or all of our consumer confidence reports/ water quality reports		No, and we do not plan to in the future					We have not tracked or conducted testing on whether electronic delivery has changed consumer feedback, understanding, or perceptions about water quality information in the eCCR
Midwest (Region 2)	66000	Record the number of inquiries or comments received about the CCR/annual water quality report										We do not track consumer perceptions on their water quality or the effect of the CCR/ annual water quality report			We address questions or concerns we have received from consumers				Change language/wording where applicable		Change format of figures or pictures (e.g. placement in the report, report includes pictures and diagrams vs. includes only text)					The City puts the CCR into a format that is plain language and easier to understand to for the general public. it is a clear and concise format that explains parameters and where more information can be found.	Newsletters (electronic or hard copy) to consumers	Information about the CCR is available on our utility’s website			Other (please describe below)		Newsletters mailed to every residence in the City as well as postcards have been used to direct customers to the online CCR.	Summary or explanation about information in the CCR	Contact information for the utility		Electronic copy of the CCR				Yes, we have used electronic delivery for some or all of our consumer confidence reports/ water quality reports	Not this year, but we plan to in the future						We have not tracked or conducted testing on whether electronic delivery has changed consumer feedback, understanding, or perceptions about water quality information in the eCCR
Midwest (Region 2)	400000				Other (please describe below)		Track the number of hits on the CCR website					We do not track consumer perceptions on their water quality or the effect of the CCR/ annual water quality report	Past inquiries have shown very little customer awareness of the CCR.		We address questions or concerns we have received from consumers			we use our website site to address those questions and concerns.							We do not test on the language, format, or other aspects of the CCR/ annual water quality report							We do not conduct publicity outreach regarding our CCR/ annual water quality report		Summary or explanation about information in the CCR	Contact information for the utility		Electronic copy of the CCR			We will provide a non english version of the CCR upon request. On the front page of the CCR we offer help in four languages : English, Hmong, Spanish and Somail-Ogow	Yes, we have used electronic delivery for some or all of our consumer confidence reports/ water quality reports		No, and we do not plan to in the future				Other (please describe below)		The [State Regulator] has tracked this information.
Midwest (Region 2)	150000					We do not track consumer engagement or understanding on the CCR/ annual water quality report			Conduct consumer surveys or other methods evaluating specific consumer concerns about their water quality						We address questions or concerns we have received from consumers										We do not test on the language, format, or other aspects of the CCR/ annual water quality report			Information about the CCR is available on our utility’s website							Contact information for the utility		Electronic copy of the CCR				Yes, we have used electronic delivery for some or all of our consumer confidence reports/ water quality reports	Not this year, but we plan to in the future						We have not tracked or conducted testing on whether electronic delivery has changed consumer feedback, understanding, or perceptions about water quality information in the eCCR
Midwest (Region 2)	344000					We do not track consumer engagement or understanding on the CCR/ annual water quality report						We do not track consumer perceptions on their water quality or the effect of the CCR/ annual water quality report			We address questions or concerns we have received from consumers	Other (please describe below)		We have created additional documents including a Typical Water Quality Report, Radionuclide Report, and FAQ documents on our website.							We do not test on the language, format, or other aspects of the CCR/ annual water quality report			Information about the CCR is available on our utility’s website	Announcements to local media outlets like newspapers, radio, or television stations	Social media announcements	Other (please describe below)		We engage customers at festivals and bring copies of our CCRs and other WQ reports.	Summary or explanation about information in the CCR	Contact information for the utility	Link(s) to EPA or CDC Consumer Confidence Report information	Electronic copy of the CCR		Other (please describe below)	Have additional water quality documents available.	Yes, we have used electronic delivery for some or all of our consumer confidence reports/ water quality reports			Since we are able to do electronic documents we include more information on contaminants that were tested for but not detected.				We have not tracked or conducted testing on whether electronic delivery has changed consumer feedback, understanding, or perceptions about water quality information in the eCCR
Midwest (Region 2)	1300000	Record the number of inquiries or comments received about the CCR/annual water quality report	Record the content of inquiries or comments received about the CCR/annual water quality report	Conduct consumer surveys or other methods that evaluate whether consumers feel they understand the information in the CCR/ annual water quality report				Conduct consumer surveys or other methods evaluating consumer confidence in their water quality							We address questions or concerns we have received from consumers										We do not test on the language, format, or other aspects of the CCR/ annual water quality report		Newsletters (electronic or hard copy) to consumers	Information about the CCR is available on our utility’s website		Social media announcements				Summary or explanation about information in the CCR	Contact information for the utility	Link(s) to EPA or CDC Consumer Confidence Report information	Electronic copy of the CCR	Electronic copy of the CCR in a non-English language			Yes, we have used electronic delivery for some or all of our consumer confidence reports/ water quality reports		No, and we do not plan to in the future		We have conducted consumer surveys
Midwest (Region 2)	1000					We do not track consumer engagement or understanding on the CCR/ annual water quality report						We do not track consumer perceptions on their water quality or the effect of the CCR/ annual water quality report			We address questions or concerns we have received from consumers				Change language/wording where applicable									Information about the CCR is available on our utility’s website							Contact information for the utility	Link(s) to EPA or CDC Consumer Confidence Report information	Electronic copy of the CCR				Yes, we have used electronic delivery for some or all of our consumer confidence reports/ water quality reports		No, and we do not plan to in the future					We have not tracked or conducted testing on whether electronic delivery has changed consumer feedback, understanding, or perceptions about water quality information in the eCCR
Midwest (Region 2)	1756					We do not track consumer engagement or understanding on the CCR/ annual water quality report						We do not track consumer perceptions on their water quality or the effect of the CCR/ annual water quality report					We do not use any methods to understand what information consumers would like in their CCR/ annual water quality report								We do not test on the language, format, or other aspects of the CCR/ annual water quality report			Information about the CCR is available on our utility’s website									Electronic copy of the CCR				Yes, we have used electronic delivery for some or all of our consumer confidence reports/ water quality reports		No, and we do not plan to in the future					We have not tracked or conducted testing on whether electronic delivery has changed consumer feedback, understanding, or perceptions about water quality information in the eCCR
Midwest (Region 2)	4400					We do not track consumer engagement or understanding on the CCR/ annual water quality report						We do not track consumer perceptions on their water quality or the effect of the CCR/ annual water quality report					We do not use any methods to understand what information consumers would like in their CCR/ annual water quality report								We do not test on the language, format, or other aspects of the CCR/ annual water quality report					Social media announcements					Contact information for the utility		Electronic copy of the CCR				Yes, we have used electronic delivery for some or all of our consumer confidence reports/ water quality reports		No, and we do not plan to in the future					We have not tracked or conducted testing on whether electronic delivery has changed consumer feedback, understanding, or perceptions about water quality information in the eCCR
Midwest (Region 2)	46000					We do not track consumer engagement or understanding on the CCR/ annual water quality report		Conduct consumer surveys or other methods evaluating consumer confidence in their water quality									We do not use any methods to understand what information consumers would like in their CCR/ annual water quality report								We do not test on the language, format, or other aspects of the CCR/ annual water quality report		Newsletters (electronic or hard copy) to consumers	Information about the CCR is available on our utility’s website		Social media announcements				Summary or explanation about information in the CCR	Contact information for the utility		Electronic copy of the CCR				Yes, we have used electronic delivery for some or all of our consumer confidence reports/ water quality reports		No, and we do not plan to in the future					We have not tracked or conducted testing on whether electronic delivery has changed consumer feedback, understanding, or perceptions about water quality information in the eCCR
Midwest (Region 2)	110000					We do not track consumer engagement or understanding on the CCR/ annual water quality report						We do not track consumer perceptions on their water quality or the effect of the CCR/ annual water quality report				Other (please describe below)		What we included in the CCR is guided by what is required through the State agency.							We do not test on the language, format, or other aspects of the CCR/ annual water quality report			Information about the CCR is available on our utility’s website			Other (please describe below)		We informed consumers of the CCR through their monthly water and sewer bill.	Summary or explanation about information in the CCR	Contact information for the utility		Electronic copy of the CCR				Yes, we have used electronic delivery for some or all of our consumer confidence reports/ water quality reports		No, and we do not plan to in the future					We have not tracked or conducted testing on whether electronic delivery has changed consumer feedback, understanding, or perceptions about water quality information in the eCCR
Midwest (Region 2)	1500000					We do not track consumer engagement or understanding on the CCR/ annual water quality report	There is no purpose to tracking consumer understanding since virtually all of the information needed in the CCR is mandated language. General consensus is most people have an 8th grade science understanding and therefore much of the CCR is not understandable by most except those people keenly interested in the information.					We do not track consumer perceptions on their water quality or the effect of the CCR/ annual water quality report	For the same reasons cited previously. We do track calls, and who requests paper copies of the CCR, however. Most people do not provide an opinion on the report, they just want it. Virtually all people go online to view the URL and there is no real feedback from those customers.				We do not use any methods to understand what information consumers would like in their CCR/ annual water quality report	The language necessary in the CCR is already prescribed, and it is lengthy. Most of the "non-required" language is aimed at informing customers of our excellent treatment and water quality, plus we have system-specific information to help customers understand their water source and treatment. There is usually a section related to "hot topics" (for instance, Lead last year and this year). The rest…						Other (please describe below)		We do not "test".... [State Agency] does not allow creativity with mandatory language and format of the Table of Detected Contaminants. While we may change from year to year how bulleted items appear versus text, this is mostly driven by layout, not understanding by the customer. There is no latitude in [State] for experimenting with mandatory language.	Newsletters (electronic or hard copy) to consumers	Information about the CCR is available on our utility’s website	Announcements to local media outlets like newspapers, radio, or television stations	Social media announcements	Other (please describe below)		we also place copies in the City libraries and County libraries (about 50 different branches in the [City] metro area), city hall, every mayor in our [communities] we serve, and several electronic newspapers, plus blogging and Facebook announcements. This is all coordinated with our annual open house at one of our four plants during National Drinking Water Week. This is not done to evaluate custo…	Summary or explanation about information in the CCR	Contact information for the utility	Link(s) to EPA or CDC Consumer Confidence Report information	Electronic copy of the CCR				Yes, we have used electronic delivery for some or all of our consumer confidence reports/ water quality reports			We definitely put more non-required information in the report now than when paper copies were used. Additionally, it is far more aesthetically pleasing and easy to read now. The cost to print out 3000 paper copies that are 14 pages long for distribution versus 480,000 copies is the driver for this, obviously. If we were ever required to return to paper copies, the font size would be decreased, no…				We have not tracked or conducted testing on whether electronic delivery has changed consumer feedback, understanding, or perceptions about water quality information in the eCCR
Midwest (Region 2)	10500					We do not track consumer engagement or understanding on the CCR/ annual water quality report						We do not track consumer perceptions on their water quality or the effect of the CCR/ annual water quality report					We do not use any methods to understand what information consumers would like in their CCR/ annual water quality report								We do not test on the language, format, or other aspects of the CCR/ annual water quality report		Newsletters (electronic or hard copy) to consumers	Information about the CCR is available on our utility’s website		Social media announcements				Summary or explanation about information in the CCR	Contact information for the utility		Electronic copy of the CCR				Yes, we have used electronic delivery for some or all of our consumer confidence reports/ water quality reports		No, and we do not plan to in the future					We have not tracked or conducted testing on whether electronic delivery has changed consumer feedback, understanding, or perceptions about water quality information in the eCCR
Midwest (Region 2)	5000	Record the number of inquiries or comments received about the CCR/annual water quality report	Record the content of inquiries or comments received about the CCR/annual water quality report									We do not track consumer perceptions on their water quality or the effect of the CCR/ annual water quality report			We address questions or concerns we have received from consumers										We do not test on the language, format, or other aspects of the CCR/ annual water quality report		Newsletters (electronic or hard copy) to consumers	Information about the CCR is available on our utility’s website	Announcements to local media outlets like newspapers, radio, or television stations		Other (please describe below)		Bill print messages, direct emails, posted notices in public places, delivered CCRs to public buildings and social service organizations	Summary or explanation about information in the CCR	Contact information for the utility		Electronic copy of the CCR				Yes, we have used electronic delivery for some or all of our consumer confidence reports/ water quality reports		No, and we do not plan to in the future					We have not tracked or conducted testing on whether electronic delivery has changed consumer feedback, understanding, or perceptions about water quality information in the eCCR
Midwest (Region 2)	35000					We do not track consumer engagement or understanding on the CCR/ annual water quality report						We do not track consumer perceptions on their water quality or the effect of the CCR/ annual water quality report			We address questions or concerns we have received from consumers							Change the amount or type of information that is included in the CCR/annual water quality report										We do not conduct publicity outreach regarding our CCR/ annual water quality report					Electronic copy of the CCR				Yes, we have used electronic delivery for some or all of our consumer confidence reports/ water quality reports		No, and we do not plan to in the future					We have not tracked or conducted testing on whether electronic delivery has changed consumer feedback, understanding, or perceptions about water quality information in the eCCR
Midwest (Region 2)	42000					We do not track consumer engagement or understanding on the CCR/ annual water quality report						We do not track consumer perceptions on their water quality or the effect of the CCR/ annual water quality report					We do not use any methods to understand what information consumers would like in their CCR/ annual water quality report								We do not test on the language, format, or other aspects of the CCR/ annual water quality report							We do not conduct publicity outreach regarding our CCR/ annual water quality report			Contact information for the utility		Electronic copy of the CCR				Yes, we have used electronic delivery for some or all of our consumer confidence reports/ water quality reports
Midwest (Region 2)	100000					We do not track consumer engagement or understanding on the CCR/ annual water quality report						We do not track consumer perceptions on their water quality or the effect of the CCR/ annual water quality report					We do not use any methods to understand what information consumers would like in their CCR/ annual water quality report								We do not test on the language, format, or other aspects of the CCR/ annual water quality report			Information about the CCR is available on our utility’s website	Announcements to local media outlets like newspapers, radio, or television stations		Other (please describe below)		Post copies at community organizations and public places.				Electronic copy of the CCR				Yes, we have used electronic delivery for some or all of our consumer confidence reports/ water quality reports			Our CCR changes when the [State Regulator] began using the [State Tool]. We now only report what is contained in the [State Tool]				We have not tracked or conducted testing on whether electronic delivery has changed consumer feedback, understanding, or perceptions about water quality information in the eCCR
Midwest (Region 2)	29000					We do not track consumer engagement or understanding on the CCR/ annual water quality report						We do not track consumer perceptions on their water quality or the effect of the CCR/ annual water quality report					We do not use any methods to understand what information consumers would like in their CCR/ annual water quality report								We do not test on the language, format, or other aspects of the CCR/ annual water quality report		Newsletters (electronic or hard copy) to consumers	Information about the CCR is available on our utility’s website						Summary or explanation about information in the CCR			Electronic copy of the CCR				We have not used any electronic delivery methods for our CCR delivery and do not plan to in the future
Midwest (Region 2)	30000		Record the content of inquiries or comments received about the CCR/annual water quality report									We do not track consumer perceptions on their water quality or the effect of the CCR/ annual water quality report					We do not use any methods to understand what information consumers would like in their CCR/ annual water quality report		Change language/wording where applicable	Change format of information (e.g. placement in the report, bulleted items vs. paragraph)	Change format of figures or pictures (e.g. placement in the report, report includes pictures and diagrams vs. includes only text)	Change the amount or type of information that is included in the CCR/annual water quality report					Newsletters (electronic or hard copy) to consumers	Information about the CCR is available on our utility’s website						Summary or explanation about information in the CCR	Contact information for the utility		Electronic copy of the CCR				We have not used any electronic delivery methods for our CCR delivery and do not plan to in the future
Midwest (Region 2)	430					We do not track consumer engagement or understanding on the CCR/ annual water quality report	We have never had any inquiries or comments about the CCR. Should we in the future, we would record number and content of questions or comments.					We do not track consumer perceptions on their water quality or the effect of the CCR/ annual water quality report					We do not use any methods to understand what information consumers would like in their CCR/ annual water quality report								We do not test on the language, format, or other aspects of the CCR/ annual water quality report		Newsletters (electronic or hard copy) to consumers	Information about the CCR is available on our utility’s website	Announcements to local media outlets like newspapers, radio, or television stations		Other (please describe below)		posted at town hall, post office and library.	Summary or explanation about information in the CCR	Contact information for the utility		Electronic copy of the CCR				We have not used any electronic delivery methods for our CCR delivery but plan to in the future
Midwest (Region 2)	3086	Record the number of inquiries or comments received about the CCR/annual water quality report										We do not track consumer perceptions on their water quality or the effect of the CCR/ annual water quality report			We address questions or concerns we have received from consumers										We do not test on the language, format, or other aspects of the CCR/ annual water quality report		Newsletters (electronic or hard copy) to consumers		Announcements to local media outlets like newspapers, radio, or television stations										Other (please describe below)	no website	We have not used any electronic delivery methods for our CCR delivery but plan to in the future
Midwest (Region 2)	3800					We do not track consumer engagement or understanding on the CCR/ annual water quality report						We do not track consumer perceptions on their water quality or the effect of the CCR/ annual water quality report			We address questions or concerns we have received from consumers										We do not test on the language, format, or other aspects of the CCR/ annual water quality report							We do not conduct publicity outreach regarding our CCR/ annual water quality report			Contact information for the utility		Electronic copy of the CCR				We have not used any electronic delivery methods for our CCR delivery but plan to in the future
Midwest (Region 2)	6500					We do not track consumer engagement or understanding on the CCR/ annual water quality report	If they contact us we will offer assistance in understanding of the CCR.					We do not track consumer perceptions on their water quality or the effect of the CCR/ annual water quality report				Other (please describe below)		We have an outside agency that puts together the CCR for us. We feel that the information on there explains it very well.							We do not test on the language, format, or other aspects of the CCR/ annual water quality report							We do not conduct publicity outreach regarding our CCR/ annual water quality report					Electronic copy of the CCR				We have not used any electronic delivery methods for our CCR delivery and do not plan to in the future
Midwest (Region 2)	14700					We do not track consumer engagement or understanding on the CCR/ annual water quality report						We do not track consumer perceptions on their water quality or the effect of the CCR/ annual water quality report					We do not use any methods to understand what information consumers would like in their CCR/ annual water quality report								We do not test on the language, format, or other aspects of the CCR/ annual water quality report							We do not conduct publicity outreach regarding our CCR/ annual water quality report					Electronic copy of the CCR				We have not used any electronic delivery methods for our CCR delivery but plan to in the future
Midwest (Region 2)	10500					We do not track consumer engagement or understanding on the CCR/ annual water quality report						We do not track consumer perceptions on their water quality or the effect of the CCR/ annual water quality report					We do not use any methods to understand what information consumers would like in their CCR/ annual water quality report								We do not test on the language, format, or other aspects of the CCR/ annual water quality report							We do not conduct publicity outreach regarding our CCR/ annual water quality report		Summary or explanation about information in the CCR	Contact information for the utility	Link(s) to EPA or CDC Consumer Confidence Report information	Electronic copy of the CCR				We have not used any electronic delivery methods for our CCR delivery and do not plan to in the future
Midwest (Region 2)	3200					We do not track consumer engagement or understanding on the CCR/ annual water quality report						We do not track consumer perceptions on their water quality or the effect of the CCR/ annual water quality report					We do not use any methods to understand what information consumers would like in their CCR/ annual water quality report								We do not test on the language, format, or other aspects of the CCR/ annual water quality report			Information about the CCR is available on our utility’s website						Summary or explanation about information in the CCR	Contact information for the utility						We have not used any electronic delivery methods for our CCR delivery and do not plan to in the future
Midwest (Region 2)	1186					We do not track consumer engagement or understanding on the CCR/ annual water quality report						We do not track consumer perceptions on their water quality or the effect of the CCR/ annual water quality report			We address questions or concerns we have received from consumers										We do not test on the language, format, or other aspects of the CCR/ annual water quality report			Information about the CCR is available on our utility’s website			Other (please describe below)		Billing notes.		Contact information for the utility		Electronic copy of the CCR				We have not used any electronic delivery methods for our CCR delivery but plan to in the future
Midwest (Region 2)	1600					We do not track consumer engagement or understanding on the CCR/ annual water quality report						We do not track consumer perceptions on their water quality or the effect of the CCR/ annual water quality report					We do not use any methods to understand what information consumers would like in their CCR/ annual water quality report								We do not test on the language, format, or other aspects of the CCR/ annual water quality report							We do not conduct publicity outreach regarding our CCR/ annual water quality report		Summary or explanation about information in the CCR	Contact information for the utility		Electronic copy of the CCR				We have not used any electronic delivery methods for our CCR delivery and do not plan to in the future
Midwest (Region 2)	1900					We do not track consumer engagement or understanding on the CCR/ annual water quality report					Other (please describe below)		We respond to customer inquiries and investigate any customer complaints or concerns.				We do not use any methods to understand what information consumers would like in their CCR/ annual water quality report								We do not test on the language, format, or other aspects of the CCR/ annual water quality report			Information about the CCR is available on our utility’s website	Announcements to local media outlets like newspapers, radio, or television stations		Other (please describe below)		Public library display.	Summary or explanation about information in the CCR	Contact information for the utility	Link(s) to EPA or CDC Consumer Confidence Report information					We have not used any electronic delivery methods for our CCR delivery and do not plan to in the future
Midwest (Region 2)	2500					We do not track consumer engagement or understanding on the CCR/ annual water quality report						We do not track consumer perceptions on their water quality or the effect of the CCR/ annual water quality report			We address questions or concerns we have received from consumers										We do not test on the language, format, or other aspects of the CCR/ annual water quality report		Newsletters (electronic or hard copy) to consumers	Information about the CCR is available on our utility’s website	Announcements to local media outlets like newspapers, radio, or television stations					Summary or explanation about information in the CCR	Contact information for the utility	Link(s) to EPA or CDC Consumer Confidence Report information	Electronic copy of the CCR				We have not used any electronic delivery methods for our CCR delivery but plan to in the future
Midwest (Region 2)	75000	Record the number of inquiries or comments received about the CCR/annual water quality report										We do not track consumer perceptions on their water quality or the effect of the CCR/ annual water quality report			We address questions or concerns we have received from consumers										We do not test on the language, format, or other aspects of the CCR/ annual water quality report							We do not conduct publicity outreach regarding our CCR/ annual water quality report			Contact information for the utility	Link(s) to EPA or CDC Consumer Confidence Report information	Electronic copy of the CCR				We have not used any electronic delivery methods for our CCR delivery and do not plan to in the future
Midwest (Region 2)	280000	Record the number of inquiries or comments received about the CCR/annual water quality report	Record the content of inquiries or comments received about the CCR/annual water quality report									We do not track consumer perceptions on their water quality or the effect of the CCR/ annual water quality report					We do not use any methods to understand what information consumers would like in their CCR/ annual water quality report		Change language/wording where applicable	Change format of information (e.g. placement in the report, bulleted items vs. paragraph)	Change format of figures or pictures (e.g. placement in the report, report includes pictures and diagrams vs. includes only text)							Information about the CCR is available on our utility’s website	Announcements to local media outlets like newspapers, radio, or television stations	Social media announcements				Summary or explanation about information in the CCR	Contact information for the utility		Electronic copy of the CCR	Electronic copy of the CCR in a non-English language			We have not used any electronic delivery methods for our CCR delivery but plan to in the future
Midwest (Region 2)	7000					We do not track consumer engagement or understanding on the CCR/ annual water quality report					Other (please describe below)		[Utility and City] annually conduct a random survey of the [City]. This survey covers citizen satisfaction with Police, Fire...Water and Wastewater services. We then compare each survey to the previous ones to look for trends in satisfaction.				We do not use any methods to understand what information consumers would like in their CCR/ annual water quality report							Other (please describe below)		This year we hired a professional firm to arrange and refine our CCR. Because of the amount of information that [State] required,we needed a professional to create a 3 fold color brochure to accommodate the text and numerical test results.	Newsletters (electronic or hard copy) to consumers	Information about the CCR is available on our utility’s website	Announcements to local media outlets like newspapers, radio, or television stations	Social media announcements					Contact information for the utility		Electronic copy of the CCR				We have not used any electronic delivery methods for our CCR delivery and do not plan to in the future
Midwest (Region 2)	22000					We do not track consumer engagement or understanding on the CCR/ annual water quality report	we rarely get questions on the CCR or requests to get a copy.				Other (please describe below)		Recently - within the last 2 years - a precipitation issue came up in some homes so we did a study on that issue. Our lab manager made sure residents involved had the CCR and he went through it with them so they could understand what each part pertained to.				We do not use any methods to understand what information consumers would like in their CCR/ annual water quality report							Other (please describe below)		This year the format of the CCR was changed for the first time since the CCR reporting began. We have had a positive response to the changes.		Information about the CCR is available on our utility’s website						Summary or explanation about information in the CCR	Contact information for the utility		Electronic copy of the CCR				We have not used any electronic delivery methods for our CCR delivery but plan to in the future
Midwest (Region 2)	20000					We do not track consumer engagement or understanding on the CCR/ annual water quality report	We generally do not get any inquiries.					We do not track consumer perceptions on their water quality or the effect of the CCR/ annual water quality report	We generally do not get any inquiries.		We address questions or concerns we have received from consumers			We generally do not get any inquiries.							We do not test on the language, format, or other aspects of the CCR/ annual water quality report	We use what is required by [State Agency]		Information about the CCR is available on our utility’s website											Other (please describe below)	Where customers can get one if they do not receive in the mail.	We have not used any electronic delivery methods for our CCR delivery and do not plan to in the future
Midwest (Region 2)	25000					We do not track consumer engagement or understanding on the CCR/ annual water quality report						We do not track consumer perceptions on their water quality or the effect of the CCR/ annual water quality report			We address questions or concerns we have received from consumers										We do not test on the language, format, or other aspects of the CCR/ annual water quality report			Information about the CCR is available on our utility’s website		Social media announcements						Link(s) to EPA or CDC Consumer Confidence Report information	Electronic copy of the CCR				We have not used any electronic delivery methods for our CCR delivery but plan to in the future
Midwest (Region 2)	65000					We do not track consumer engagement or understanding on the CCR/ annual water quality report	We seldom get comments from our CCR mailing.					We do not track consumer perceptions on their water quality or the effect of the CCR/ annual water quality report			We address questions or concerns we have received from consumers						Change format of figures or pictures (e.g. placement in the report, report includes pictures and diagrams vs. includes only text)				We do not test on the language, format, or other aspects of the CCR/ annual water quality report			Information about the CCR is available on our utility’s website							Contact information for the utility						We have not used any electronic delivery methods for our CCR delivery and do not plan to in the future
Midwest (Region 2)	2350					We do not track consumer engagement or understanding on the CCR/ annual water quality report			Conduct consumer surveys or other methods evaluating specific consumer concerns about their water quality								We do not use any methods to understand what information consumers would like in their CCR/ annual water quality report								We do not test on the language, format, or other aspects of the CCR/ annual water quality report		Newsletters (electronic or hard copy) to consumers	Information about the CCR is available on our utility’s website							Contact information for the utility		Electronic copy of the CCR				We have not used any electronic delivery methods for our CCR delivery and do not plan to in the future
Midwest (Region 2)	5500	Record the number of inquiries or comments received about the CCR/annual water quality report										We do not track consumer perceptions on their water quality or the effect of the CCR/ annual water quality report					We do not use any methods to understand what information consumers would like in their CCR/ annual water quality report								We do not test on the language, format, or other aspects of the CCR/ annual water quality report		Newsletters (electronic or hard copy) to consumers	Information about the CCR is available on our utility’s website	Announcements to local media outlets like newspapers, radio, or television stations	Social media announcements				Summary or explanation about information in the CCR	Contact information for the utility	Link(s) to EPA or CDC Consumer Confidence Report information	Electronic copy of the CCR				We have not used any electronic delivery methods for our CCR delivery and do not plan to in the future
Midwest (Region 2)	35700	Record the number of inquiries or comments received about the CCR/annual water quality report							Conduct consumer surveys or other methods evaluating specific consumer concerns about their water quality								We do not use any methods to understand what information consumers would like in their CCR/ annual water quality report		Change language/wording where applicable	Change format of information (e.g. placement in the report, bulleted items vs. paragraph)	Change format of figures or pictures (e.g. placement in the report, report includes pictures and diagrams vs. includes only text)	Change the amount or type of information that is included in the CCR/annual water quality report						Information about the CCR is available on our utility’s website		Social media announcements				Summary or explanation about information in the CCR	Contact information for the utility		Electronic copy of the CCR	Electronic copy of the CCR in a non-English language			We have not used any electronic delivery methods for our CCR delivery but plan to in the future
Northeast (Region 1)	116000			Conduct consumer surveys or other methods that evaluate whether consumers feel they understand the information in the CCR/ annual water quality report				Conduct consumer surveys or other methods evaluating consumer confidence in their water quality	Conduct consumer surveys or other methods evaluating specific consumer concerns about their water quality						We address questions or concerns we have received from consumers										We do not test on the language, format, or other aspects of the CCR/ annual water quality report		Newsletters (electronic or hard copy) to consumers	Information about the CCR is available on our utility’s website	Announcements to local media outlets like newspapers, radio, or television stations	Social media announcements				Summary or explanation about information in the CCR	Contact information for the utility	Link(s) to EPA or CDC Consumer Confidence Report information	Electronic copy of the CCR				We had used electronic delivery for some or all of our consumer confidence reports/ water quality reports but have since stopped		No, and we do not plan to in the future		We have conducted consumer surveys
Northeast (Region 1)	104000			Conduct consumer surveys or other methods that evaluate whether consumers feel they understand the information in the CCR/ annual water quality report						Conduct consumer surveys or other methods that evaluate the effect of the CCR/ annual water quality report on consumer confidence							We do not use any methods to understand what information consumers would like in their CCR/ annual water quality report		Change language/wording where applicable	Change format of information (e.g. placement in the report, bulleted items vs. paragraph)	Change format of figures or pictures (e.g. placement in the report, report includes pictures and diagrams vs. includes only text)						Newsletters (electronic or hard copy) to consumers	Information about the CCR is available on our utility’s website	Announcements to local media outlets like newspapers, radio, or television stations					Summary or explanation about information in the CCR	Contact information for the utility	Link(s) to EPA or CDC Consumer Confidence Report information	Electronic copy of the CCR				Yes, we have used electronic delivery for some or all of our consumer confidence reports/ water quality reports		No, and we do not plan to in the future					We have not tracked or conducted testing on whether electronic delivery has changed consumer feedback, understanding, or perceptions about water quality information in the eCCR
Northeast (Region 1)	230000	Record the number of inquiries or comments received about the CCR/annual water quality report	Record the content of inquiries or comments received about the CCR/annual water quality report	Conduct consumer surveys or other methods that evaluate whether consumers feel they understand the information in the CCR/ annual water quality report				Conduct consumer surveys or other methods evaluating consumer confidence in their water quality	Conduct consumer surveys or other methods evaluating specific consumer concerns about their water quality						We address questions or concerns we have received from consumers										We do not test on the language, format, or other aspects of the CCR/ annual water quality report		Newsletters (electronic or hard copy) to consumers	Information about the CCR is available on our utility’s website							Contact information for the utility		Electronic copy of the CCR				Yes, we have used electronic delivery for some or all of our consumer confidence reports/ water quality reports			Expanded the amount of info on Lead.				We have not tracked or conducted testing on whether electronic delivery has changed consumer feedback, understanding, or perceptions about water quality information in the eCCR
Northeast (Region 1)	1200					We do not track consumer engagement or understanding on the CCR/ annual water quality report						We do not track consumer perceptions on their water quality or the effect of the CCR/ annual water quality report					We do not use any methods to understand what information consumers would like in their CCR/ annual water quality report								We do not test on the language, format, or other aspects of the CCR/ annual water quality report							We do not conduct publicity outreach regarding our CCR/ annual water quality report					Electronic copy of the CCR				Yes, we have used electronic delivery for some or all of our consumer confidence reports/ water quality reports		No, and we do not plan to in the future					We have not tracked or conducted testing on whether electronic delivery has changed consumer feedback, understanding, or perceptions about water quality information in the eCCR
Northeast (Region 1)	20000					We do not track consumer engagement or understanding on the CCR/ annual water quality report						We do not track consumer perceptions on their water quality or the effect of the CCR/ annual water quality report				Other (please describe below)		We post link on Facebook and Twitter. From time to time we will receive feedback and where applicable will modify CCR per comments provided. The format we use is a template provided by [State Agency] and recommended for use by [State Agency].							We do not test on the language, format, or other aspects of the CCR/ annual water quality report		Newsletters (electronic or hard copy) to consumers	Information about the CCR is available on our utility’s website	Announcements to local media outlets like newspapers, radio, or television stations	Social media announcements				Summary or explanation about information in the CCR	Contact information for the utility	Link(s) to EPA or CDC Consumer Confidence Report information	Electronic copy of the CCR				Yes, we have used electronic delivery for some or all of our consumer confidence reports/ water quality reports			We provide a more comprehensive report. Some residents like this, some find it too long.				We have not tracked or conducted testing on whether electronic delivery has changed consumer feedback, understanding, or perceptions about water quality information in the eCCR
Northeast (Region 1)	2000					We do not track consumer engagement or understanding on the CCR/ annual water quality report						We do not track consumer perceptions on their water quality or the effect of the CCR/ annual water quality report					We do not use any methods to understand what information consumers would like in their CCR/ annual water quality report								We do not test on the language, format, or other aspects of the CCR/ annual water quality report							We do not conduct publicity outreach regarding our CCR/ annual water quality report		Summary or explanation about information in the CCR	Contact information for the utility		Electronic copy of the CCR				Yes, we have used electronic delivery for some or all of our consumer confidence reports/ water quality reports		No, and we do not plan to in the future					We have not tracked or conducted testing on whether electronic delivery has changed consumer feedback, understanding, or perceptions about water quality information in the eCCR
Northeast (Region 1)	12600					We do not track consumer engagement or understanding on the CCR/ annual water quality report						We do not track consumer perceptions on their water quality or the effect of the CCR/ annual water quality report					We do not use any methods to understand what information consumers would like in their CCR/ annual water quality report								We do not test on the language, format, or other aspects of the CCR/ annual water quality report			Information about the CCR is available on our utility’s website						Summary or explanation about information in the CCR	Contact information for the utility	Link(s) to EPA or CDC Consumer Confidence Report information	Electronic copy of the CCR				Yes, we have used electronic delivery for some or all of our consumer confidence reports/ water quality reports	Not this year, but we plan to in the future						We have not tracked or conducted testing on whether electronic delivery has changed consumer feedback, understanding, or perceptions about water quality information in the eCCR
Northeast (Region 1)	61000		Record the content of inquiries or comments received about the CCR/annual water quality report									We do not track consumer perceptions on their water quality or the effect of the CCR/ annual water quality report			We address questions or concerns we have received from consumers	Other (please describe below)		We review other CCRs to see what kinds of information is included and follow best practices			Change format of figures or pictures (e.g. placement in the report, report includes pictures and diagrams vs. includes only text)					Required language makes it difficult to modify verbage, but graphics helps to further engage customers.	Newsletters (electronic or hard copy) to consumers	Information about the CCR is available on our utility’s website	Announcements to local media outlets like newspapers, radio, or television stations	Social media announcements				Summary or explanation about information in the CCR	Contact information for the utility		Electronic copy of the CCR				Yes, we have used electronic delivery for some or all of our consumer confidence reports/ water quality reports			Added more graphics, increased font size, made design more attractive				We have not tracked or conducted testing on whether electronic delivery has changed consumer feedback, understanding, or perceptions about water quality information in the eCCR
Northeast (Region 1)	800000	Record the number of inquiries or comments received about the CCR/annual water quality report	Record the content of inquiries or comments received about the CCR/annual water quality report					Conduct consumer surveys or other methods evaluating consumer confidence in their water quality	Conduct consumer surveys or other methods evaluating specific consumer concerns about their water quality						We address questions or concerns we have received from consumers							Change the amount or type of information that is included in the CCR/annual water quality report						Information about the CCR is available on our utility’s website		Social media announcements					Contact information for the utility		Electronic copy of the CCR				Yes, we have used electronic delivery for some or all of our consumer confidence reports/ water quality reports			added information on water conservation, how to join consumer panels, etc.		We have tracked the number of times the report has been accessed
Northeast (Region 1)	2500					We do not track consumer engagement or understanding on the CCR/ annual water quality report						We do not track consumer perceptions on their water quality or the effect of the CCR/ annual water quality report			We address questions or concerns we have received from consumers										We do not test on the language, format, or other aspects of the CCR/ annual water quality report		Newsletters (electronic or hard copy) to consumers	Information about the CCR is available on our utility’s website						Summary or explanation about information in the CCR	Contact information for the utility		Electronic copy of the CCR				Yes, we have used electronic delivery for some or all of our consumer confidence reports/ water quality reports	Not this year, but we plan to in the future						We have not tracked or conducted testing on whether electronic delivery has changed consumer feedback, understanding, or perceptions about water quality information in the eCCR
Northeast (Region 1)	8000	Record the number of inquiries or comments received about the CCR/annual water quality report										We do not track consumer perceptions on their water quality or the effect of the CCR/ annual water quality report			We address questions or concerns we have received from consumers										We do not test on the language, format, or other aspects of the CCR/ annual water quality report		Newsletters (electronic or hard copy) to consumers	Information about the CCR is available on our utility’s website		Social media announcements							Electronic copy of the CCR				Yes, we have used electronic delivery for some or all of our consumer confidence reports/ water quality reports			Added photos and more detailed information about various issues				We have not tracked or conducted testing on whether electronic delivery has changed consumer feedback, understanding, or perceptions about water quality information in the eCCR
Northeast (Region 1)	103000	Record the number of inquiries or comments received about the CCR/annual water quality report	Record the content of inquiries or comments received about the CCR/annual water quality report	Conduct consumer surveys or other methods that evaluate whether consumers feel they understand the information in the CCR/ annual water quality report							Other (please describe below)		Conduct customer service surveys with components that address water quality and CCR awareness.	We conduct methods, such as surveys or polls, that directly ask consumers what information they would like in their CCR/ annual water quality report	We address questions or concerns we have received from consumers										We do not test on the language, format, or other aspects of the CCR/ annual water quality report			Information about the CCR is available on our utility’s website	Announcements to local media outlets like newspapers, radio, or television stations	Social media announcements	Other (please describe below)		Include separate notice of CCR availability with Customer bills in quarter leading up to deadline for CCR release.	Summary or explanation about information in the CCR	Contact information for the utility	Link(s) to EPA or CDC Consumer Confidence Report information	Electronic copy of the CCR				Yes, we have used electronic delivery for some or all of our consumer confidence reports/ water quality reports			We are no longer constrained by print requirements, accordingly it is easier to add a page to the report or delete a page from the report as circumstances dictate.	We have conducted consumer surveys
Northeast (Region 1)	8500000	Record the number of inquiries or comments received about the CCR/annual water quality report										We do not track consumer perceptions on their water quality or the effect of the CCR/ annual water quality report			We address questions or concerns we have received from consumers				Change language/wording where applicable	Change format of information (e.g. placement in the report, bulleted items vs. paragraph)	Change format of figures or pictures (e.g. placement in the report, report includes pictures and diagrams vs. includes only text)						Newsletters (electronic or hard copy) to consumers	Information about the CCR is available on our utility’s website		Social media announcements	Other (please describe below)		subway & bus ads, bus shelter ads, digital signage, distribution to libraries, schools, community and civic association meetings, outreach events (including trade shows, Greenmarkets, health fairs and street fairs), town halls, and project tours.	Summary or explanation about information in the CCR	Contact information for the utility		Electronic copy of the CCR	Electronic copy of the CCR in a non-English language			Yes, we have used electronic delivery for some or all of our consumer confidence reports/ water quality reports		No, and we do not plan to in the future					We have not tracked or conducted testing on whether electronic delivery has changed consumer feedback, understanding, or perceptions about water quality information in the eCCR
Northeast (Region 1)	35000				Other (please describe below)		We record which customers request paper copies of our CCR. We have not received calls from customers asking for further explanation of the CCR in recent years.					We do not track consumer perceptions on their water quality or the effect of the CCR/ annual water quality report					We do not use any methods to understand what information consumers would like in their CCR/ annual water quality report		Change language/wording where applicable									Information about the CCR is available on our utility’s website	Announcements to local media outlets like newspapers, radio, or television stations	Social media announcements					Contact information for the utility		Electronic copy of the CCR				Yes, we have used electronic delivery for some or all of our consumer confidence reports/ water quality reports		No, and we do not plan to in the future					We have not tracked or conducted testing on whether electronic delivery has changed consumer feedback, understanding, or perceptions about water quality information in the eCCR
Northeast (Region 1)	55000	Record the number of inquiries or comments received about the CCR/annual water quality report			Other (please describe below)		Record number of requests for a printed copy to be sent.					We do not track consumer perceptions on their water quality or the effect of the CCR/ annual water quality report					We do not use any methods to understand what information consumers would like in their CCR/ annual water quality report		Change language/wording where applicable								Newsletters (electronic or hard copy) to consumers	Information about the CCR is available on our utility’s website		Social media announcements	Other (please describe below)		Separate notice to businesses, restaurants, hospitals, schools, etc., and master-metered apartment complexes.	Summary or explanation about information in the CCR	Contact information for the utility		Electronic copy of the CCR			System description and water hardness info, which is most often requested water quality data.	Yes, we have used electronic delivery for some or all of our consumer confidence reports/ water quality reports		No, and we do not plan to in the future					We have not tracked or conducted testing on whether electronic delivery has changed consumer feedback, understanding, or perceptions about water quality information in the eCCR
Northeast (Region 1)	57958				Other (please describe below)		Tracking is not formal, however all calls regarding the CCR are sent to the same person, so they can gauge what questions are asked.					We do not track consumer perceptions on their water quality or the effect of the CCR/ annual water quality report			We address questions or concerns we have received from consumers				Change language/wording where applicable			Change the amount or type of information that is included in the CCR/annual water quality report						Information about the CCR is available on our utility’s website						Summary or explanation about information in the CCR	Contact information for the utility		Electronic copy of the CCR				Yes, we have used electronic delivery for some or all of our consumer confidence reports/ water quality reports		No, and we do not plan to in the future			We have tracked the number of times the report has been accessed
Northeast (Region 1)	16000	Record the number of inquiries or comments received about the CCR/annual water quality report										We do not track consumer perceptions on their water quality or the effect of the CCR/ annual water quality report			We address questions or concerns we have received from consumers					Change format of information (e.g. placement in the report, bulleted items vs. paragraph)		Change the amount or type of information that is included in the CCR/annual water quality report						Information about the CCR is available on our utility’s website	Announcements to local media outlets like newspapers, radio, or television stations	Social media announcements	Other (please describe below)		Project blogs	Summary or explanation about information in the CCR	Contact information for the utility		Electronic copy of the CCR				We have not used any electronic delivery methods for our CCR delivery and do not plan to in the future
Northeast (Region 1)	5500	Record the number of inquiries or comments received about the CCR/annual water quality report	Record the content of inquiries or comments received about the CCR/annual water quality report									We do not track consumer perceptions on their water quality or the effect of the CCR/ annual water quality report													We do not test on the language, format, or other aspects of the CCR/ annual water quality report			Information about the CCR is available on our utility’s website	Announcements to local media outlets like newspapers, radio, or television stations						Contact information for the utility		Electronic copy of the CCR				We have not used any electronic delivery methods for our CCR delivery and do not plan to in the future
Northeast (Region 1)	8900					We do not track consumer engagement or understanding on the CCR/ annual water quality report						We do not track consumer perceptions on their water quality or the effect of the CCR/ annual water quality report					We do not use any methods to understand what information consumers would like in their CCR/ annual water quality report		Change language/wording where applicable					Other (please describe below)		We produce "web-ready" versions in Portuguese and Spanish and post them on our web site.		Information about the CCR is available on our utility’s website	Announcements to local media outlets like newspapers, radio, or television stations	Social media announcements					Contact information for the utility		Electronic copy of the CCR	Electronic copy of the CCR in a non-English language			We have not used any electronic delivery methods for our CCR delivery but plan to in the future
Northeast (Region 1)	2200000	Record the number of inquiries or comments received about the CCR/annual water quality report	Record the content of inquiries or comments received about the CCR/annual water quality report								Other (please describe below)		Back in beginning of the CCR rule, we conducted consumer focus groups to get an idea of how to tailor the CCR. Since that time, we have not completed any additional surveys.		We address questions or concerns we have received from consumers							Change the amount or type of information that is included in the CCR/annual water quality report		Other (please describe below)		Every year, we have a theme where we emphasize a hot topic from the past year: lead in tap water, drought, infrastructure improvements. Otherwise, much of the information is similar from year to year.		Information about the CCR is available on our utility’s website	Announcements to local media outlets like newspapers, radio, or television stations	Social media announcements				Summary or explanation about information in the CCR	Contact information for the utility	Link(s) to EPA or CDC Consumer Confidence Report information	Electronic copy of the CCR	Electronic copy of the CCR in a non-English language			We have not used any electronic delivery methods for our CCR delivery but plan to in the future
Northeast (Region 1)	5120					We do not track consumer engagement or understanding on the CCR/ annual water quality report			Conduct consumer surveys or other methods evaluating specific consumer concerns about their water quality				We track water quality concerns based on our digital asset management system utilizing a "service requests" designation that specifically refers to water quality concerns.				We do not use any methods to understand what information consumers would like in their CCR/ annual water quality report								We do not test on the language, format, or other aspects of the CCR/ annual water quality report			Information about the CCR is available on our utility’s website	Announcements to local media outlets like newspapers, radio, or television stations	Social media announcements							Electronic copy of the CCR				We have not used any electronic delivery methods for our CCR delivery but plan to in the future
Northeast (Region 1)	35000																																	Summary or explanation about information in the CCR	Contact information for the utility		Electronic copy of the CCR					Not this year, but we plan to in the future
Northeast (Region 1)	3001	Record the number of inquiries or comments received about the CCR/annual water quality report	Record the content of inquiries or comments received about the CCR/annual water quality report								Other (please describe below)		Semester visits to all customers to review any conditions or service interruptions		We address questions or concerns we have received from consumers										We do not test on the language, format, or other aspects of the CCR/ annual water quality report							We do not conduct publicity outreach regarding our CCR/ annual water quality report							Other (please describe below)	We do not have a website	We have not used any electronic delivery methods for our CCR delivery and do not plan to in the future
South (Region 3)	17500					We do not track consumer engagement or understanding on the CCR/ annual water quality report						We do not track consumer perceptions on their water quality or the effect of the CCR/ annual water quality report			We address questions or concerns we have received from consumers				Change language/wording where applicable	Change format of information (e.g. placement in the report, bulleted items vs. paragraph)	Change format of figures or pictures (e.g. placement in the report, report includes pictures and diagrams vs. includes only text)	Change the amount or type of information that is included in the CCR/annual water quality report						Information about the CCR is available on our utility’s website							Contact information for the utility		Electronic copy of the CCR				We have not used any electronic delivery methods for our CCR delivery but plan to in the future
South (Region 3)	345000	Record the number of inquiries or comments received about the CCR/annual water quality report										We do not track consumer perceptions on their water quality or the effect of the CCR/ annual water quality report			We address questions or concerns we have received from consumers							Change the amount or type of information that is included in the CCR/annual water quality report						Information about the CCR is available on our utility’s website		Social media announcements	Other (please describe below)		Bill inserts to inform customers about the CCR and it's availability on-line and in their mail boxes.	Summary or explanation about information in the CCR		Link(s) to EPA or CDC Consumer Confidence Report information	Electronic copy of the CCR	Electronic copy of the CCR in a non-English language			We have not used any electronic delivery methods for our CCR delivery but plan to in the future
South (Region 3)	36000	Record the number of inquiries or comments received about the CCR/annual water quality report						Conduct consumer surveys or other methods evaluating consumer confidence in their water quality	Conduct consumer surveys or other methods evaluating specific consumer concerns about their water quality								We do not use any methods to understand what information consumers would like in their CCR/ annual water quality report								We do not test on the language, format, or other aspects of the CCR/ annual water quality report			Information about the CCR is available on our utility’s website		Social media announcements						Link(s) to EPA or CDC Consumer Confidence Report information	Electronic copy of the CCR				We have not used any electronic delivery methods for our CCR delivery but plan to in the future
South (Region 3)	2114	Record the number of inquiries or comments received about the CCR/annual water quality report	Record the content of inquiries or comments received about the CCR/annual water quality report									We do not track consumer perceptions on their water quality or the effect of the CCR/ annual water quality report			We address questions or concerns we have received from consumers		We do not use any methods to understand what information consumers would like in their CCR/ annual water quality report		Change language/wording where applicable	Change format of information (e.g. placement in the report, bulleted items vs. paragraph)	Change format of figures or pictures (e.g. placement in the report, report includes pictures and diagrams vs. includes only text)	Change the amount or type of information that is included in the CCR/annual water quality report					Newsletters (electronic or hard copy) to consumers	Information about the CCR is available on our utility’s website						Summary or explanation about information in the CCR	Contact information for the utility		Electronic copy of the CCR				We have not used any electronic delivery methods for our CCR delivery but plan to in the future
South (Region 3)	32289					We do not track consumer engagement or understanding on the CCR/ annual water quality report						We do not track consumer perceptions on their water quality or the effect of the CCR/ annual water quality report					We do not use any methods to understand what information consumers would like in their CCR/ annual water quality report								We do not test on the language, format, or other aspects of the CCR/ annual water quality report							We do not conduct publicity outreach regarding our CCR/ annual water quality report		Summary or explanation about information in the CCR	Contact information for the utility		Electronic copy of the CCR				We have not used any electronic delivery methods for our CCR delivery but plan to in the future
South (Region 3)	59860	Record the number of inquiries or comments received about the CCR/annual water quality report	Record the content of inquiries or comments received about the CCR/annual water quality report								Other (please describe below)		Detailed records of all water quality complaints, actions taken, and follow up communications with consumers.				We do not use any methods to understand what information consumers would like in their CCR/ annual water quality report		Change language/wording where applicable	Change format of information (e.g. placement in the report, bulleted items vs. paragraph)	Change format of figures or pictures (e.g. placement in the report, report includes pictures and diagrams vs. includes only text)	Change the amount or type of information that is included in the CCR/annual water quality report					Newsletters (electronic or hard copy) to consumers	Information about the CCR is available on our utility’s website	Announcements to local media outlets like newspapers, radio, or television stations	Social media announcements				Summary or explanation about information in the CCR	Contact information for the utility		Electronic copy of the CCR				We have not used any electronic delivery methods for our CCR delivery and do not plan to in the future
South (Region 3)	125000					We do not track consumer engagement or understanding on the CCR/ annual water quality report						We do not track consumer perceptions on their water quality or the effect of the CCR/ annual water quality report					We do not use any methods to understand what information consumers would like in their CCR/ annual water quality report								We do not test on the language, format, or other aspects of the CCR/ annual water quality report			Information about the CCR is available on our utility’s website						Summary or explanation about information in the CCR	Contact information for the utility	Link(s) to EPA or CDC Consumer Confidence Report information	Electronic copy of the CCR				We have not used any electronic delivery methods for our CCR delivery but plan to in the future
South (Region 3)	200000		Record the content of inquiries or comments received about the CCR/annual water quality report									We do not track consumer perceptions on their water quality or the effect of the CCR/ annual water quality report			We address questions or concerns we have received from consumers								Conduct testing on differences in at least one of these aspects of the CCR/ annual water quality report					Information about the CCR is available on our utility’s website							Contact information for the utility						We have not used any electronic delivery methods for our CCR delivery and do not plan to in the future
South (Region 3)	280000					We do not track consumer engagement or understanding on the CCR/ annual water quality report					Other (please describe below)		We work with a consultant who conducts an anonymous survey on our behalf. This survey includes several factors measuring customer perceptions and overall satisfaction. One of these factors is water quality.		We address questions or concerns we have received from consumers				Change language/wording where applicable	Change format of information (e.g. placement in the report, bulleted items vs. paragraph)	Change format of figures or pictures (e.g. placement in the report, report includes pictures and diagrams vs. includes only text)						Newsletters (electronic or hard copy) to consumers	Information about the CCR is available on our utility’s website	Announcements to local media outlets like newspapers, radio, or television stations	Social media announcements					Contact information for the utility	Link(s) to EPA or CDC Consumer Confidence Report information	Electronic copy of the CCR				We have not used any electronic delivery methods for our CCR delivery but plan to in the future
South (Region 3)	750000	Record the number of inquiries or comments received about the CCR/annual water quality report										We do not track consumer perceptions on their water quality or the effect of the CCR/ annual water quality report			We address questions or concerns we have received from consumers				Change language/wording where applicable								Newsletters (electronic or hard copy) to consumers	Information about the CCR is available on our utility’s website		Social media announcements					Contact information for the utility		Electronic copy of the CCR	Electronic copy of the CCR in a non-English language			We have not used any electronic delivery methods for our CCR delivery and do not plan to in the future
South (Region 3)	16	Record the number of inquiries or comments received about the CCR/annual water quality report										We do not track consumer perceptions on their water quality or the effect of the CCR/ annual water quality report					We do not use any methods to understand what information consumers would like in their CCR/ annual water quality report								We do not test on the language, format, or other aspects of the CCR/ annual water quality report							We do not conduct publicity outreach regarding our CCR/ annual water quality report					Electronic copy of the CCR				Yes, we have used electronic delivery for some or all of our consumer confidence reports/ water quality reports		No, and we do not plan to in the future			We have tracked the number of times the report has been accessed
South (Region 3)	2990					We do not track consumer engagement or understanding on the CCR/ annual water quality report						We do not track consumer perceptions on their water quality or the effect of the CCR/ annual water quality report				Other (please describe below)		The CCR is completed by the [State Agency]. This is done statewide. We would love the "time" and resources (people) to be able to do a more "engaging" CCR, but $$ is a problem.							We do not test on the language, format, or other aspects of the CCR/ annual water quality report							We do not conduct publicity outreach regarding our CCR/ annual water quality report			Contact information for the utility	Link(s) to EPA or CDC Consumer Confidence Report information	Electronic copy of the CCR				Yes, we have used electronic delivery for some or all of our consumer confidence reports/ water quality reports			We would like to, but as long as the State prepares and delivers the CCR, it's very easy to simply post it as is.				We have not tracked or conducted testing on whether electronic delivery has changed consumer feedback, understanding, or perceptions about water quality information in the eCCR
South (Region 3)	179741	Record the number of inquiries or comments received about the CCR/annual water quality report			Other (please describe below)		Track website engagement through Google Analytics, and consumer reach via Facebook.				Other (please describe below)		Focus group and general survey questions every 3 to 5 years.				We do not use any methods to understand what information consumers would like in their CCR/ annual water quality report								We do not test on the language, format, or other aspects of the CCR/ annual water quality report			Information about the CCR is available on our utility’s website	Announcements to local media outlets like newspapers, radio, or television stations	Social media announcements	Other (please describe below)		We place inserts in billing statements and messages on the statements. We also mail color/graphic-driven postcards via a EDDM (Every Door Direct Mail) process as well as post cards mailed directly to account holders with addresses outside of the [City] metro area.	Summary or explanation about information in the CCR	Contact information for the utility	Link(s) to EPA or CDC Consumer Confidence Report information	Electronic copy of the CCR	Electronic copy of the CCR in a non-English language			Yes, we have used electronic delivery for some or all of our consumer confidence reports/ water quality reports		No, and we do not plan to in the future			We have tracked the number of times the report has been accessed
South (Region 3)	450000	Record the number of inquiries or comments received about the CCR/annual water quality report	Record the content of inquiries or comments received about the CCR/annual water quality report									We do not track consumer perceptions on their water quality or the effect of the CCR/ annual water quality report			We address questions or concerns we have received from consumers										We do not test on the language, format, or other aspects of the CCR/ annual water quality report			Information about the CCR is available on our utility’s website							Contact information for the utility	Link(s) to EPA or CDC Consumer Confidence Report information	Electronic copy of the CCR	Electronic copy of the CCR in a non-English language			Yes, we have used electronic delivery for some or all of our consumer confidence reports/ water quality reports		No, and we do not plan to in the future					We have not tracked or conducted testing on whether electronic delivery has changed consumer feedback, understanding, or perceptions about water quality information in the eCCR
South (Region 3)	19000					We do not track consumer engagement or understanding on the CCR/ annual water quality report						We do not track consumer perceptions on their water quality or the effect of the CCR/ annual water quality report					We do not use any methods to understand what information consumers would like in their CCR/ annual water quality report		Change language/wording where applicable	Change format of information (e.g. placement in the report, bulleted items vs. paragraph)	Change format of figures or pictures (e.g. placement in the report, report includes pictures and diagrams vs. includes only text)	Change the amount or type of information that is included in the CCR/annual water quality report						Information about the CCR is available on our utility’s website			Other (please describe below)		We are required to post the availability of the CCR for 3 consecutive months on the water bills.				Electronic copy of the CCR			We have a few printed copies for events and large condos	Yes, we have used electronic delivery for some or all of our consumer confidence reports/ water quality reports			More pictures and our efforts to ensure a safe, high quality and efficient water supply				We have not tracked or conducted testing on whether electronic delivery has changed consumer feedback, understanding, or perceptions about water quality information in the eCCR
South (Region 3)	50000					We do not track consumer engagement or understanding on the CCR/ annual water quality report						We do not track consumer perceptions on their water quality or the effect of the CCR/ annual water quality report					We do not use any methods to understand what information consumers would like in their CCR/ annual water quality report								We do not test on the language, format, or other aspects of the CCR/ annual water quality report			Information about the CCR is available on our utility’s website	Announcements to local media outlets like newspapers, radio, or television stations	Social media announcements	Other (please describe below)		Hard copies of the CCR are available in Customer Service offices [area] wide.	Summary or explanation about information in the CCR	Contact information for the utility	Link(s) to EPA or CDC Consumer Confidence Report information	Electronic copy of the CCR				Yes, we have used electronic delivery for some or all of our consumer confidence reports/ water quality reports		No, and we do not plan to in the future					We have not tracked or conducted testing on whether electronic delivery has changed consumer feedback, understanding, or perceptions about water quality information in the eCCR
South (Region 3)	57000					We do not track consumer engagement or understanding on the CCR/ annual water quality report						We do not track consumer perceptions on their water quality or the effect of the CCR/ annual water quality report			We address questions or concerns we have received from consumers				Change language/wording where applicable	Change format of information (e.g. placement in the report, bulleted items vs. paragraph)	Change format of figures or pictures (e.g. placement in the report, report includes pictures and diagrams vs. includes only text)	Change the amount or type of information that is included in the CCR/annual water quality report					Newsletters (electronic or hard copy) to consumers	Information about the CCR is available on our utility’s website		Social media announcements	Other (please describe below)		Post copies in public areas such as City Hall, Libraries, City Offices, etc.	Summary or explanation about information in the CCR	Contact information for the utility	Link(s) to EPA or CDC Consumer Confidence Report information	Electronic copy of the CCR		Other (please describe below)	Annual averages of chemical analysis for raw and finished water. Current precautionary boil water notices as well as recensions.	Yes, we have used electronic delivery for some or all of our consumer confidence reports/ water quality reports	Not this year, but we plan to in the future				We have tracked the number of times the report has been accessed
South (Region 3)	88000					We do not track consumer engagement or understanding on the CCR/ annual water quality report		Conduct consumer surveys or other methods evaluating consumer confidence in their water quality	Conduct consumer surveys or other methods evaluating specific consumer concerns about their water quality						We address questions or concerns we have received from consumers				Change language/wording where applicable	Change format of information (e.g. placement in the report, bulleted items vs. paragraph)	Change format of figures or pictures (e.g. placement in the report, report includes pictures and diagrams vs. includes only text)	Change the amount or type of information that is included in the CCR/annual water quality report						Information about the CCR is available on our utility’s website		Social media announcements					Contact information for the utility	Link(s) to EPA or CDC Consumer Confidence Report information	Electronic copy of the CCR				Yes, we have used electronic delivery for some or all of our consumer confidence reports/ water quality reports		No, and we do not plan to in the future					We have not tracked or conducted testing on whether electronic delivery has changed consumer feedback, understanding, or perceptions about water quality information in the eCCR
South (Region 3)	96000		Record the content of inquiries or comments received about the CCR/annual water quality report									We do not track consumer perceptions on their water quality or the effect of the CCR/ annual water quality report			We address questions or concerns we have received from consumers				Change language/wording where applicable	Change format of information (e.g. placement in the report, bulleted items vs. paragraph)	Change format of figures or pictures (e.g. placement in the report, report includes pictures and diagrams vs. includes only text)	Change the amount or type of information that is included in the CCR/annual water quality report				We try and change the look and layout of the report annually to give it a new look and continue to provoke interest in the report.		Information about the CCR is available on our utility’s website		Social media announcements	Other (please describe below)		We deliver CCR's to local schools and municipalities in our service area.				Electronic copy of the CCR				Yes, we have used electronic delivery for some or all of our consumer confidence reports/ water quality reports			Our CCR has become more detailed with words and graphic design, while also now being easier to read. Since the report no longer has to be mailed to all customers, it has been spaced out on more pages.				We have not tracked or conducted testing on whether electronic delivery has changed consumer feedback, understanding, or perceptions about water quality information in the eCCR
South (Region 3)	97000	Record the number of inquiries or comments received about the CCR/annual water quality report	Record the content of inquiries or comments received about the CCR/annual water quality report									We do not track consumer perceptions on their water quality or the effect of the CCR/ annual water quality report			We address questions or concerns we have received from consumers				Change language/wording where applicable								Newsletters (electronic or hard copy) to consumers	Information about the CCR is available on our utility’s website		Social media announcements				Summary or explanation about information in the CCR	Contact information for the utility	Link(s) to EPA or CDC Consumer Confidence Report information	Electronic copy of the CCR	Electronic copy of the CCR in a non-English language			Yes, we have used electronic delivery for some or all of our consumer confidence reports/ water quality reports		No, and we do not plan to in the future					We have not tracked or conducted testing on whether electronic delivery has changed consumer feedback, understanding, or perceptions about water quality information in the eCCR
South (Region 3)	97265					We do not track consumer engagement or understanding on the CCR/ annual water quality report						We do not track consumer perceptions on their water quality or the effect of the CCR/ annual water quality report					We do not use any methods to understand what information consumers would like in their CCR/ annual water quality report								We do not test on the language, format, or other aspects of the CCR/ annual water quality report			Information about the CCR is available on our utility’s website						Summary or explanation about information in the CCR	Contact information for the utility		Electronic copy of the CCR				Yes, we have used electronic delivery for some or all of our consumer confidence reports/ water quality reports		No, and we do not plan to in the future					We have not tracked or conducted testing on whether electronic delivery has changed consumer feedback, understanding, or perceptions about water quality information in the eCCR
South (Region 3)	440000					We do not track consumer engagement or understanding on the CCR/ annual water quality report		Conduct consumer surveys or other methods evaluating consumer confidence in their water quality									We do not use any methods to understand what information consumers would like in their CCR/ annual water quality report			Change format of information (e.g. placement in the report, bulleted items vs. paragraph)	Change format of figures or pictures (e.g. placement in the report, report includes pictures and diagrams vs. includes only text)						Newsletters (electronic or hard copy) to consumers	Information about the CCR is available on our utility’s website	Announcements to local media outlets like newspapers, radio, or television stations	Social media announcements				Summary or explanation about information in the CCR			Electronic copy of the CCR	Electronic copy of the CCR in a non-English language			Yes, we have used electronic delivery for some or all of our consumer confidence reports/ water quality reports		No, and we do not plan to in the future					We have not tracked or conducted testing on whether electronic delivery has changed consumer feedback, understanding, or perceptions about water quality information in the eCCR
South (Region 3)	10000					We do not track consumer engagement or understanding on the CCR/ annual water quality report						We do not track consumer perceptions on their water quality or the effect of the CCR/ annual water quality report					We do not use any methods to understand what information consumers would like in their CCR/ annual water quality report								We do not test on the language, format, or other aspects of the CCR/ annual water quality report							We do not conduct publicity outreach regarding our CCR/ annual water quality report			Contact information for the utility	Link(s) to EPA or CDC Consumer Confidence Report information					We have not used any electronic delivery methods for our CCR delivery and do not plan to in the future
South (Region 3)	449316		Record the content of inquiries or comments received about the CCR/annual water quality report								Other (please describe below)		The Customer Service departments takes calls from customers. The call and other pertinent information is documented in the CIS (Customer Information System). Customer concerns regarding water quality are forwarded to the Water Quality Departments.				We do not use any methods to understand what information consumers would like in their CCR/ annual water quality report								We do not test on the language, format, or other aspects of the CCR/ annual water quality report	[Utility] utilizes a CCR Template provided by the regulatory authority.	Newsletters (electronic or hard copy) to consumers	Information about the CCR is available on our utility’s website					The CCR is available on the utility website. Information directing customers to the CCR is provided on utility bills and on a quarterly utility bill insert newsletter.	Summary or explanation about information in the CCR	Contact information for the utility	Link(s) to EPA or CDC Consumer Confidence Report information	Electronic copy of the CCR	Electronic copy of the CCR in a non-English language	Other (please describe below)	Report is provided in English and Spanish versions on the utility website.	Yes, we have used electronic delivery for some or all of our consumer confidence reports/ water quality reports			The 2017 CCR has included the addition of a cover letter and information about our regional water supplier, [Utility Name].				We have not tracked or conducted testing on whether electronic delivery has changed consumer feedback, understanding, or perceptions about water quality information in the eCCR
South (Region 3)	24097					We do not track consumer engagement or understanding on the CCR/ annual water quality report						We do not track consumer perceptions on their water quality or the effect of the CCR/ annual water quality report			We address questions or concerns we have received from consumers				Change language/wording where applicable								Newsletters (electronic or hard copy) to consumers	Information about the CCR is available on our utility’s website						Summary or explanation about information in the CCR	Contact information for the utility						Yes, we have used electronic delivery for some or all of our consumer confidence reports/ water quality reports	Not this year, but we plan to in the future						We have not tracked or conducted testing on whether electronic delivery has changed consumer feedback, understanding, or perceptions about water quality information in the eCCR
South (Region 3)	1200000	Record the number of inquiries or comments received about the CCR/annual water quality report	Record the content of inquiries or comments received about the CCR/annual water quality report	Conduct consumer surveys or other methods that evaluate whether consumers feel they understand the information in the CCR/ annual water quality report				Conduct consumer surveys or other methods evaluating consumer confidence in their water quality	Conduct consumer surveys or other methods evaluating specific consumer concerns about their water quality								We do not use any methods to understand what information consumers would like in their CCR/ annual water quality report		Change language/wording where applicable								Newsletters (electronic or hard copy) to consumers	Information about the CCR is available on our utility’s website	Announcements to local media outlets like newspapers, radio, or television stations	Social media announcements	Other (please describe below)		Distribute at community events			Link(s) to EPA or CDC Consumer Confidence Report information	Electronic copy of the CCR				Yes, we have used electronic delivery for some or all of our consumer confidence reports/ water quality reports		No, and we do not plan to in the future			We have tracked the number of times the report has been accessed
South (Region 3)	270000	Record the number of inquiries or comments received about the CCR/annual water quality report	Record the content of inquiries or comments received about the CCR/annual water quality report				We treat the CCR as more of a small annual report to customers and talk about other opportunities to engage with [Utility Name]- school education program, speakers bureau, bringing our water team to an event, etc. We also track engagement from these requests as well.	Conduct consumer surveys or other methods evaluating consumer confidence in their water quality	Conduct consumer surveys or other methods evaluating specific consumer concerns about their water quality							Other (please describe below)		Our customer survey includes a question about whether customers recall receiving the report.							We do not test on the language, format, or other aspects of the CCR/ annual water quality report		Newsletters (electronic or hard copy) to consumers	Information about the CCR is available on our utility’s website	Announcements to local media outlets like newspapers, radio, or television stations	Social media announcements	Other (please describe below)		We mail multiple copies of the CCR to large employers, schools and universities. We also provide links to elected leaders to use in their newsletters		Contact information for the utility		Electronic copy of the CCR				Yes, we have used electronic delivery for some or all of our consumer confidence reports/ water quality reports			We changed the size of the CCR this year since the majority were supplied through an email on the bill (and sent electronically to those receiving an bill). In the past, the weight of the bill determined the type of paper and size of the report. We plan to do follow-up customer surveys later in the year to look at how many customers recall seeing the info on the bill and going to our website (Of …			Other (please describe below)		See answer in question 11
South (Region 3)	527400	Record the number of inquiries or comments received about the CCR/annual water quality report										We do not track consumer perceptions on their water quality or the effect of the CCR/ annual water quality report			We address questions or concerns we have received from consumers				Change language/wording where applicable	Change format of information (e.g. placement in the report, bulleted items vs. paragraph)		Change the amount or type of information that is included in the CCR/annual water quality report					Newsletters (electronic or hard copy) to consumers	Information about the CCR is available on our utility’s website	Announcements to local media outlets like newspapers, radio, or television stations					Summary or explanation about information in the CCR	Contact information for the utility	Link(s) to EPA or CDC Consumer Confidence Report information	Electronic copy of the CCR				Yes, we have used electronic delivery for some or all of our consumer confidence reports/ water quality reports			Yes, after the LCR rule changed to allow electronic delivery/ web site availability, we were able to design a new CCR.				We have not tracked or conducted testing on whether electronic delivery has changed consumer feedback, understanding, or perceptions about water quality information in the eCCR
South (Region 3)	400000				Other (please describe below)		Monitor feedback on social media outlets, Twitter, Nextdoor and Facebook				Other (please describe below)		Monitor media coverage based on press release announcing the release of the CCR.		We address questions or concerns we have received from consumers					Change format of information (e.g. placement in the report, bulleted items vs. paragraph)	Change format of figures or pictures (e.g. placement in the report, report includes pictures and diagrams vs. includes only text)	Change the amount or type of information that is included in the CCR/annual water quality report					Newsletters (electronic or hard copy) to consumers	Information about the CCR is available on our utility’s website	Announcements to local media outlets like newspapers, radio, or television stations	Social media announcements	Other (please describe below)		Community liaisons distribute CCRs at neighborhood meetings and events.	Summary or explanation about information in the CCR	Contact information for the utility		Electronic copy of the CCR				Yes, we have used electronic delivery for some or all of our consumer confidence reports/ water quality reports		No, and we do not plan to in the future			We have tracked the number of times the report has been accessed			Monitor number of 311 requests that we receive for printed copies of the report.
South (Region 3)	55000					We do not track consumer engagement or understanding on the CCR/ annual water quality report						We do not track consumer perceptions on their water quality or the effect of the CCR/ annual water quality report	We do keep tract of Water Quality reports or questions. Flushing or sampling				We do not use any methods to understand what information consumers would like in their CCR/ annual water quality report								We do not test on the language, format, or other aspects of the CCR/ annual water quality report		Newsletters (electronic or hard copy) to consumers	Information about the CCR is available on our utility’s website								Link(s) to EPA or CDC Consumer Confidence Report information	Electronic copy of the CCR				Yes, we have used electronic delivery for some or all of our consumer confidence reports/ water quality reports	Not this year, but we plan to in the future						We have not tracked or conducted testing on whether electronic delivery has changed consumer feedback, understanding, or perceptions about water quality information in the eCCR
South (Region 3)	189600	Record the number of inquiries or comments received about the CCR/annual water quality report			Other (please describe below)		Track how many times website is visited					We do not track consumer perceptions on their water quality or the effect of the CCR/ annual water quality report			We address questions or concerns we have received from consumers	Other (please describe below)		We also cover hot topics or information we feel consumers should know	Change language/wording where applicable	Change format of information (e.g. placement in the report, bulleted items vs. paragraph)	Change format of figures or pictures (e.g. placement in the report, report includes pictures and diagrams vs. includes only text)	Change the amount or type of information that is included in the CCR/annual water quality report					Newsletters (electronic or hard copy) to consumers	Information about the CCR is available on our utility’s website	Announcements to local media outlets like newspapers, radio, or television stations	Social media announcements	Other (please describe below)		Message on payment portal, email to customers who have provided their email address, posting in public places	Summary or explanation about information in the CCR	Contact information for the utility		Electronic copy of the CCR				Yes, we have used electronic delivery for some or all of our consumer confidence reports/ water quality reports			Space is not an issue when you aren't paying for printing for all consumers. Therefore, we were able to add more helpful information and photos.		We have tracked the number of times the report has been accessed
South (Region 3)	275000	Record the number of inquiries or comments received about the CCR/annual water quality report	Record the content of inquiries or comments received about the CCR/annual water quality report	Conduct consumer surveys or other methods that evaluate whether consumers feel they understand the information in the CCR/ annual water quality report	Other (please describe below)		Engaging with customers about our report through in-person/public events and online/social media. We also provide digital versions for viewing/downloading, and hard copies that we give away at events and provide to customers who request them. Our digital and hard copies are available in English and Spanish language.	Conduct consumer surveys or other methods evaluating consumer confidence in their water quality	Conduct consumer surveys or other methods evaluating specific consumer concerns about their water quality	Conduct consumer surveys or other methods that evaluate the effect of the CCR/ annual water quality report on consumer confidence	Other (please describe below)		Again, we actively engage with our customers all year long, in person via public events and online via social media. We always take hard copies of our report to give away, and we boost/promote social media posts encouraging customers to browse our reports online and learn more about their water.		We address questions or concerns we have received from consumers	Other (please describe below)		We have worked with consultants, and also reach out to colleagues in other utilities and review their own reports, in an effort to understand best practices while also including the required information.	Change language/wording where applicable	Change format of information (e.g. placement in the report, bulleted items vs. paragraph)	Change format of figures or pictures (e.g. placement in the report, report includes pictures and diagrams vs. includes only text)	Change the amount or type of information that is included in the CCR/annual water quality report	Conduct testing on differences in at least one of these aspects of the CCR/ annual water quality report				Newsletters (electronic or hard copy) to consumers	Information about the CCR is available on our utility’s website	Announcements to local media outlets like newspapers, radio, or television stations	Social media announcements	Other (please describe below)		Proclamations with the Mayor during City Council meetings when the latest report is published; paid advertising in broadcast/print/digital; direct promotions at various departmental/City public events; posts on neighborhood listservs, platforms such as Nextdoor, HOA newsletters, etc.	Summary or explanation about information in the CCR	Contact information for the utility	Link(s) to EPA or CDC Consumer Confidence Report information	Electronic copy of the CCR	Electronic copy of the CCR in a non-English language			Yes, we have used electronic delivery for some or all of our consumer confidence reports/ water quality reports			We no longer have a mailing panel on the report, which provides more space for relevant photography and other drinking water-specific content.		We have tracked the number of times the report has been accessed			Thanks to electronic availability, we have witnessed a noted increase of customers approach us in person and online, stating they have read the report online instead of requesting a hard copy by mail.
South (Region 3)	471000					We do not track consumer engagement or understanding on the CCR/ annual water quality report	We do not currently track information specifically targeting understanding/engagement of the CCR, however we do track engagement and understanding of customers' knowledge of drinking water quality in general.	Conduct consumer surveys or other methods evaluating consumer confidence in their water quality							We address questions or concerns we have received from consumers				Change language/wording where applicable	Change format of information (e.g. placement in the report, bulleted items vs. paragraph)	Change format of figures or pictures (e.g. placement in the report, report includes pictures and diagrams vs. includes only text)							Information about the CCR is available on our utility’s website	Announcements to local media outlets like newspapers, radio, or television stations	Social media announcements	Other (please describe below)		Email notifications to paperless billing customers.		Contact information for the utility		Electronic copy of the CCR	Electronic copy of the CCR in a non-English language			Yes, we have used electronic delivery for some or all of our consumer confidence reports/ water quality reports	Not this year, but we plan to in the future		We have considered adding more to the CCR page on our website that gives more detailed information about our utility. This objective was not a part of our 2017-2018 Communications plan, but the consideration will be revisited for 2018-2019.		We have tracked the number of times the report has been accessed			We track the number of times the report has been accessed through our electronic link sent to paperless billing customers.
South (Region 3)	631000	Record the number of inquiries or comments received about the CCR/annual water quality report										We do not track consumer perceptions on their water quality or the effect of the CCR/ annual water quality report			We address questions or concerns we have received from consumers				Change language/wording where applicable	Change format of information (e.g. placement in the report, bulleted items vs. paragraph)							Newsletters (electronic or hard copy) to consumers	Information about the CCR is available on our utility’s website			Other (please describe below)		We post copies of the CCR in all metro libraries	Summary or explanation about information in the CCR	Contact information for the utility		Electronic copy of the CCR				Yes, we have used electronic delivery for some or all of our consumer confidence reports/ water quality reports
South (Region 3)	23000					We do not track consumer engagement or understanding on the CCR/ annual water quality report						We do not track consumer perceptions on their water quality or the effect of the CCR/ annual water quality report					We do not use any methods to understand what information consumers would like in their CCR/ annual water quality report								We do not test on the language, format, or other aspects of the CCR/ annual water quality report				Announcements to local media outlets like newspapers, radio, or television stations					Summary or explanation about information in the CCR	Contact information for the utility	Link(s) to EPA or CDC Consumer Confidence Report information	Electronic copy of the CCR				Yes, we have used electronic delivery for some or all of our consumer confidence reports/ water quality reports		No, and we do not plan to in the future					We have not tracked or conducted testing on whether electronic delivery has changed consumer feedback, understanding, or perceptions about water quality information in the eCCR
South (Region 3)	90000	Record the number of inquiries or comments received about the CCR/annual water quality report	Record the content of inquiries or comments received about the CCR/annual water quality report		Other (please describe below)		Evaluate web analytics for number of views, time spent on sites, and number of online inquiries.	Conduct consumer surveys or other methods evaluating consumer confidence in their water quality							We address questions or concerns we have received from consumers	Other (please describe below)		We receive input from our Citizens Water Academy participants.	Change language/wording where applicable	Change format of information (e.g. placement in the report, bulleted items vs. paragraph)	Change format of figures or pictures (e.g. placement in the report, report includes pictures and diagrams vs. includes only text)	Change the amount or type of information that is included in the CCR/annual water quality report					Newsletters (electronic or hard copy) to consumers	Information about the CCR is available on our utility’s website	Announcements to local media outlets like newspapers, radio, or television stations	Social media announcements							Electronic copy of the CCR				Yes, we have used electronic delivery for some or all of our consumer confidence reports/ water quality reports			Provide a significant of new and expanded detail				We have not tracked or conducted testing on whether electronic delivery has changed consumer feedback, understanding, or perceptions about water quality information in the eCCR
South (Region 3)	118000	Record the number of inquiries or comments received about the CCR/annual water quality report						Conduct consumer surveys or other methods evaluating consumer confidence in their water quality	Conduct consumer surveys or other methods evaluating specific consumer concerns about their water quality									We utilize customer service survey feedback which tells us that our customers want education and communication, so we enlarged our CCR as a part of our response.	Change language/wording where applicable	Change format of information (e.g. placement in the report, bulleted items vs. paragraph)	Change format of figures or pictures (e.g. placement in the report, report includes pictures and diagrams vs. includes only text)	Change the amount or type of information that is included in the CCR/annual water quality report			We do not test on the language, format, or other aspects of the CCR/ annual water quality report		Newsletters (electronic or hard copy) to consumers	Information about the CCR is available on our utility’s website	Announcements to local media outlets like newspapers, radio, or television stations	Social media announcements			Placed on website homepage as a "News" feature story.	Summary or explanation about information in the CCR	Contact information for the utility		Electronic copy of the CCR				Yes, we have used electronic delivery for some or all of our consumer confidence reports/ water quality reports			We went from a 4-panel tabloid size booklet to a 9-panel poster format this year.				We have not tracked or conducted testing on whether electronic delivery has changed consumer feedback, understanding, or perceptions about water quality information in the eCCR
South (Region 3)	5353					We do not track consumer engagement or understanding on the CCR/ annual water quality report						We do not track consumer perceptions on their water quality or the effect of the CCR/ annual water quality report					We do not use any methods to understand what information consumers would like in their CCR/ annual water quality report								We do not test on the language, format, or other aspects of the CCR/ annual water quality report		Newsletters (electronic or hard copy) to consumers	Information about the CCR is available on our utility’s website	Announcements to local media outlets like newspapers, radio, or television stations	Social media announcements					Contact information for the utility	Link(s) to EPA or CDC Consumer Confidence Report information	Electronic copy of the CCR				Yes, we have used electronic delivery for some or all of our consumer confidence reports/ water quality reports		No, and we do not plan to in the future					We have not tracked or conducted testing on whether electronic delivery has changed consumer feedback, understanding, or perceptions about water quality information in the eCCR
South (Region 3)	9500	Record the number of inquiries or comments received about the CCR/annual water quality report										We do not track consumer perceptions on their water quality or the effect of the CCR/ annual water quality report					We do not use any methods to understand what information consumers would like in their CCR/ annual water quality report								We do not test on the language, format, or other aspects of the CCR/ annual water quality report			Information about the CCR is available on our utility’s website			Other (please describe below)		The link to the web page is printed on all customers bills.		Contact information for the utility		Electronic copy of the CCR				Yes, we have used electronic delivery for some or all of our consumer confidence reports/ water quality reports		No, and we do not plan to in the future					We have not tracked or conducted testing on whether electronic delivery has changed consumer feedback, understanding, or perceptions about water quality information in the eCCR
South (Region 3)	30123		Record the content of inquiries or comments received about the CCR/annual water quality report						Conduct consumer surveys or other methods evaluating specific consumer concerns about their water quality								We do not use any methods to understand what information consumers would like in their CCR/ annual water quality report		Change language/wording where applicable	Change format of information (e.g. placement in the report, bulleted items vs. paragraph)							Newsletters (electronic or hard copy) to consumers	Information about the CCR is available on our utility’s website	Announcements to local media outlets like newspapers, radio, or television stations	Social media announcements							Electronic copy of the CCR				Yes, we have used electronic delivery for some or all of our consumer confidence reports/ water quality reports	Not this year, but we plan to in the future						We have not tracked or conducted testing on whether electronic delivery has changed consumer feedback, understanding, or perceptions about water quality information in the eCCR
South (Region 3)	38000	Record the number of inquiries or comments received about the CCR/annual water quality report									Other (please describe below)		We communicate our water quality daily and receive on average 12 water quality complaints per year. We conduct tours of the facility with schools (grade 1 - 12, colleges and university local, and professional organizations). Large customers that would like a tour are also given a tour.				We do not use any methods to understand what information consumers would like in their CCR/ annual water quality report								We do not test on the language, format, or other aspects of the CCR/ annual water quality report			Information about the CCR is available on our utility’s website	Announcements to local media outlets like newspapers, radio, or television stations	Social media announcements					Contact information for the utility		Electronic copy of the CCR				Yes, we have used electronic delivery for some or all of our consumer confidence reports/ water quality reports		No, and we do not plan to in the future			We have tracked the number of times the report has been accessed
South (Region 3)	67000	Record the number of inquiries or comments received about the CCR/annual water quality report	Record the content of inquiries or comments received about the CCR/annual water quality report			We do not track consumer engagement or understanding on the CCR/ annual water quality report						We do not track consumer perceptions on their water quality or the effect of the CCR/ annual water quality report			We address questions or concerns we have received from consumers				Change language/wording where applicable	Change format of information (e.g. placement in the report, bulleted items vs. paragraph)		Change the amount or type of information that is included in the CCR/annual water quality report					Newsletters (electronic or hard copy) to consumers	Information about the CCR is available on our utility’s website	Announcements to local media outlets like newspapers, radio, or television stations	Social media announcements				Summary or explanation about information in the CCR	Contact information for the utility	Link(s) to EPA or CDC Consumer Confidence Report information	Electronic copy of the CCR				Yes, we have used electronic delivery for some or all of our consumer confidence reports/ water quality reports		No, and we do not plan to in the future					We have not tracked or conducted testing on whether electronic delivery has changed consumer feedback, understanding, or perceptions about water quality information in the eCCR
South (Region 3)	105000					We do not track consumer engagement or understanding on the CCR/ annual water quality report						We do not track consumer perceptions on their water quality or the effect of the CCR/ annual water quality report			We address questions or concerns we have received from consumers					Change format of information (e.g. placement in the report, bulleted items vs. paragraph)	Change format of figures or pictures (e.g. placement in the report, report includes pictures and diagrams vs. includes only text)						Newsletters (electronic or hard copy) to consumers	Information about the CCR is available on our utility’s website			Other (please describe below)		Place wording on the water bills as required by the [State Regulator]	Summary or explanation about information in the CCR	Contact information for the utility	Link(s) to EPA or CDC Consumer Confidence Report information	Electronic copy of the CCR				Yes, we have used electronic delivery for some or all of our consumer confidence reports/ water quality reports		No, and we do not plan to in the future					We have not tracked or conducted testing on whether electronic delivery has changed consumer feedback, understanding, or perceptions about water quality information in the eCCR
South (Region 3)	680		Record the content of inquiries or comments received about the CCR/annual water quality report						Conduct consumer surveys or other methods evaluating specific consumer concerns about their water quality								We do not use any methods to understand what information consumers would like in their CCR/ annual water quality report								We do not test on the language, format, or other aspects of the CCR/ annual water quality report	[State Regulator] is strict on the wording and presentation of information.	Newsletters (electronic or hard copy) to consumers									Link(s) to EPA or CDC Consumer Confidence Report information	Electronic copy of the CCR				Yes, we have used electronic delivery for some or all of our consumer confidence reports/ water quality reports		No, and we do not plan to in the future			We have tracked the number of times the report has been accessed
South (Region 3)	14500					We do not track consumer engagement or understanding on the CCR/ annual water quality report						We do not track consumer perceptions on their water quality or the effect of the CCR/ annual water quality report			We address questions or concerns we have received from consumers										We do not test on the language, format, or other aspects of the CCR/ annual water quality report							We do not conduct publicity outreach regarding our CCR/ annual water quality report		Summary or explanation about information in the CCR	Contact information for the utility	Link(s) to EPA or CDC Consumer Confidence Report information	Electronic copy of the CCR				Yes, we have used electronic delivery for some or all of our consumer confidence reports/ water quality reports		No, and we do not plan to in the future					We have not tracked or conducted testing on whether electronic delivery has changed consumer feedback, understanding, or perceptions about water quality information in the eCCR
South (Region 3)	20000					We do not track consumer engagement or understanding on the CCR/ annual water quality report						We do not track consumer perceptions on their water quality or the effect of the CCR/ annual water quality report					We do not use any methods to understand what information consumers would like in their CCR/ annual water quality report								We do not test on the language, format, or other aspects of the CCR/ annual water quality report			Information about the CCR is available on our utility’s website							Contact information for the utility		Electronic copy of the CCR				Yes, we have used electronic delivery for some or all of our consumer confidence reports/ water quality reports		No, and we do not plan to in the future					We have not tracked or conducted testing on whether electronic delivery has changed consumer feedback, understanding, or perceptions about water quality information in the eCCR
South (Region 3)	34650					We do not track consumer engagement or understanding on the CCR/ annual water quality report						We do not track consumer perceptions on their water quality or the effect of the CCR/ annual water quality report				Other (please describe below)		What information can we provide customers other than what is required? We try not to make our report too long but nearly all of the content, if not specific language, is mandated by EPA and/or our state environmental agency.	Change language/wording where applicable	Change format of information (e.g. placement in the report, bulleted items vs. paragraph)	Change format of figures or pictures (e.g. placement in the report, report includes pictures and diagrams vs. includes only text)			Other (please describe below)		In recent reports we have added a table detailing the testing frequency (daily/monthly/annually/etc.) for different groups of contaminants.	Newsletters (electronic or hard copy) to consumers	Information about the CCR is available on our utility’s website	Announcements to local media outlets like newspapers, radio, or television stations	Social media announcements					Contact information for the utility	Link(s) to EPA or CDC Consumer Confidence Report information	Electronic copy of the CCR				Yes, we have used electronic delivery for some or all of our consumer confidence reports/ water quality reports			Added the table on testing frequency of groups of contaminants. We've also added pictures and "factoid" about the utility. We still try to limit its length, however, because the electronic version is a PDF.				We have not tracked or conducted testing on whether electronic delivery has changed consumer feedback, understanding, or perceptions about water quality information in the eCCR
South (Region 3)	37000					We do not track consumer engagement or understanding on the CCR/ annual water quality report						We do not track consumer perceptions on their water quality or the effect of the CCR/ annual water quality report					We do not use any methods to understand what information consumers would like in their CCR/ annual water quality report								We do not test on the language, format, or other aspects of the CCR/ annual water quality report		Newsletters (electronic or hard copy) to consumers	Information about the CCR is available on our utility’s website							Contact information for the utility		Electronic copy of the CCR				Yes, we have used electronic delivery for some or all of our consumer confidence reports/ water quality reports	Not this year, but we plan to in the future						We have not tracked or conducted testing on whether electronic delivery has changed consumer feedback, understanding, or perceptions about water quality information in the eCCR
South (Region 3)	39271	Record the number of inquiries or comments received about the CCR/annual water quality report			Other (please describe below)		Track number of hits to the CCR webpage					We do not track consumer perceptions on their water quality or the effect of the CCR/ annual water quality report			We address questions or concerns we have received from consumers						Change format of figures or pictures (e.g. placement in the report, report includes pictures and diagrams vs. includes only text)				We do not test on the language, format, or other aspects of the CCR/ annual water quality report			Information about the CCR is available on our utility’s website			Other (please describe below)		Direct mail to all mailing addresses in our service area promoting CCR and water quality website.	Summary or explanation about information in the CCR	Contact information for the utility		Electronic copy of the CCR				Yes, we have used electronic delivery for some or all of our consumer confidence reports/ water quality reports			Our CCR increased to 20 pages (from 4 pages) when we changed to electronic delivery. Our 2017 CCR was 30 pages (we annexed to [additional] water systems and had to add [additional] data tables. Publishing electronically allows us to provide more information on the services we provide: photos of people, water treatment graphics, a map, statistical information (miles of pipe, annual demand, system …		We have tracked the number of times the report has been accessed	Other (please describe below)		We track the number requests for a printed copies.
South (Region 3)	80000					We do not track consumer engagement or understanding on the CCR/ annual water quality report					Other (please describe below)		Track calls that come regarding water quality queries				We do not use any methods to understand what information consumers would like in their CCR/ annual water quality report								We do not test on the language, format, or other aspects of the CCR/ annual water quality report			Information about the CCR is available on our utility’s website	Announcements to local media outlets like newspapers, radio, or television stations					Summary or explanation about information in the CCR	Contact information for the utility		Electronic copy of the CCR				We have not used any electronic delivery methods for our CCR delivery and do not plan to in the future
South (Region 3)	104143					We do not track consumer engagement or understanding on the CCR/ annual water quality report						We do not track consumer perceptions on their water quality or the effect of the CCR/ annual water quality report			We address questions or concerns we have received from consumers			We have intentionally provided more graphic data to provide information in a succinct format and in a way that our customers can readily identify with regarding the purchase of water in comparison with other day-to-day products. We write articles and include information that helps folks understand the types of expenses that are incurred in order to treat and transport water to the customer reside…		Change format of information (e.g. placement in the report, bulleted items vs. paragraph)	Change format of figures or pictures (e.g. placement in the report, report includes pictures and diagrams vs. includes only text)	Change the amount or type of information that is included in the CCR/annual water quality report			We do not test on the language, format, or other aspects of the CCR/ annual water quality report	Again, we employ graphics that convey the most important messages at a glance and more descriptive articles so that a customer can delve into the information for more in-depth understanding.	Newsletters (electronic or hard copy) to consumers	Information about the CCR is available on our utility’s website		Social media announcements	Other (please describe below)		Posting CCR availability on the water bill	Summary or explanation about information in the CCR	Contact information for the utility		Electronic copy of the CCR				Yes, we have used electronic delivery for some or all of our consumer confidence reports/ water quality reports		No, and we do not plan to in the future	We have always included information we feel is appropriate, regardless of the space required to do so.				We have not tracked or conducted testing on whether electronic delivery has changed consumer feedback, understanding, or perceptions about water quality information in the eCCR
South (Region 3)	132000					We do not track consumer engagement or understanding on the CCR/ annual water quality report						We do not track consumer perceptions on their water quality or the effect of the CCR/ annual water quality report			We address questions or concerns we have received from consumers										We do not test on the language, format, or other aspects of the CCR/ annual water quality report							We do not conduct publicity outreach regarding our CCR/ annual water quality report					Electronic copy of the CCR				Yes, we have used electronic delivery for some or all of our consumer confidence reports/ water quality reports			Space is a consideration as we use paper delivery.				We have not tracked or conducted testing on whether electronic delivery has changed consumer feedback, understanding, or perceptions about water quality information in the eCCR
South (Region 3)	325000	Record the number of inquiries or comments received about the CCR/annual water quality report	Record the content of inquiries or comments received about the CCR/annual water quality report		Other (please describe below)		We hold two public meetings each year for customers to attend and ask questions about the content of the CCRs.					We do not track consumer perceptions on their water quality or the effect of the CCR/ annual water quality report			We address questions or concerns we have received from consumers					Change format of information (e.g. placement in the report, bulleted items vs. paragraph)		Change the amount or type of information that is included in the CCR/annual water quality report						Information about the CCR is available on our utility’s website		Social media announcements	Other (please describe below)		Hold two annual meetings for the public to attend. Based on questions at the meetings, we may choose to adjust future CCRs.		Contact information for the utility		Electronic copy of the CCR	Electronic copy of the CCR in a non-English language			Yes, we have used electronic delivery for some or all of our consumer confidence reports/ water quality reports		No, and we do not plan to in the future					We have not tracked or conducted testing on whether electronic delivery has changed consumer feedback, understanding, or perceptions about water quality information in the eCCR
South (Region 3)	1200000	Record the number of inquiries or comments received about the CCR/annual water quality report	Record the content of inquiries or comments received about the CCR/annual water quality report								Other (please describe below)		Based on 311 inquiries				We do not use any methods to understand what information consumers would like in their CCR/ annual water quality report		Change language/wording where applicable	Change format of information (e.g. placement in the report, bulleted items vs. paragraph)		Change the amount or type of information that is included in the CCR/annual water quality report						Information about the CCR is available on our utility’s website		Social media announcements				Summary or explanation about information in the CCR	Contact information for the utility	Link(s) to EPA or CDC Consumer Confidence Report information	Electronic copy of the CCR				Yes, we have used electronic delivery for some or all of our consumer confidence reports/ water quality reports	Not this year, but we plan to in the future						We have not tracked or conducted testing on whether electronic delivery has changed consumer feedback, understanding, or perceptions about water quality information in the eCCR
South (Region 3)	2000000			Conduct consumer surveys or other methods that evaluate whether consumers feel they understand the information in the CCR/ annual water quality report				Conduct consumer surveys or other methods evaluating consumer confidence in their water quality							We address questions or concerns we have received from consumers				Change language/wording where applicable										Announcements to local media outlets like newspapers, radio, or television stations					Summary or explanation about information in the CCR	Contact information for the utility	Link(s) to EPA or CDC Consumer Confidence Report information	Electronic copy of the CCR	Electronic copy of the CCR in a non-English language			Yes, we have used electronic delivery for some or all of our consumer confidence reports/ water quality reports
South (Region 3)	8089					We do not track consumer engagement or understanding on the CCR/ annual water quality report						We do not track consumer perceptions on their water quality or the effect of the CCR/ annual water quality report			We address questions or concerns we have received from consumers										We do not test on the language, format, or other aspects of the CCR/ annual water quality report			Information about the CCR is available on our utility’s website	Announcements to local media outlets like newspapers, radio, or television stations					Summary or explanation about information in the CCR	Contact information for the utility		Electronic copy of the CCR				Yes, we have used electronic delivery for some or all of our consumer confidence reports/ water quality reports		No, and we do not plan to in the future					We have not tracked or conducted testing on whether electronic delivery has changed consumer feedback, understanding, or perceptions about water quality information in the eCCR
South (Region 3)	20905					We do not track consumer engagement or understanding on the CCR/ annual water quality report		Conduct consumer surveys or other methods evaluating consumer confidence in their water quality					General County survey conducted every three years includes questions related to perception of water quality/utility performance.		We address questions or concerns we have received from consumers										We do not test on the language, format, or other aspects of the CCR/ annual water quality report			Information about the CCR is available on our utility’s website			Other (please describe below)		Information on customer bills.	Summary or explanation about information in the CCR	Contact information for the utility		Electronic copy of the CCR				Yes, we have used electronic delivery for some or all of our consumer confidence reports/ water quality reports			More flexibility to provide additional detail. This has been a slow transition as we address questions/inquiries we receive in future CCR's or requests for changes from regulators.				We have not tracked or conducted testing on whether electronic delivery has changed consumer feedback, understanding, or perceptions about water quality information in the eCCR
South (Region 3)	61000	Record the number of inquiries or comments received about the CCR/annual water quality report	Record the content of inquiries or comments received about the CCR/annual water quality report									We do not track consumer perceptions on their water quality or the effect of the CCR/ annual water quality report			We address questions or concerns we have received from consumers			We use the CCR at community events, tours and presentations. Customer feedback is used as we design the next year's report.	Change language/wording where applicable	Change format of information (e.g. placement in the report, bulleted items vs. paragraph)	Change format of figures or pictures (e.g. placement in the report, report includes pictures and diagrams vs. includes only text)	Change the amount or type of information that is included in the CCR/annual water quality report						Information about the CCR is available on our utility’s website		Social media announcements	Other (please describe below)		The CCR is shared at community events, tours and presentations.	Summary or explanation about information in the CCR	Contact information for the utility	Link(s) to EPA or CDC Consumer Confidence Report information	Electronic copy of the CCR				Yes, we have used electronic delivery for some or all of our consumer confidence reports/ water quality reports			We added information about our dam inundation plans. We also have been able to add more photos and expanded charts to make the report have more of a magazine feel.		We have tracked the number of times the report has been accessed
South (Region 3)	67000	Record the number of inquiries or comments received about the CCR/annual water quality report									Other (please describe below)		We utilize Citiworks database to record customer complaints and questions about water quality.				We do not use any methods to understand what information consumers would like in their CCR/ annual water quality report							Other (please describe below)		We offer two formats for our CCR. The customer can view the full page online report, or the information can be seen in brochure format.		Information about the CCR is available on our utility’s website			Other (please describe below)		The CCR is announced and the URL is on the customers' bills for May and June.				Electronic copy of the CCR				Yes, we have used electronic delivery for some or all of our consumer confidence reports/ water quality reports			We only included mandatory data prior to electronic delivery. Now we include summaries of all data.				We have not tracked or conducted testing on whether electronic delivery has changed consumer feedback, understanding, or perceptions about water quality information in the eCCR
South (Region 3)	67000	Record the number of inquiries or comments received about the CCR/annual water quality report									Other (please describe below)		Log in consumer calls as inquiries/complaints.		We address questions or concerns we have received from consumers										We do not test on the language, format, or other aspects of the CCR/ annual water quality report			Information about the CCR is available on our utility’s website	Announcements to local media outlets like newspapers, radio, or television stations		Other (please describe below)		Print copies are made available at the libraries and recreation/senior centers				Electronic copy of the CCR				Yes, we have used electronic delivery for some or all of our consumer confidence reports/ water quality reports		No, and we do not plan to in the future					We have not tracked or conducted testing on whether electronic delivery has changed consumer feedback, understanding, or perceptions about water quality information in the eCCR
South (Region 3)	73400	Record the number of inquiries or comments received about the CCR/annual water quality report	Record the content of inquiries or comments received about the CCR/annual water quality report		Other (please describe below)		Record the number of website views ("hits").				Other (please describe below)		We track customers contact (via social media, e-mail or phone) of water quality complaints, concerns or questions.		We address questions or concerns we have received from consumers				Change language/wording where applicable	Change format of information (e.g. placement in the report, bulleted items vs. paragraph)	Change format of figures or pictures (e.g. placement in the report, report includes pictures and diagrams vs. includes only text)	Change the amount or type of information that is included in the CCR/annual water quality report					Newsletters (electronic or hard copy) to consumers	Information about the CCR is available on our utility’s website	Announcements to local media outlets like newspapers, radio, or television stations	Social media announcements					Contact information for the utility	Link(s) to EPA or CDC Consumer Confidence Report information	Electronic copy of the CCR				Yes, we have used electronic delivery for some or all of our consumer confidence reports/ water quality reports		No, and we do not plan to in the future			We have tracked the number of times the report has been accessed
South (Region 3)	79000	Record the number of inquiries or comments received about the CCR/annual water quality report	Record the content of inquiries or comments received about the CCR/annual water quality report									We do not track consumer perceptions on their water quality or the effect of the CCR/ annual water quality report			We address questions or concerns we have received from consumers				Change language/wording where applicable								Newsletters (electronic or hard copy) to consumers	Information about the CCR is available on our utility’s website		Social media announcements				Summary or explanation about information in the CCR	Contact information for the utility	Link(s) to EPA or CDC Consumer Confidence Report information	Electronic copy of the CCR	Electronic copy of the CCR in a non-English language			Yes, we have used electronic delivery for some or all of our consumer confidence reports/ water quality reports		No, and we do not plan to in the future			We have tracked the number of times the report has been accessed
South (Region 3)	100000		Record the content of inquiries or comments received about the CCR/annual water quality report		Other (please describe below)		We mail hard copies of the report to customers who ask for one and we keep records of who requested one. Also, I will take note if consumers seem to think that our releasing of the CCR indicates that there is or was something wrong with the water.				Other (please describe below)		We record all water quality related complaints.				We do not use any methods to understand what information consumers would like in their CCR/ annual water quality report				Change format of figures or pictures (e.g. placement in the report, report includes pictures and diagrams vs. includes only text)	Change the amount or type of information that is included in the CCR/annual water quality report					Newsletters (electronic or hard copy) to consumers	Information about the CCR is available on our utility’s website						Summary or explanation about information in the CCR	Contact information for the utility		Electronic copy of the CCR				Yes, we have used electronic delivery for some or all of our consumer confidence reports/ water quality reports		No, and we do not plan to in the future			We have tracked the number of times the report has been accessed
South (Region 3)	100001	Record the number of inquiries or comments received about the CCR/annual water quality report											We based it off of call ins. Customers contacting us				We do not use any methods to understand what information consumers would like in their CCR/ annual water quality report								We do not test on the language, format, or other aspects of the CCR/ annual water quality report			Information about the CCR is available on our utility’s website			Other (please describe below)		We also print some copies and place them in the public libraries. In times pass we use the public TV station to inform the public about the CCR	Summary or explanation about information in the CCR	Contact information for the utility	Link(s) to EPA or CDC Consumer Confidence Report information	Electronic copy of the CCR				Yes, we have used electronic delivery for some or all of our consumer confidence reports/ water quality reports			Every year we try to add and article that we believe will be helpful to the public based off of the complaint we might have received in the pass.				We have not tracked or conducted testing on whether electronic delivery has changed consumer feedback, understanding, or perceptions about water quality information in the eCCR
South (Region 3)	135000	Record the number of inquiries or comments received about the CCR/annual water quality report	Record the content of inquiries or comments received about the CCR/annual water quality report									We do not track consumer perceptions on their water quality or the effect of the CCR/ annual water quality report			We address questions or concerns we have received from consumers				Change language/wording where applicable		Change format of figures or pictures (e.g. placement in the report, report includes pictures and diagrams vs. includes only text)	Change the amount or type of information that is included in the CCR/annual water quality report					Newsletters (electronic or hard copy) to consumers	Information about the CCR is available on our utility’s website		Social media announcements				Summary or explanation about information in the CCR	Contact information for the utility	Link(s) to EPA or CDC Consumer Confidence Report information	Electronic copy of the CCR				Yes, we have used electronic delivery for some or all of our consumer confidence reports/ water quality reports		No, and we do not plan to in the future			We have tracked the number of times the report has been accessed
South (Region 3)	400000					We do not track consumer engagement or understanding on the CCR/ annual water quality report						We do not track consumer perceptions on their water quality or the effect of the CCR/ annual water quality report			We address questions or concerns we have received from consumers										We do not test on the language, format, or other aspects of the CCR/ annual water quality report		Newsletters (electronic or hard copy) to consumers	Information about the CCR is available on our utility’s website		Social media announcements				Summary or explanation about information in the CCR	Contact information for the utility	Link(s) to EPA or CDC Consumer Confidence Report information	Electronic copy of the CCR				Yes, we have used electronic delivery for some or all of our consumer confidence reports/ water quality reports			We have changed from a folded brochure to a booklet format, increased font size, and included more graphics and white space.				We have not tracked or conducted testing on whether electronic delivery has changed consumer feedback, understanding, or perceptions about water quality information in the eCCR
South (Region 3)	1000000	Record the number of inquiries or comments received about the CCR/annual water quality report	Record the content of inquiries or comments received about the CCR/annual water quality report		Other (please describe below)		Track online activity					We do not track consumer perceptions on their water quality or the effect of the CCR/ annual water quality report			We address questions or concerns we have received from consumers				Change language/wording where applicable	Change format of information (e.g. placement in the report, bulleted items vs. paragraph)		Change the amount or type of information that is included in the CCR/annual water quality report					Newsletters (electronic or hard copy) to consumers	Information about the CCR is available on our utility’s website	Announcements to local media outlets like newspapers, radio, or television stations	Social media announcements	Other (please describe below)		Postcard to each mailing address in service area telling customers how to request a paper copy and giving them direct web link.	Summary or explanation about information in the CCR			Electronic copy of the CCR				Yes, we have used electronic delivery for some or all of our consumer confidence reports/ water quality reports		No, and we do not plan to in the future
South (Region 3)	36000					We do not track consumer engagement or understanding on the CCR/ annual water quality report						We do not track consumer perceptions on their water quality or the effect of the CCR/ annual water quality report					We do not use any methods to understand what information consumers would like in their CCR/ annual water quality report								We do not test on the language, format, or other aspects of the CCR/ annual water quality report			Information about the CCR is available on our utility’s website			Other (please describe below)		Information relative to CCR is placed on utility bills		Contact information for the utility		Electronic copy of the CCR				We have not used any electronic delivery methods for our CCR delivery and do not plan to in the future
South (Region 3)	169900					We do not track consumer engagement or understanding on the CCR/ annual water quality report		Conduct consumer surveys or other methods evaluating consumer confidence in their water quality							We address questions or concerns we have received from consumers				Change language/wording where applicable	Change format of information (e.g. placement in the report, bulleted items vs. paragraph)	Change format of figures or pictures (e.g. placement in the report, report includes pictures and diagrams vs. includes only text)	Change the amount or type of information that is included in the CCR/annual water quality report						Information about the CCR is available on our utility’s website	Announcements to local media outlets like newspapers, radio, or television stations	Social media announcements	Other (please describe below)		Email elevator poster about the CCR to universities, large companies, etc.	Summary or explanation about information in the CCR	Contact information for the utility		Electronic copy of the CCR				We have not used any electronic delivery methods for our CCR delivery but plan to in the future
South (Region 3)	1598					We do not track consumer engagement or understanding on the CCR/ annual water quality report						We do not track consumer perceptions on their water quality or the effect of the CCR/ annual water quality report			We address questions or concerns we have received from consumers				Change language/wording where applicable									Information about the CCR is available on our utility’s website	Announcements to local media outlets like newspapers, radio, or television stations					Summary or explanation about information in the CCR	Contact information for the utility		Electronic copy of the CCR				We have not used any electronic delivery methods for our CCR delivery but plan to in the future
South (Region 3)	38000					We do not track consumer engagement or understanding on the CCR/ annual water quality report						We do not track consumer perceptions on their water quality or the effect of the CCR/ annual water quality report					We do not use any methods to understand what information consumers would like in their CCR/ annual water quality report								We do not test on the language, format, or other aspects of the CCR/ annual water quality report		Newsletters (electronic or hard copy) to consumers	Information about the CCR is available on our utility’s website						Summary or explanation about information in the CCR	Contact information for the utility		Electronic copy of the CCR				We have not used any electronic delivery methods for our CCR delivery but plan to in the future
South (Region 3)	700000					We do not track consumer engagement or understanding on the CCR/ annual water quality report					Other (please describe below)		We do not specifically conduct surveys regarding the CCR. A survey has been conducted regarding the overall performance and public perception of [Utility Name].				We do not use any methods to understand what information consumers would like in their CCR/ annual water quality report		Change language/wording where applicable					Other (please describe below)	We do not test on the language, format, or other aspects of the CCR/ annual water quality report	The CCR is published in both English and Spanish in all media where it is available.	Newsletters (electronic or hard copy) to consumers	Information about the CCR is available on our utility’s website	Announcements to local media outlets like newspapers, radio, or television stations	Social media announcements				Summary or explanation about information in the CCR	Contact information for the utility		Electronic copy of the CCR	Electronic copy of the CCR in a non-English language			We have not used any electronic delivery methods for our CCR delivery and do not plan to in the future
South (Region 3)	8550	Record the number of inquiries or comments received about the CCR/annual water quality report										We do not track consumer perceptions on their water quality or the effect of the CCR/ annual water quality report					We do not use any methods to understand what information consumers would like in their CCR/ annual water quality report								We do not test on the language, format, or other aspects of the CCR/ annual water quality report				Announcements to local media outlets like newspapers, radio, or television stations					Summary or explanation about information in the CCR	Contact information for the utility	Link(s) to EPA or CDC Consumer Confidence Report information					We have not used any electronic delivery methods for our CCR delivery and do not plan to in the future
West (Region 4)	600000	Record the number of inquiries or comments received about the CCR/annual water quality report	Record the content of inquiries or comments received about the CCR/annual water quality report	Conduct consumer surveys or other methods that evaluate whether consumers feel they understand the information in the CCR/ annual water quality report	Other (please describe below)		We are currently preparing a Customer Conversation that will focus on the CCR to gather data on how well our customers understand the information provided in the CCR and what we can do to improve this communication.	Conduct consumer surveys or other methods evaluating consumer confidence in their water quality			Other (please describe below)		We survey our customers every 2 years. Survey questions include focus on their understanding of and confidence in their water quality.		We address questions or concerns we have received from consumers	Other (please describe below)		The Customer Conversation will address this question.	Change language/wording where applicable	Change format of information (e.g. placement in the report, bulleted items vs. paragraph)	Change format of figures or pictures (e.g. placement in the report, report includes pictures and diagrams vs. includes only text)	Change the amount or type of information that is included in the CCR/annual water quality report		Other (please describe below)		A few years ago we completed an evaluation of the language used in our CCR and found it was at about a 12th grade reading level. We changed the language to bring it to a 7th grade reading level.	Newsletters (electronic or hard copy) to consumers	Information about the CCR is available on our utility’s website	Announcements to local media outlets like newspapers, radio, or television stations	Social media announcements				Summary or explanation about information in the CCR	Contact information for the utility	Link(s) to EPA or CDC Consumer Confidence Report information	Electronic copy of the CCR	Electronic copy of the CCR in a non-English language			We have not used any electronic delivery methods for our CCR delivery and do not plan to in the future
West (Region 4)	1220					We do not track consumer engagement or understanding on the CCR/ annual water quality report						We do not track consumer perceptions on their water quality or the effect of the CCR/ annual water quality report					We do not use any methods to understand what information consumers would like in their CCR/ annual water quality report		Change language/wording where applicable			Change the amount or type of information that is included in the CCR/annual water quality report										We do not conduct publicity outreach regarding our CCR/ annual water quality report			Contact information for the utility	Link(s) to EPA or CDC Consumer Confidence Report information	Electronic copy of the CCR				We have not used any electronic delivery methods for our CCR delivery and do not plan to in the future
West (Region 4)	1600				Other (please describe below)		We only track the information if there is a complaint about the CCR. Otherwise we do not track.				Other (please describe below)		Again, Only tracking complaints.				We do not use any methods to understand what information consumers would like in their CCR/ annual water quality report							Other (please describe below)	We do not test on the language, format, or other aspects of the CCR/ annual water quality report	We don't conduct testing, but we do make the report available in multiple languages.		Information about the CCR is available on our utility’s website			Other (please describe below)		Information posted in monthly invoice.		Contact information for the utility	Link(s) to EPA or CDC Consumer Confidence Report information	Electronic copy of the CCR	Electronic copy of the CCR in a non-English language			We have not used any electronic delivery methods for our CCR delivery and do not plan to in the future
West (Region 4)	2000					We do not track consumer engagement or understanding on the CCR/ annual water quality report						We do not track consumer perceptions on their water quality or the effect of the CCR/ annual water quality report					We do not use any methods to understand what information consumers would like in their CCR/ annual water quality report								We do not test on the language, format, or other aspects of the CCR/ annual water quality report			Information about the CCR is available on our utility’s website				We do not conduct publicity outreach regarding our CCR/ annual water quality report					Electronic copy of the CCR				We have not used any electronic delivery methods for our CCR delivery and do not plan to in the future
West (Region 4)	9700					We do not track consumer engagement or understanding on the CCR/ annual water quality report						We do not track consumer perceptions on their water quality or the effect of the CCR/ annual water quality report					We do not use any methods to understand what information consumers would like in their CCR/ annual water quality report								We do not test on the language, format, or other aspects of the CCR/ annual water quality report							We do not conduct publicity outreach regarding our CCR/ annual water quality report		Summary or explanation about information in the CCR	Contact information for the utility	Link(s) to EPA or CDC Consumer Confidence Report information	Electronic copy of the CCR	Electronic copy of the CCR in a non-English language			We have not used any electronic delivery methods for our CCR delivery and do not plan to in the future
West (Region 4)	13800					We do not track consumer engagement or understanding on the CCR/ annual water quality report						We do not track consumer perceptions on their water quality or the effect of the CCR/ annual water quality report					We do not use any methods to understand what information consumers would like in their CCR/ annual water quality report		Change language/wording where applicable	Change format of information (e.g. placement in the report, bulleted items vs. paragraph)	Change format of figures or pictures (e.g. placement in the report, report includes pictures and diagrams vs. includes only text)						Newsletters (electronic or hard copy) to consumers	Information about the CCR is available on our utility’s website	Announcements to local media outlets like newspapers, radio, or television stations	Social media announcements					Contact information for the utility		Electronic copy of the CCR				We have not used any electronic delivery methods for our CCR delivery and do not plan to in the future
West (Region 4)	20000	Record the number of inquiries or comments received about the CCR/annual water quality report										We do not track consumer perceptions on their water quality or the effect of the CCR/ annual water quality report					We do not use any methods to understand what information consumers would like in their CCR/ annual water quality report		Change language/wording where applicable		Change format of figures or pictures (e.g. placement in the report, report includes pictures and diagrams vs. includes only text)						Newsletters (electronic or hard copy) to consumers	Information about the CCR is available on our utility’s website						Summary or explanation about information in the CCR	Contact information for the utility		Electronic copy of the CCR				We have not used any electronic delivery methods for our CCR delivery but plan to in the future
West (Region 4)	50000					We do not track consumer engagement or understanding on the CCR/ annual water quality report						We do not track consumer perceptions on their water quality or the effect of the CCR/ annual water quality report					We do not use any methods to understand what information consumers would like in their CCR/ annual water quality report								We do not test on the language, format, or other aspects of the CCR/ annual water quality report							We do not conduct publicity outreach regarding our CCR/ annual water quality report		Summary or explanation about information in the CCR	Contact information for the utility	Link(s) to EPA or CDC Consumer Confidence Report information	Electronic copy of the CCR				We have not used any electronic delivery methods for our CCR delivery and do not plan to in the future
West (Region 4)	76000	Record the number of inquiries or comments received about the CCR/annual water quality report	Record the content of inquiries or comments received about the CCR/annual water quality report									We do not track consumer perceptions on their water quality or the effect of the CCR/ annual water quality report			We address questions or concerns we have received from consumers									Other (please describe below)		Follow [State Agency] CCR guidance requiring only the minimum translation Russian Spanish and Mandarin This report contains information about your drinking water		Information about the CCR is available on our utility’s website		Social media announcements	Other (please describe below)		Utility bill insert	Summary or explanation about information in the CCR	Contact information for the utility	Link(s) to EPA or CDC Consumer Confidence Report information	Electronic copy of the CCR				We had used electronic delivery for some or all of our consumer confidence reports/ water quality reports but have since stopped		No, and we do not plan to in the future			We have tracked the number of times the report has been accessed			We also track the number of customers requesting paper copies following instructions on the post card notification of CCR availability
West (Region 4)	190000					We do not track consumer engagement or understanding on the CCR/ annual water quality report						We do not track consumer perceptions on their water quality or the effect of the CCR/ annual water quality report					We do not use any methods to understand what information consumers would like in their CCR/ annual water quality report		Change language/wording where applicable								Newsletters (electronic or hard copy) to consumers			Social media announcements				Summary or explanation about information in the CCR		Link(s) to EPA or CDC Consumer Confidence Report information	Electronic copy of the CCR	Electronic copy of the CCR in a non-English language			We have not used any electronic delivery methods for our CCR delivery and do not plan to in the future
West (Region 4)	1500	Record the number of inquiries or comments received about the CCR/annual water quality report										We do not track consumer perceptions on their water quality or the effect of the CCR/ annual water quality report			We address questions or concerns we have received from consumers										We do not test on the language, format, or other aspects of the CCR/ annual water quality report		Newsletters (electronic or hard copy) to consumers	Information about the CCR is available on our utility’s website						Summary or explanation about information in the CCR			Electronic copy of the CCR				We have not used any electronic delivery methods for our CCR delivery and do not plan to in the future
West (Region 4)	1580					We do not track consumer engagement or understanding on the CCR/ annual water quality report						We do not track consumer perceptions on their water quality or the effect of the CCR/ annual water quality report					We do not use any methods to understand what information consumers would like in their CCR/ annual water quality report								We do not test on the language, format, or other aspects of the CCR/ annual water quality report							We do not conduct publicity outreach regarding our CCR/ annual water quality report			Contact information for the utility		Electronic copy of the CCR				We have not used any electronic delivery methods for our CCR delivery and do not plan to in the future
West (Region 4)	3500					We do not track consumer engagement or understanding on the CCR/ annual water quality report						We do not track consumer perceptions on their water quality or the effect of the CCR/ annual water quality report					We do not use any methods to understand what information consumers would like in their CCR/ annual water quality report								We do not test on the language, format, or other aspects of the CCR/ annual water quality report			Information about the CCR is available on our utility’s website	Announcements to local media outlets like newspapers, radio, or television stations	Social media announcements					Contact information for the utility		Electronic copy of the CCR				We have not used any electronic delivery methods for our CCR delivery and do not plan to in the future
West (Region 4)	42000					We do not track consumer engagement or understanding on the CCR/ annual water quality report					Other (please describe below)		We conducted our first comprehensive customer survey in 2016. We have not done a follow up to see how we have improved or implemented suggestions.				We do not use any methods to understand what information consumers would like in their CCR/ annual water quality report								We do not test on the language, format, or other aspects of the CCR/ annual water quality report			Information about the CCR is available on our utility’s website	Announcements to local media outlets like newspapers, radio, or television stations	Social media announcements					Contact information for the utility		Electronic copy of the CCR				We have not used any electronic delivery methods for our CCR delivery and do not plan to in the future
West (Region 4)	170000				Other (please describe below)		While we do not officially track, during the month that the report is mailed, we monitor incoming calls. For the current CCR, we have received 3-4 calls. We also develop FAQs to assist our communications and customer service reps when responding to inquiries from the public. As our water is from a very high quality ground source, we do not, in general, experience high call volumes regarding water…				Other (please describe below)		We will ask consumers about their perceptions of the water quality as part of a larger consumer satisfaction survey we do every 2 years.		We address questions or concerns we have received from consumers			As the report is directed by the EPA, we do not alter the format but we develop FAQs to respond to questions from the community and update our website and social media channels as needed to address community questions / concerns.							We do not test on the language, format, or other aspects of the CCR/ annual water quality report	As this is directed by the EPA, we do not alter what we provide to the community. We have FAQs, customer service reps and other ways of community additional information as needed.	Newsletters (electronic or hard copy) to consumers		Announcements to local media outlets like newspapers, radio, or television stations					Summary or explanation about information in the CCR	Contact information for the utility		Electronic copy of the CCR			We have a section on our website that explains the CCR and allows anyone to pull up the CCR for their specific address.	We have not used any electronic delivery methods for our CCR delivery and do not plan to in the future
West (Region 4)	175					We do not track consumer engagement or understanding on the CCR/ annual water quality report						We do not track consumer perceptions on their water quality or the effect of the CCR/ annual water quality report			We address questions or concerns we have received from consumers										We do not test on the language, format, or other aspects of the CCR/ annual water quality report							We do not conduct publicity outreach regarding our CCR/ annual water quality report								don't have website	We have not used any electronic delivery methods for our CCR delivery and do not plan to in the future
West (Region 4)	21000					We do not track consumer engagement or understanding on the CCR/ annual water quality report						We do not track consumer perceptions on their water quality or the effect of the CCR/ annual water quality report					We do not use any methods to understand what information consumers would like in their CCR/ annual water quality report		Change language/wording where applicable									Information about the CCR is available on our utility’s website			Other (please describe below)		Notification in our customer's billing statement.				Electronic copy of the CCR				We have not used any electronic delivery methods for our CCR delivery and do not plan to in the future
West (Region 4)	380000			Conduct consumer surveys or other methods that evaluate whether consumers feel they understand the information in the CCR/ annual water quality report						Conduct consumer surveys or other methods that evaluate the effect of the CCR/ annual water quality report on consumer confidence				We conduct methods, such as surveys or polls, that directly ask consumers what information they would like in their CCR/ annual water quality report					Change language/wording where applicable								Newsletters (electronic or hard copy) to consumers	Information about the CCR is available on our utility’s website	Announcements to local media outlets like newspapers, radio, or television stations	Social media announcements				Summary or explanation about information in the CCR	Contact information for the utility		Electronic copy of the CCR	Electronic copy of the CCR in a non-English language			We had used electronic delivery for some or all of our consumer confidence reports/ water quality reports but have since stopped		No, and we do not plan to in the future		We have conducted consumer surveys
West (Region 4)	250000	Record the number of inquiries or comments received about the CCR/annual water quality report										We do not track consumer perceptions on their water quality or the effect of the CCR/ annual water quality report			We address questions or concerns we have received from consumers				Change language/wording where applicable	Change format of information (e.g. placement in the report, bulleted items vs. paragraph)	Change format of figures or pictures (e.g. placement in the report, report includes pictures and diagrams vs. includes only text)	Change the amount or type of information that is included in the CCR/annual water quality report					Newsletters (electronic or hard copy) to consumers	Information about the CCR is available on our utility’s website		Social media announcements					Contact information for the utility		Electronic copy of the CCR	Electronic copy of the CCR in a non-English language			Yes, we have used electronic delivery for some or all of our consumer confidence reports/ water quality reports			Included more info graphics and colorful graphics. Used more color and enhanced formatting. Included more water conservation, water service enhancement, awards and tips about drinking water (water hardness, taste and odor, cloudy water, chlorine taste and odor, etc.) Also added information on protecting the environment (disposal of unused medications, draining/backwashing pool or spa, etc.).		We have tracked the number of times the report has been accessed
West (Region 4)	1600000	Record the number of inquiries or comments received about the CCR/annual water quality report	Record the content of inquiries or comments received about the CCR/annual water quality report									We do not track consumer perceptions on their water quality or the effect of the CCR/ annual water quality report			We address questions or concerns we have received from consumers				Change language/wording where applicable	Change format of information (e.g. placement in the report, bulleted items vs. paragraph)	Change format of figures or pictures (e.g. placement in the report, report includes pictures and diagrams vs. includes only text)	Change the amount or type of information that is included in the CCR/annual water quality report					Newsletters (electronic or hard copy) to consumers	Information about the CCR is available on our utility’s website						Summary or explanation about information in the CCR	Contact information for the utility		Electronic copy of the CCR	Electronic copy of the CCR in a non-English language	Other (please describe below)	FAQs on water quality issues of interest to our customers	Yes, we have used electronic delivery for some or all of our consumer confidence reports/ water quality reports		No, and we do not plan to in the future					We have not tracked or conducted testing on whether electronic delivery has changed consumer feedback, understanding, or perceptions about water quality information in the eCCR
West (Region 4)	85000	Record the number of inquiries or comments received about the CCR/annual water quality report	Record the content of inquiries or comments received about the CCR/annual water quality report	Conduct consumer surveys or other methods that evaluate whether consumers feel they understand the information in the CCR/ annual water quality report	Other (please describe below)		We track # of hits on the CCR webpage as well.	Conduct consumer surveys or other methods evaluating consumer confidence in their water quality		Conduct consumer surveys or other methods that evaluate the effect of the CCR/ annual water quality report on consumer confidence					We address questions or concerns we have received from consumers	Other (please describe below)		We track what is occurring around the country and what the public may have heard about in the media (e.g. chromium 6, lead issues, algal/cyanotoxin, etc.	Change language/wording where applicable	Change format of information (e.g. placement in the report, bulleted items vs. paragraph)	Change format of figures or pictures (e.g. placement in the report, report includes pictures and diagrams vs. includes only text)	Change the amount or type of information that is included in the CCR/annual water quality report				We are always seeking to make information easier to understand, with simpler text, pictures, and other visual aids (graphs, diagrams, etc.)	Newsletters (electronic or hard copy) to consumers	Information about the CCR is available on our utility’s website	Announcements to local media outlets like newspapers, radio, or television stations	Social media announcements			We don't always issue a release to the media; it depends on if we feel that they will pick it up because of a hot topic (e.g. lead).	Summary or explanation about information in the CCR	Contact information for the utility	Link(s) to EPA or CDC Consumer Confidence Report information	Electronic copy of the CCR	Electronic copy of the CCR in a non-English language		Links to the EPA site are linked within the electronic copy of the CCR.	We have not used any electronic delivery methods for our CCR delivery and do not plan to in the future
West (Region 4)	587					We do not track consumer engagement or understanding on the CCR/ annual water quality report					Other (please describe below)		We record all customer contacts in our system and prepare a report for each inquiry.		We address questions or concerns we have received from consumers									Other (please describe below)		We honor all requests for the report to be sent in a different language.	Newsletters (electronic or hard copy) to consumers	Information about the CCR is available on our utility’s website			Other (please describe below)		messages on the billing statement				Electronic copy of the CCR				Yes, we have used electronic delivery for some or all of our consumer confidence reports/ water quality reports			Our report is reviewed by our[State Regulator] and we make changes and additions based on his recommendation.		We have tracked the number of times the report has been accessed
West (Region 4)	1396	Record the number of inquiries or comments received about the CCR/annual water quality report	Record the content of inquiries or comments received about the CCR/annual water quality report									We do not track consumer perceptions on their water quality or the effect of the CCR/ annual water quality report			We address questions or concerns we have received from consumers										We do not test on the language, format, or other aspects of the CCR/ annual water quality report		Newsletters (electronic or hard copy) to consumers	Information about the CCR is available on our utility’s website						Summary or explanation about information in the CCR	Contact information for the utility	Link(s) to EPA or CDC Consumer Confidence Report information	Electronic copy of the CCR				Yes, we have used electronic delivery for some or all of our consumer confidence reports/ water quality reports		No, and we do not plan to in the future					We have not tracked or conducted testing on whether electronic delivery has changed consumer feedback, understanding, or perceptions about water quality information in the eCCR
West (Region 4)	3300				Other (please describe below)		Any call or comment concerning our CCR is immediatly reviewed and explained to our customers.					We do not track consumer perceptions on their water quality or the effect of the CCR/ annual water quality report			We address questions or concerns we have received from consumers										We do not test on the language, format, or other aspects of the CCR/ annual water quality report			Information about the CCR is available on our utility’s website									Electronic copy of the CCR				Yes, we have used electronic delivery for some or all of our consumer confidence reports/ water quality reports		No, and we do not plan to in the future					We have not tracked or conducted testing on whether electronic delivery has changed consumer feedback, understanding, or perceptions about water quality information in the eCCR
West (Region 4)	3900					We do not track consumer engagement or understanding on the CCR/ annual water quality report						We do not track consumer perceptions on their water quality or the effect of the CCR/ annual water quality report					We do not use any methods to understand what information consumers would like in their CCR/ annual water quality report	Any questions that arise from customers through out the year and are relevant would be integrated into the annual water quality report.	Change language/wording where applicable	Change format of information (e.g. placement in the report, bulleted items vs. paragraph)	Change format of figures or pictures (e.g. placement in the report, report includes pictures and diagrams vs. includes only text)	Change the amount or type of information that is included in the CCR/annual water quality report					Newsletters (electronic or hard copy) to consumers	Information about the CCR is available on our utility’s website	Announcements to local media outlets like newspapers, radio, or television stations	Social media announcements					Contact information for the utility		Electronic copy of the CCR				Yes, we have used electronic delivery for some or all of our consumer confidence reports/ water quality reports		No, and we do not plan to in the future					We have not tracked or conducted testing on whether electronic delivery has changed consumer feedback, understanding, or perceptions about water quality information in the eCCR
West (Region 4)	4000					We do not track consumer engagement or understanding on the CCR/ annual water quality report						We do not track consumer perceptions on their water quality or the effect of the CCR/ annual water quality report			We address questions or concerns we have received from consumers				Change language/wording where applicable	Change format of information (e.g. placement in the report, bulleted items vs. paragraph)		Change the amount or type of information that is included in the CCR/annual water quality report					Newsletters (electronic or hard copy) to consumers	Information about the CCR is available on our utility’s website	Announcements to local media outlets like newspapers, radio, or television stations	Social media announcements	Other (please describe below)		In the bill insert	Summary or explanation about information in the CCR	Contact information for the utility		Electronic copy of the CCR				Yes, we have used electronic delivery for some or all of our consumer confidence reports/ water quality reports	Not this year, but we plan to in the future						We have not tracked or conducted testing on whether electronic delivery has changed consumer feedback, understanding, or perceptions about water quality information in the eCCR
West (Region 4)	10500					We do not track consumer engagement or understanding on the CCR/ annual water quality report					Other (please describe below)		log inquires				We do not use any methods to understand what information consumers would like in their CCR/ annual water quality report								We do not test on the language, format, or other aspects of the CCR/ annual water quality report		Newsletters (electronic or hard copy) to consumers	Information about the CCR is available on our utility’s website		Social media announcements				Summary or explanation about information in the CCR	Contact information for the utility		Electronic copy of the CCR				Yes, we have used electronic delivery for some or all of our consumer confidence reports/ water quality reports		No, and we do not plan to in the future					We have not tracked or conducted testing on whether electronic delivery has changed consumer feedback, understanding, or perceptions about water quality information in the eCCR
West (Region 4)	14000	Record the number of inquiries or comments received about the CCR/annual water quality report	Record the content of inquiries or comments received about the CCR/annual water quality report						Conduct consumer surveys or other methods evaluating specific consumer concerns about their water quality						We address questions or concerns we have received from consumers				Change language/wording where applicable									Information about the CCR is available on our utility’s website									Electronic copy of the CCR				Yes, we have used electronic delivery for some or all of our consumer confidence reports/ water quality reports		No, and we do not plan to in the future			We have tracked the number of times the report has been accessed
West (Region 4)	30711					We do not track consumer engagement or understanding on the CCR/ annual water quality report						We do not track consumer perceptions on their water quality or the effect of the CCR/ annual water quality report					We do not use any methods to understand what information consumers would like in their CCR/ annual water quality report		Change language/wording where applicable													We do not conduct publicity outreach regarding our CCR/ annual water quality report			Contact information for the utility		Electronic copy of the CCR	Electronic copy of the CCR in a non-English language			Yes, we have used electronic delivery for some or all of our consumer confidence reports/ water quality reports		No, and we do not plan to in the future					We have not tracked or conducted testing on whether electronic delivery has changed consumer feedback, understanding, or perceptions about water quality information in the eCCR
West (Region 4)	37000	Record the number of inquiries or comments received about the CCR/annual water quality report	Record the content of inquiries or comments received about the CCR/annual water quality report		Other (please describe below)		input at public outreach				Other (please describe below)		input at public outreach		We address questions or concerns we have received from consumers				Change language/wording where applicable		Change format of figures or pictures (e.g. placement in the report, report includes pictures and diagrams vs. includes only text)						Newsletters (electronic or hard copy) to consumers	Information about the CCR is available on our utility’s website			Other (please describe below)		public outreach events, in public places such as the library, city hall, mail billing insert announcment		Contact information for the utility		Electronic copy of the CCR				Yes, we have used electronic delivery for some or all of our consumer confidence reports/ water quality reports		No, and we do not plan to in the future					We have not tracked or conducted testing on whether electronic delivery has changed consumer feedback, understanding, or perceptions about water quality information in the eCCR
West (Region 4)	40434	Record the number of inquiries or comments received about the CCR/annual water quality report			Other (please describe below)		Most of the inquiries received are from customers requesting paper copies of the CCR, as we now (since 2014) utilize electronic delivery methods. Water quality questions are forwarded to the appropriate personnel.	Conduct consumer surveys or other methods evaluating consumer confidence in their water quality	Conduct consumer surveys or other methods evaluating specific consumer concerns about their water quality				The consumer surveys were not directly related to the delivery of the CCR. We are evaluating a new water supply project, and the surveys were undertaken to gauge customers' receptiveness to a new water source.		We address questions or concerns we have received from consumers				Change language/wording where applicable	Change format of information (e.g. placement in the report, bulleted items vs. paragraph)	Change format of figures or pictures (e.g. placement in the report, report includes pictures and diagrams vs. includes only text)	Change the amount or type of information that is included in the CCR/annual water quality report					Newsletters (electronic or hard copy) to consumers	Information about the CCR is available on our utility’s website	Announcements to local media outlets like newspapers, radio, or television stations	Social media announcements	Other (please describe below)		We take paper copies of the CCR to outreach events for distribution to attendees.	Summary or explanation about information in the CCR	Contact information for the utility	Link(s) to EPA or CDC Consumer Confidence Report information	Electronic copy of the CCR		Other (please describe below)	The links to the EPA and CDC are embedded within the electronic copy of the CCR on our website.	Yes, we have used electronic delivery for some or all of our consumer confidence reports/ water quality reports			The report was expanded from 4 pages to 8 pages, which enabled us to have more room for the water quality table and maps/diagrams. We were also able to enlarge the print size and not have to squish the text to make it fit on less pages.			Other (please describe below)		We have email software that we use to track how many emails were deleted or opened. We also track the bounce-back email addresses to cross-reference the customer and send them a paper copy of the CCR.
West (Region 4)	42686					We do not track consumer engagement or understanding on the CCR/ annual water quality report						We do not track consumer perceptions on their water quality or the effect of the CCR/ annual water quality report			We address questions or concerns we have received from consumers				Change language/wording where applicable	Change format of information (e.g. placement in the report, bulleted items vs. paragraph)	Change format of figures or pictures (e.g. placement in the report, report includes pictures and diagrams vs. includes only text)	Change the amount or type of information that is included in the CCR/annual water quality report					Newsletters (electronic or hard copy) to consumers	Information about the CCR is available on our utility’s website		Social media announcements				Summary or explanation about information in the CCR	Contact information for the utility	Link(s) to EPA or CDC Consumer Confidence Report information	Electronic copy of the CCR	Electronic copy of the CCR in a non-English language			Yes, we have used electronic delivery for some or all of our consumer confidence reports/ water quality reports							We have not tracked or conducted testing on whether electronic delivery has changed consumer feedback, understanding, or perceptions about water quality information in the eCCR
West (Region 4)	57000					We do not track consumer engagement or understanding on the CCR/ annual water quality report		Conduct consumer surveys or other methods evaluating consumer confidence in their water quality							We address questions or concerns we have received from consumers										We do not test on the language, format, or other aspects of the CCR/ annual water quality report		Newsletters (electronic or hard copy) to consumers	Information about the CCR is available on our utility’s website	Announcements to local media outlets like newspapers, radio, or television stations	Social media announcements	Other (please describe below)		Press release, bill message, bill insert, eblast to our subscribers, place info in community centers & in our brochure racks, provide info at community events	Summary or explanation about information in the CCR	Contact information for the utility	Link(s) to EPA or CDC Consumer Confidence Report information	Electronic copy of the CCR				Yes, we have used electronic delivery for some or all of our consumer confidence reports/ water quality reports		No, and we do not plan to in the future			We have tracked the number of times the report has been accessed
West (Region 4)	74000					We do not track consumer engagement or understanding on the CCR/ annual water quality report						We do not track consumer perceptions on their water quality or the effect of the CCR/ annual water quality report					We do not use any methods to understand what information consumers would like in their CCR/ annual water quality report								We do not test on the language, format, or other aspects of the CCR/ annual water quality report			Information about the CCR is available on our utility’s website									Electronic copy of the CCR				Yes, we have used electronic delivery for some or all of our consumer confidence reports/ water quality reports		No, and we do not plan to in the future					We have not tracked or conducted testing on whether electronic delivery has changed consumer feedback, understanding, or perceptions about water quality information in the eCCR
West (Region 4)	80000	Record the number of inquiries or comments received about the CCR/annual water quality report										We do not track consumer perceptions on their water quality or the effect of the CCR/ annual water quality report			We address questions or concerns we have received from consumers										We do not test on the language, format, or other aspects of the CCR/ annual water quality report		Newsletters (electronic or hard copy) to consumers	Information about the CCR is available on our utility’s website		Social media announcements							Electronic copy of the CCR				Yes, we have used electronic delivery for some or all of our consumer confidence reports/ water quality reports		No, and we do not plan to in the future					We have not tracked or conducted testing on whether electronic delivery has changed consumer feedback, understanding, or perceptions about water quality information in the eCCR
West (Region 4)	265000	Record the number of inquiries or comments received about the CCR/annual water quality report	Record the content of inquiries or comments received about the CCR/annual water quality report					Conduct consumer surveys or other methods evaluating consumer confidence in their water quality							We address questions or concerns we have received from consumers										We do not test on the language, format, or other aspects of the CCR/ annual water quality report	We updated our format to make it more user friendly including use of bulleted items, tables and graphs along with more white space and pictures but did not survey our customer to gt input. We used in-house staff to review and provide input.	Newsletters (electronic or hard copy) to consumers	Information about the CCR is available on our utility’s website	Announcements to local media outlets like newspapers, radio, or television stations	Social media announcements					Contact information for the utility		Electronic copy of the CCR	Electronic copy of the CCR in a non-English language			Yes, we have used electronic delivery for some or all of our consumer confidence reports/ water quality reports			We made the report longer and more visually appealing, we use color print, more photos and white space, and increased the size of the report from pre-electronic delivery.				We have not tracked or conducted testing on whether electronic delivery has changed consumer feedback, understanding, or perceptions about water quality information in the eCCR
West (Region 4)	1000001					We do not track consumer engagement or understanding on the CCR/ annual water quality report		Conduct consumer surveys or other methods evaluating consumer confidence in their water quality							We address questions or concerns we have received from consumers										We do not test on the language, format, or other aspects of the CCR/ annual water quality report			Information about the CCR is available on our utility’s website		Social media announcements	Other (please describe below)		in each customer's water bill.	Summary or explanation about information in the CCR	Contact information for the utility	Link(s) to EPA or CDC Consumer Confidence Report information	Electronic copy of the CCR				Yes, we have used electronic delivery for some or all of our consumer confidence reports/ water quality reports			previously we tried to fit the paper version of the CCR with the bill. this limited the size of the CCR. Since utilizing an electronic version as well as mailing paper copies only when requested, we have been able to expand the format to a larger size to fit more information in a more graphically pleasing format				We have not tracked or conducted testing on whether electronic delivery has changed consumer feedback, understanding, or perceptions about water quality information in the eCCR	due to the requirement of being directly accessible from the short form url, we cannot track electronic access to the CCR
West (Region 4)	1400000	Record the number of inquiries or comments received about the CCR/annual water quality report	Record the content of inquiries or comments received about the CCR/annual water quality report		Other (please describe below)		Customer's inquiry are through a dedicated phone line answering system and email system. The name, address, and nature of requests are recorded and we respond to all inquires. We also monitor the customer responses through facebook and twitter.				Other (please describe below)		Customer's inquiry are through a dedicated phone line answering system and email system. The name, address, and nature of requests are recorded and we respond to all inquires. We also monitor the customer responses through facebook and twitter. we also use other social media such as Nextdoor.		We address questions or concerns we have received from consumers										We do not test on the language, format, or other aspects of the CCR/ annual water quality report		Newsletters (electronic or hard copy) to consumers	Information about the CCR is available on our utility’s website		Social media announcements			outreach also includes [Utility] publication.	Summary or explanation about information in the CCR	Contact information for the utility	Link(s) to EPA or CDC Consumer Confidence Report information	Electronic copy of the CCR	Electronic copy of the CCR in a non-English language			Yes, we have used electronic delivery for some or all of our consumer confidence reports/ water quality reports		No, and we do not plan to in the future				Other (please describe below)		Customer's inquiry are through a dedicated phone line answering system and email system. The name, address, and nature of requests are recorded and we respond to all inquires. We also monitor the customer responses through facebook and twitter.
West (Region 4)	2000					We do not track consumer engagement or understanding on the CCR/ annual water quality report						We do not track consumer perceptions on their water quality or the effect of the CCR/ annual water quality report					We do not use any methods to understand what information consumers would like in their CCR/ annual water quality report								We do not test on the language, format, or other aspects of the CCR/ annual water quality report			Information about the CCR is available on our utility’s website								Link(s) to EPA or CDC Consumer Confidence Report information	Electronic copy of the CCR				Yes, we have used electronic delivery for some or all of our consumer confidence reports/ water quality reports		No, and we do not plan to in the future					We have not tracked or conducted testing on whether electronic delivery has changed consumer feedback, understanding, or perceptions about water quality information in the eCCR
West (Region 4)	2500					We do not track consumer engagement or understanding on the CCR/ annual water quality report						We do not track consumer perceptions on their water quality or the effect of the CCR/ annual water quality report					We do not use any methods to understand what information consumers would like in their CCR/ annual water quality report								We do not test on the language, format, or other aspects of the CCR/ annual water quality report							We do not conduct publicity outreach regarding our CCR/ annual water quality report		Summary or explanation about information in the CCR	Contact information for the utility	Link(s) to EPA or CDC Consumer Confidence Report information	Electronic copy of the CCR				Yes, we have used electronic delivery for some or all of our consumer confidence reports/ water quality reports		No, and we do not plan to in the future					We have not tracked or conducted testing on whether electronic delivery has changed consumer feedback, understanding, or perceptions about water quality information in the eCCR
West (Region 4)	7500					We do not track consumer engagement or understanding on the CCR/ annual water quality report						We do not track consumer perceptions on their water quality or the effect of the CCR/ annual water quality report			We address questions or concerns we have received from consumers							Change the amount or type of information that is included in the CCR/annual water quality report					Newsletters (electronic or hard copy) to consumers	Information about the CCR is available on our utility’s website	Announcements to local media outlets like newspapers, radio, or television stations					Summary or explanation about information in the CCR			Electronic copy of the CCR				Yes, we have used electronic delivery for some or all of our consumer confidence reports/ water quality reports		No, and we do not plan to in the future					We have not tracked or conducted testing on whether electronic delivery has changed consumer feedback, understanding, or perceptions about water quality information in the eCCR
West (Region 4)	19000					We do not track consumer engagement or understanding on the CCR/ annual water quality report						We do not track consumer perceptions on their water quality or the effect of the CCR/ annual water quality report					We do not use any methods to understand what information consumers would like in their CCR/ annual water quality report								We do not test on the language, format, or other aspects of the CCR/ annual water quality report			Information about the CCR is available on our utility’s website						Summary or explanation about information in the CCR	Contact information for the utility	Link(s) to EPA or CDC Consumer Confidence Report information	Electronic copy of the CCR				Yes, we have used electronic delivery for some or all of our consumer confidence reports/ water quality reports	Not this year, but we plan to in the future						We have not tracked or conducted testing on whether electronic delivery has changed consumer feedback, understanding, or perceptions about water quality information in the eCCR
West (Region 4)	20000					We do not track consumer engagement or understanding on the CCR/ annual water quality report						We do not track consumer perceptions on their water quality or the effect of the CCR/ annual water quality report					We do not use any methods to understand what information consumers would like in their CCR/ annual water quality report								We do not test on the language, format, or other aspects of the CCR/ annual water quality report							We do not conduct publicity outreach regarding our CCR/ annual water quality report		Summary or explanation about information in the CCR	Contact information for the utility	Link(s) to EPA or CDC Consumer Confidence Report information	Electronic copy of the CCR				Yes, we have used electronic delivery for some or all of our consumer confidence reports/ water quality reports			more general information about the water source and treatment process				We have not tracked or conducted testing on whether electronic delivery has changed consumer feedback, understanding, or perceptions about water quality information in the eCCR
West (Region 4)	26000	Record the number of inquiries or comments received about the CCR/annual water quality report							Conduct consumer surveys or other methods evaluating specific consumer concerns about their water quality								We do not use any methods to understand what information consumers would like in their CCR/ annual water quality report		Change language/wording where applicable								Newsletters (electronic or hard copy) to consumers	Information about the CCR is available on our utility’s website		Social media announcements				Summary or explanation about information in the CCR	Contact information for the utility	Link(s) to EPA or CDC Consumer Confidence Report information	Electronic copy of the CCR	Electronic copy of the CCR in a non-English language			Yes, we have used electronic delivery for some or all of our consumer confidence reports/ water quality reports	Not this year, but we plan to in the future				We have tracked the number of times the report has been accessed
West (Region 4)	55000					We do not track consumer engagement or understanding on the CCR/ annual water quality report						We do not track consumer perceptions on their water quality or the effect of the CCR/ annual water quality report					We do not use any methods to understand what information consumers would like in their CCR/ annual water quality report								We do not test on the language, format, or other aspects of the CCR/ annual water quality report			Information about the CCR is available on our utility’s website		Social media announcements							Electronic copy of the CCR				Yes, we have used electronic delivery for some or all of our consumer confidence reports/ water quality reports		No, and we do not plan to in the future					We have not tracked or conducted testing on whether electronic delivery has changed consumer feedback, understanding, or perceptions about water quality information in the eCCR
West (Region 4)	80000					We do not track consumer engagement or understanding on the CCR/ annual water quality report						We do not track consumer perceptions on their water quality or the effect of the CCR/ annual water quality report			We address questions or concerns we have received from consumers										We do not test on the language, format, or other aspects of the CCR/ annual water quality report		Newsletters (electronic or hard copy) to consumers	Information about the CCR is available on our utility’s website	Announcements to local media outlets like newspapers, radio, or television stations	Social media announcements				Summary or explanation about information in the CCR	Contact information for the utility	Link(s) to EPA or CDC Consumer Confidence Report information	Electronic copy of the CCR				Yes, we have used electronic delivery for some or all of our consumer confidence reports/ water quality reports	Not this year, but we plan to in the future				We have tracked the number of times the report has been accessed
West (Region 4)	124000	Record the number of inquiries or comments received about the CCR/annual water quality report	Record the content of inquiries or comments received about the CCR/annual water quality report					Conduct consumer surveys or other methods evaluating consumer confidence in their water quality	Conduct consumer surveys or other methods evaluating specific consumer concerns about their water quality				We occasionally survey customer satisfaction with the quality of our drinking water, but we do not specifically ask about the consumer confidence report. We do track customer questions and comments about, and problems with, our water quality.		We address questions or concerns we have received from consumers	Other (please describe below)		We also periodically ask other city staffers what they would like to see in the report.	Change language/wording where applicable							We have made changes to the language used in the report based on customer input, but the input was not specifically solicited by us.	Newsletters (electronic or hard copy) to consumers	Information about the CCR is available on our utility’s website	Announcements to local media outlets like newspapers, radio, or television stations	Social media announcements	Other (please describe below)		The report is also "announced" on the monthly bills.	Summary or explanation about information in the CCR	Contact information for the utility	Link(s) to EPA or CDC Consumer Confidence Report information	Electronic copy of the CCR		Other (please describe below)	The availability of the report in a non-English language is included in the report and on the website.	Yes, we have used electronic delivery for some or all of our consumer confidence reports/ water quality reports			Yes, we are including more information on the watershed than previous years when space and weight were limited.			Other (please describe below)		We continue to track the number of questions we receive about the CCR.
West (Region 4)	1150					We do not track consumer engagement or understanding on the CCR/ annual water quality report						We do not track consumer perceptions on their water quality or the effect of the CCR/ annual water quality report			We address questions or concerns we have received from consumers				Change language/wording where applicable	Change format of information (e.g. placement in the report, bulleted items vs. paragraph)	Change format of figures or pictures (e.g. placement in the report, report includes pictures and diagrams vs. includes only text)							Information about the CCR is available on our utility’s website	Announcements to local media outlets like newspapers, radio, or television stations						Contact information for the utility		Electronic copy of the CCR				We have not used any electronic delivery methods for our CCR delivery but plan to in the future
West (Region 4)	129000					We do not track consumer engagement or understanding on the CCR/ annual water quality report						We do not track consumer perceptions on their water quality or the effect of the CCR/ annual water quality report					We do not use any methods to understand what information consumers would like in their CCR/ annual water quality report	most of what is reported is mandatory not up to the customer		Change format of information (e.g. placement in the report, bulleted items vs. paragraph)	Change format of figures or pictures (e.g. placement in the report, report includes pictures and diagrams vs. includes only text)	Change the amount or type of information that is included in the CCR/annual water quality report					Newsletters (electronic or hard copy) to consumers	Information about the CCR is available on our utility’s website			Other (please describe below)		Delivery to each water billing account address, delivery to police stations, City Hall, libraries.	Summary or explanation about information in the CCR	Contact information for the utility		Electronic copy of the CCR			we provide website addresses in the CCR for the EPA sites	Yes, we have used electronic delivery for some or all of our consumer confidence reports/ water quality reports		No, and we do not plan to in the future				Other (please describe below)		We provide information electronically to customers upon request. We deliver our reports to our customers by had delivery or the US postal service.
West (Region 4)	460000					We do not track consumer engagement or understanding on the CCR/ annual water quality report		Conduct consumer surveys or other methods evaluating consumer confidence in their water quality	Conduct consumer surveys or other methods evaluating specific consumer concerns about their water quality								We do not use any methods to understand what information consumers would like in their CCR/ annual water quality report								We do not test on the language, format, or other aspects of the CCR/ annual water quality report		Newsletters (electronic or hard copy) to consumers	Information about the CCR is available on our utility’s website		Social media announcements	Other (please describe below)		We share the annual water quality report with our employees through our weekly internal newsletter and on our Intranet.	Summary or explanation about information in the CCR	Contact information for the utility		Electronic copy of the CCR				Yes, we have used electronic delivery for some or all of our consumer confidence reports/ water quality reports		No, and we do not plan to in the future					We have not tracked or conducted testing on whether electronic delivery has changed consumer feedback, understanding, or perceptions about water quality information in the eCCR
West (Region 4)	1400000					We do not track consumer engagement or understanding on the CCR/ annual water quality report						We do not track consumer perceptions on their water quality or the effect of the CCR/ annual water quality report			We address questions or concerns we have received from consumers										We do not test on the language, format, or other aspects of the CCR/ annual water quality report							We do not conduct publicity outreach regarding our CCR/ annual water quality report		Summary or explanation about information in the CCR	Contact information for the utility	Link(s) to EPA or CDC Consumer Confidence Report information	Electronic copy of the CCR	Electronic copy of the CCR in a non-English language			Yes, we have used electronic delivery for some or all of our consumer confidence reports/ water quality reports			Included analytes that are not required, but popular in customer inquiries.				We have not tracked or conducted testing on whether electronic delivery has changed consumer feedback, understanding, or perceptions about water quality information in the eCCR
West (Region 4)	12000	Record the number of inquiries or comments received about the CCR/annual water quality report	Record the content of inquiries or comments received about the CCR/annual water quality report		Other (please describe below)		return receipts for all CCR emailed to customers.					We do not track consumer perceptions on their water quality or the effect of the CCR/ annual water quality report					We do not use any methods to understand what information consumers would like in their CCR/ annual water quality report	our reports prepared by uility laboratory manager (me!) Don't have enough time to prepare representative survey of customers.	Change language/wording where applicable									Information about the CCR is available on our utility’s website	Announcements to local media outlets like newspapers, radio, or television stations	Social media announcements	Other (please describe below)		notices on utility bills "Water Reports Coming Soon" for 2 months prior to issuance and "Reports Now Available" for 2 months after issuance.		Contact information for the utility	Link(s) to EPA or CDC Consumer Confidence Report information	Electronic copy of the CCR				Yes, we have used electronic delivery for some or all of our consumer confidence reports/ water quality reports			Since 2013, we have issued report electronically. We operate 3 PWS, one on each [location]. We had one report for all PWS, with the table having a separate column for each [location]. This year, we issued a report specific for each [location].				We have not tracked or conducted testing on whether electronic delivery has changed consumer feedback, understanding, or perceptions about water quality information in the eCCR
West (Region 4)	42871					We do not track consumer engagement or understanding on the CCR/ annual water quality report						We do not track consumer perceptions on their water quality or the effect of the CCR/ annual water quality report			We address questions or concerns we have received from consumers				Change language/wording where applicable	Change format of information (e.g. placement in the report, bulleted items vs. paragraph)	Change format of figures or pictures (e.g. placement in the report, report includes pictures and diagrams vs. includes only text)	Change the amount or type of information that is included in the CCR/annual water quality report						Information about the CCR is available on our utility’s website									Electronic copy of the CCR				Yes, we have used electronic delivery for some or all of our consumer confidence reports/ water quality reports			We currently have [many] water systems for which we produce annual CCRs. In the past, before the availability of the option to deliver electronically, we delivered the reports using bulk mail to reduce costs. To streamline the production process and because bulk mail requires that the mailout be uniform in weight, efforts were made to make the reports from all water systems fit on the same size p…			Other (please describe below)		The electronic delivery method requires the utility to provide the customer access to other forms of delivery of the CCR. We have received phone calls, email, and letters from our customers. Their feedback has been considered when producing the CCRs.
West (Region 4)	9920					We do not track consumer engagement or understanding on the CCR/ annual water quality report						We do not track consumer perceptions on their water quality or the effect of the CCR/ annual water quality report						We provide additional current information about our utilities activities.							We do not test on the language, format, or other aspects of the CCR/ annual water quality report			Information about the CCR is available on our utility’s website									Electronic copy of the CCR				Yes, we have used electronic delivery for some or all of our consumer confidence reports/ water quality reports			Yes we have included additional information about the utilities activities.				We have not tracked or conducted testing on whether electronic delivery has changed consumer feedback, understanding, or perceptions about water quality information in the eCCR
West (Region 4)	10500	Record the number of inquiries or comments received about the CCR/annual water quality report	Record the content of inquiries or comments received about the CCR/annual water quality report								Other (please describe below)		We actually do not get any comments from our customers about the CCR other than our Board members.				We do not use any methods to understand what information consumers would like in their CCR/ annual water quality report								We do not test on the language, format, or other aspects of the CCR/ annual water quality report			Information about the CCR is available on our utility’s website			Other (please describe below)		We mail a postcard announcement to all residents within our District whether they pay a bill or not. We have paper copies of the CCR available, but generally less than 10 people ask for a hard copy. Less than 40 hit our website for the electronic copy (pdf).	Summary or explanation about information in the CCR	Contact information for the utility	Link(s) to EPA or CDC Consumer Confidence Report information	Electronic copy of the CCR				Yes, we have used electronic delivery for some or all of our consumer confidence reports/ water quality reports		No, and we do not plan to in the future					We have not tracked or conducted testing on whether electronic delivery has changed consumer feedback, understanding, or perceptions about water quality information in the eCCR
West (Region 4)	13500	Record the number of inquiries or comments received about the CCR/annual water quality report										We do not track consumer perceptions on their water quality or the effect of the CCR/ annual water quality report			We address questions or concerns we have received from consumers				Change language/wording where applicable	Change format of information (e.g. placement in the report, bulleted items vs. paragraph)	Change format of figures or pictures (e.g. placement in the report, report includes pictures and diagrams vs. includes only text)	Change the amount or type of information that is included in the CCR/annual water quality report					Newsletters (electronic or hard copy) to consumers	Information about the CCR is available on our utility’s website			Other (please describe below)		We table booths at community and neighborhood events throughout the year.	Summary or explanation about information in the CCR	Contact information for the utility	Link(s) to EPA or CDC Consumer Confidence Report information	Electronic copy of the CCR	Electronic copy of the CCR in a non-English language			Yes, we have used electronic delivery for some or all of our consumer confidence reports/ water quality reports	Not this year, but we plan to in the future				We have tracked the number of times the report has been accessed
West (Region 4)	15000					We do not track consumer engagement or understanding on the CCR/ annual water quality report						We do not track consumer perceptions on their water quality or the effect of the CCR/ annual water quality report			We address questions or concerns we have received from consumers				Change language/wording where applicable	Change format of information (e.g. placement in the report, bulleted items vs. paragraph)	Change format of figures or pictures (e.g. placement in the report, report includes pictures and diagrams vs. includes only text)	Change the amount or type of information that is included in the CCR/annual water quality report						Information about the CCR is available on our utility’s website		Social media announcements	Other (please describe below)		We have a University in town and we email the CCR to the listserv.				Electronic copy of the CCR				Yes, we have used electronic delivery for some or all of our consumer confidence reports/ water quality reports		No, and we do not plan to in the future	* You need another answer option* No, we have always included all pertinent information. No matter if it is electronic or paper.				We have not tracked or conducted testing on whether electronic delivery has changed consumer feedback, understanding, or perceptions about water quality information in the eCCR
West (Region 4)	24760	Record the number of inquiries or comments received about the CCR/annual water quality report	Record the content of inquiries or comments received about the CCR/annual water quality report									We do not track consumer perceptions on their water quality or the effect of the CCR/ annual water quality report			We address questions or concerns we have received from consumers				Change language/wording where applicable	Change format of information (e.g. placement in the report, bulleted items vs. paragraph)		Change the amount or type of information that is included in the CCR/annual water quality report					Newsletters (electronic or hard copy) to consumers	Information about the CCR is available on our utility’s website	Announcements to local media outlets like newspapers, radio, or television stations	Social media announcements				Summary or explanation about information in the CCR	Contact information for the utility	Link(s) to EPA or CDC Consumer Confidence Report information	Electronic copy of the CCR	Electronic copy of the CCR in a non-English language			Yes, we have used electronic delivery for some or all of our consumer confidence reports/ water quality reports			New info				We have not tracked or conducted testing on whether electronic delivery has changed consumer feedback, understanding, or perceptions about water quality information in the eCCR
West (Region 4)	28800					We do not track consumer engagement or understanding on the CCR/ annual water quality report						We do not track consumer perceptions on their water quality or the effect of the CCR/ annual water quality report				Other (please describe below)		Feedback from our Public Works Commission							We do not test on the language, format, or other aspects of the CCR/ annual water quality report			Information about the CCR is available on our utility’s website							Contact information for the utility		Electronic copy of the CCR				Yes, we have used electronic delivery for some or all of our consumer confidence reports/ water quality reports			Added information regarding backflow, pressure regulators, lead in drinking water (longer paragraphs).				We have not tracked or conducted testing on whether electronic delivery has changed consumer feedback, understanding, or perceptions about water quality information in the eCCR
West (Region 4)	63950	Record the number of inquiries or comments received about the CCR/annual water quality report									Other (please describe below)		As customers request a hard copy of the CCR, we note any concerns or questions they may have.		We address questions or concerns we have received from consumers				Change language/wording where applicable	Change format of information (e.g. placement in the report, bulleted items vs. paragraph)	Change format of figures or pictures (e.g. placement in the report, report includes pictures and diagrams vs. includes only text)	Change the amount or type of information that is included in the CCR/annual water quality report						Information about the CCR is available on our utility’s website			Other (please describe below)		We send a postcard to every household and business including multi-family housing stating the CCR is available and where/how they may obtain or read a copy of it.		Contact information for the utility	Link(s) to EPA or CDC Consumer Confidence Report information	Electronic copy of the CCR	Electronic copy of the CCR in a non-English language	Other (please describe below)	Our CCR is its own webpage and can be translated into 104 different languages.	Yes, we have used electronic delivery for some or all of our consumer confidence reports/ water quality reports			We produce a Spanish version of our CCR. Also, because we print copies in-house based on how many requests we receive for a hard copy, we have more flexibility to add/remove content and are not concerned about the number of pages it is. It is easier to take customer comments into account.		We have tracked the number of times the report has been accessed
West (Region 4)	64905	Record the number of inquiries or comments received about the CCR/annual water quality report	Record the content of inquiries or comments received about the CCR/annual water quality report									We do not track consumer perceptions on their water quality or the effect of the CCR/ annual water quality report					We do not use any methods to understand what information consumers would like in their CCR/ annual water quality report		Change language/wording where applicable	Change format of information (e.g. placement in the report, bulleted items vs. paragraph)	Change format of figures or pictures (e.g. placement in the report, report includes pictures and diagrams vs. includes only text)	Change the amount or type of information that is included in the CCR/annual water quality report					Newsletters (electronic or hard copy) to consumers	Information about the CCR is available on our utility’s website	Announcements to local media outlets like newspapers, radio, or television stations	Social media announcements				Summary or explanation about information in the CCR	Contact information for the utility	Link(s) to EPA or CDC Consumer Confidence Report information	Electronic copy of the CCR				Yes, we have used electronic delivery for some or all of our consumer confidence reports/ water quality reports			We have increased the amount of information in our CCR's now that EPA and the [State Regulator] allows us to utilize electronic CCR's that are available on our website. This includes information on water resources, water conservation, cross-connection-control, stormwater compliance, etc.,...		We have tracked the number of times the report has been accessed
West (Region 4)	71000					We do not track consumer engagement or understanding on the CCR/ annual water quality report						We do not track consumer perceptions on their water quality or the effect of the CCR/ annual water quality report			We address questions or concerns we have received from consumers				Change language/wording where applicable	Change format of information (e.g. placement in the report, bulleted items vs. paragraph)	Change format of figures or pictures (e.g. placement in the report, report includes pictures and diagrams vs. includes only text)	Change the amount or type of information that is included in the CCR/annual water quality report					Newsletters (electronic or hard copy) to consumers	Information about the CCR is available on our utility’s website	Announcements to local media outlets like newspapers, radio, or television stations	Social media announcements				Summary or explanation about information in the CCR	Contact information for the utility	Link(s) to EPA or CDC Consumer Confidence Report information	Electronic copy of the CCR	Electronic copy of the CCR in a non-English language			Yes, we have used electronic delivery for some or all of our consumer confidence reports/ water quality reports		No, and we do not plan to in the future			We have tracked the number of times the report has been accessed
West (Region 4)	222000					We do not track consumer engagement or understanding on the CCR/ annual water quality report						We do not track consumer perceptions on their water quality or the effect of the CCR/ annual water quality report					We do not use any methods to understand what information consumers would like in their CCR/ annual water quality report		Change language/wording where applicable	Change format of information (e.g. placement in the report, bulleted items vs. paragraph)	Change format of figures or pictures (e.g. placement in the report, report includes pictures and diagrams vs. includes only text)						Newsletters (electronic or hard copy) to consumers	Information about the CCR is available on our utility’s website		Social media announcements					Contact information for the utility		Electronic copy of the CCR				Yes, we have used electronic delivery for some or all of our consumer confidence reports/ water quality reports		No, and we do not plan to in the future					We have not tracked or conducted testing on whether electronic delivery has changed consumer feedback, understanding, or perceptions about water quality information in the eCCR
West (Region 4)	610500	Record the number of inquiries or comments received about the CCR/annual water quality report									Other (please describe below)		[Utility Name has] a customer service phone and email line that is dedicated to taking and addressing customer questions and issues related to water quality and pressure.[Utility] staff track the type of customer complaints and questions received and the topics that they discuss most with customers, and that information is used in developing thematic stories in the CCR. [Utility] staff also track…		We address questions or concerns we have received from consumers				Change language/wording where applicable	Change format of information (e.g. placement in the report, bulleted items vs. paragraph)	Change format of figures or pictures (e.g. placement in the report, report includes pictures and diagrams vs. includes only text)	Change the amount or type of information that is included in the CCR/annual water quality report					Newsletters (electronic or hard copy) to consumers	Information about the CCR is available on our utility’s website	Announcements to local media outlets like newspapers, radio, or television stations	Social media announcements	Other (please describe below)		A postcard is mailed to all addresses in our service area that announces the availability of the report with a URL to find it online, ways to request a paper copy, and translated information.	Summary or explanation about information in the CCR	Contact information for the utility	Link(s) to EPA or CDC Consumer Confidence Report information	Electronic copy of the CCR	Electronic copy of the CCR in a non-English language	Other (please describe below)	Links to past 5 reports	Yes, we have used electronic delivery for some or all of our consumer confidence reports/ water quality reports		No, and we do not plan to in the future			We have tracked the number of times the report has been accessed	Other (please describe below)		[Utility Name] staff also tracks the number of requests for paper copies
West (Region 4)	24500					We do not track consumer engagement or understanding on the CCR/ annual water quality report						We do not track consumer perceptions on their water quality or the effect of the CCR/ annual water quality report					We do not use any methods to understand what information consumers would like in their CCR/ annual water quality report								We do not test on the language, format, or other aspects of the CCR/ annual water quality report		Newsletters (electronic or hard copy) to consumers	Information about the CCR is available on our utility’s website		Social media announcements				Summary or explanation about information in the CCR	Contact information for the utility	Link(s) to EPA or CDC Consumer Confidence Report information	Electronic copy of the CCR	Electronic copy of the CCR in a non-English language			Yes, we have used electronic delivery for some or all of our consumer confidence reports/ water quality reports			we have changed the format and added some pictures that make it look more appealing and easier to read.		We have tracked the number of times the report has been accessed
West (Region 4)	25000					We do not track consumer engagement or understanding on the CCR/ annual water quality report						We do not track consumer perceptions on their water quality or the effect of the CCR/ annual water quality report					We do not use any methods to understand what information consumers would like in their CCR/ annual water quality report								We do not test on the language, format, or other aspects of the CCR/ annual water quality report			Information about the CCR is available on our utility’s website							Contact information for the utility						Yes, we have used electronic delivery for some or all of our consumer confidence reports/ water quality reports
West (Region 4)	865					We do not track consumer engagement or understanding on the CCR/ annual water quality report						We do not track consumer perceptions on their water quality or the effect of the CCR/ annual water quality report			We address questions or concerns we have received from consumers										We do not test on the language, format, or other aspects of the CCR/ annual water quality report			Information about the CCR is available on our utility’s website						Summary or explanation about information in the CCR	Contact information for the utility	Link(s) to EPA or CDC Consumer Confidence Report information	Electronic copy of the CCR				Yes, we have used electronic delivery for some or all of our consumer confidence reports/ water quality reports		No, and we do not plan to in the future					We have not tracked or conducted testing on whether electronic delivery has changed consumer feedback, understanding, or perceptions about water quality information in the eCCR
West (Region 4)	6249					We do not track consumer engagement or understanding on the CCR/ annual water quality report						We do not track consumer perceptions on their water quality or the effect of the CCR/ annual water quality report					We do not use any methods to understand what information consumers would like in their CCR/ annual water quality report								We do not test on the language, format, or other aspects of the CCR/ annual water quality report							We do not conduct publicity outreach regarding our CCR/ annual water quality report			Contact information for the utility		Electronic copy of the CCR				Yes, we have used electronic delivery for some or all of our consumer confidence reports/ water quality reports	Not this year, but we plan to in the future						We have not tracked or conducted testing on whether electronic delivery has changed consumer feedback, understanding, or perceptions about water quality information in the eCCR
West (Region 4)	8000		Record the content of inquiries or comments received about the CCR/annual water quality report									We do not track consumer perceptions on their water quality or the effect of the CCR/ annual water quality report					We do not use any methods to understand what information consumers would like in their CCR/ annual water quality report								We do not test on the language, format, or other aspects of the CCR/ annual water quality report							We do not conduct publicity outreach regarding our CCR/ annual water quality report			Contact information for the utility		Electronic copy of the CCR				Yes, we have used electronic delivery for some or all of our consumer confidence reports/ water quality reports			We added additional info regarding lead exposure and mailed the CCR's after the Flint situation.				We have not tracked or conducted testing on whether electronic delivery has changed consumer feedback, understanding, or perceptions about water quality information in the eCCR
West (Region 4)	40122	Record the number of inquiries or comments received about the CCR/annual water quality report	Record the content of inquiries or comments received about the CCR/annual water quality report									We do not track consumer perceptions on their water quality or the effect of the CCR/ annual water quality report					We do not use any methods to understand what information consumers would like in their CCR/ annual water quality report		Change language/wording where applicable	Change format of information (e.g. placement in the report, bulleted items vs. paragraph)	Change format of figures or pictures (e.g. placement in the report, report includes pictures and diagrams vs. includes only text)	Change the amount or type of information that is included in the CCR/annual water quality report					Newsletters (electronic or hard copy) to consumers	Information about the CCR is available on our utility’s website						Summary or explanation about information in the CCR	Contact information for the utility	Link(s) to EPA or CDC Consumer Confidence Report information	Electronic copy of the CCR	Electronic copy of the CCR in a non-English language			Yes, we have used electronic delivery for some or all of our consumer confidence reports/ water quality reports			We have changed from one-sheet fold out to a 12-page booklet style in 2016 and will remain with the booklet style in the near future.	We have conducted consumer surveys
West (Region 4)	240000					We do not track consumer engagement or understanding on the CCR/ annual water quality report						We do not track consumer perceptions on their water quality or the effect of the CCR/ annual water quality report			We address questions or concerns we have received from consumers										We do not test on the language, format, or other aspects of the CCR/ annual water quality report			Information about the CCR is available on our utility’s website	Announcements to local media outlets like newspapers, radio, or television stations	Social media announcements				Summary or explanation about information in the CCR	Contact information for the utility		Electronic copy of the CCR				We have not used any electronic delivery methods for our CCR delivery but plan to in the future
West (Region 4)	350000						we do not do a CCR. Our seven members as the individual members in our alliance do this for the customers. Our surveys and polling shows this is the most trusted piece of communications residents receive	Conduct consumer surveys or other methods evaluating consumer confidence in their water quality	Conduct consumer surveys or other methods evaluating specific consumer concerns about their water quality					We conduct methods, such as surveys or polls, that directly ask consumers what information they would like in their CCR/ annual water quality report	We address questions or concerns we have received from consumers												Newsletters (electronic or hard copy) to consumers	Information about the CCR is available on our utility’s website	Announcements to local media outlets like newspapers, radio, or television stations	Social media announcements				Summary or explanation about information in the CCR	Contact information for the utility		Electronic copy of the CCR	Electronic copy of the CCR in a non-English language			We had used electronic delivery for some or all of our consumer confidence reports/ water quality reports but have since stopped	Not this year, but we plan to in the future		this is being discussed among members	We have conducted consumer surveys	We have tracked the number of times the report has been accessed
West (Region 4)	57750					We do not track consumer engagement or understanding on the CCR/ annual water quality report						We do not track consumer perceptions on their water quality or the effect of the CCR/ annual water quality report			We address questions or concerns we have received from consumers																				Contact information for the utility	Link(s) to EPA or CDC Consumer Confidence Report information	Electronic copy of the CCR				Yes, we have used electronic delivery for some or all of our consumer confidence reports/ water quality reports
West (Region 4)	60000	Record the number of inquiries or comments received about the CCR/annual water quality report	Record the content of inquiries or comments received about the CCR/annual water quality report	Conduct consumer surveys or other methods that evaluate whether consumers feel they understand the information in the CCR/ annual water quality report					Conduct consumer surveys or other methods evaluating specific consumer concerns about their water quality						We address questions or concerns we have received from consumers										We do not test on the language, format, or other aspects of the CCR/ annual water quality report		Newsletters (electronic or hard copy) to consumers	Information about the CCR is available on our utility’s website	Announcements to local media outlets like newspapers, radio, or television stations	Social media announcements	Other (please describe below)		Display and other outreach during National Drinking Water Week	Summary or explanation about information in the CCR	Contact information for the utility	Link(s) to EPA or CDC Consumer Confidence Report information	Electronic copy of the CCR				Yes, we have used electronic delivery for some or all of our consumer confidence reports/ water quality reports		No, and we do not plan to in the future			We have tracked the number of times the report has been accessed
West (Region 4)	71728	Record the number of inquiries or comments received about the CCR/annual water quality report	Record the content of inquiries or comments received about the CCR/annual water quality report								Other (please describe below)		We use a customer service request system that records complaints and the actions taken to resolve the issue.		We address questions or concerns we have received from consumers	Other (please describe below)		If we receive a suggestion to add something to the annual report that is not already there, we will consider if it would be a good idea to add to any upcoming reports.							We do not test on the language, format, or other aspects of the CCR/ annual water quality report			Information about the CCR is available on our utility’s website							Contact information for the utility		Electronic copy of the CCR				Yes, we have used electronic delivery for some or all of our consumer confidence reports/ water quality reports		No, and we do not plan to in the future			We have tracked the number of times the report has been accessed
West (Region 4)	115000					We do not track consumer engagement or understanding on the CCR/ annual water quality report						We do not track consumer perceptions on their water quality or the effect of the CCR/ annual water quality report			We address questions or concerns we have received from consumers				Change language/wording where applicable	Change format of information (e.g. placement in the report, bulleted items vs. paragraph)	Change format of figures or pictures (e.g. placement in the report, report includes pictures and diagrams vs. includes only text)	Change the amount or type of information that is included in the CCR/annual water quality report					Newsletters (electronic or hard copy) to consumers	Information about the CCR is available on our utility’s website	Announcements to local media outlets like newspapers, radio, or television stations						Contact information for the utility		Electronic copy of the CCR				Yes, we have used electronic delivery for some or all of our consumer confidence reports/ water quality reports			We have added other information about system maintenance.				We have not tracked or conducted testing on whether electronic delivery has changed consumer feedback, understanding, or perceptions about water quality information in the eCCR
West (Region 4)	1400000	Record the number of inquiries or comments received about the CCR/annual water quality report	Record the content of inquiries or comments received about the CCR/annual water quality report					Conduct consumer surveys or other methods evaluating consumer confidence in their water quality							We address questions or concerns we have received from consumers				Change language/wording where applicable	Change format of information (e.g. placement in the report, bulleted items vs. paragraph)	Change format of figures or pictures (e.g. placement in the report, report includes pictures and diagrams vs. includes only text)	Change the amount or type of information that is included in the CCR/annual water quality report					Newsletters (electronic or hard copy) to consumers	Information about the CCR is available on our utility’s website	Announcements to local media outlets like newspapers, radio, or television stations	Social media announcements				Summary or explanation about information in the CCR	Contact information for the utility	Link(s) to EPA or CDC Consumer Confidence Report information	Electronic copy of the CCR				Yes, we have used electronic delivery for some or all of our consumer confidence reports/ water quality reports	Not this year, but we plan to in the future				We have tracked the number of times the report has been accessed
West (Region 4)	3500					We do not track consumer engagement or understanding on the CCR/ annual water quality report						We do not track consumer perceptions on their water quality or the effect of the CCR/ annual water quality report					We do not use any methods to understand what information consumers would like in their CCR/ annual water quality report								We do not test on the language, format, or other aspects of the CCR/ annual water quality report			Information about the CCR is available on our utility’s website							Contact information for the utility	Link(s) to EPA or CDC Consumer Confidence Report information	Electronic copy of the CCR				We had used electronic delivery for some or all of our consumer confidence reports/ water quality reports but have since stopped		No, and we do not plan to in the future					We have not tracked or conducted testing on whether electronic delivery has changed consumer feedback, understanding, or perceptions about water quality information in the eCCR
																												0.676471		37
																					0.189076															Other
Cumulative Population	48272529																				0.810924															no website	4									Other
							0.23431																													non-english	3									Category	Number
							0.21569																0.0756303	7.56303												where to obtain a ccr	1									Requests for print	2
																								92.437												any current notices; annual averages of chemical analysis	1									Email receipt software	1
				"Other (please desribe below)"																																link to past reports	1									Feedback received	1
				Category	Number																															FAQs on water quality not in the report	2									Continue to track questions	1
				Do not receive any or many questions	3																															links within the report	1									Provide electronic requested information	1
				Only track complaints	1																																									State has tracked	1
				Immediate response	1																																									Same inquiries as before	1
				Return receipts	1
				No formal tracking	2																0.28692																									Elaborate
				Google or website analytics	10																																									Category	Number
	S			Comments saved as inquiries through city website	1																																									Calls	1
				Request a paper CCR	1																																									Savings	1
				Record which customers request paper copies	4																																									Track numbers requesting hard copy	1
				Record input at public outreach	1																																									Feedback of customers saying they have looked at it online	1
				Develop FAQs to help customer service representatives	1																																									Cannot track because must be ccessible from short form url	1
				Meetings specifically for consumers to ask questions a bout the CCR	1
				Monitor social media	3
				Dedicated phone line where calls are recorded	1
				Preparing one
				"Elaborate"	11
				wholesaler	3
				general customer service	1
				rarely receive questions	3
				informally track the nature of questions when they hand out their CCR (which is sort of like a brochure)	2
				website analytics	1
				track consumer understanding and engagement generally	1
[truncated: 42 more columns]

## Sheet: List of Jurisdicitions
US Census Region	Responses from these jurisdictions are within the dataset		No responses from these jurisdicitions within the dataset
South (Region 3)	Alabama		Alaska
West (Region 4)	Arizona		District of Columbia
South (Region 3)	Arkansas		Idaho
West (Region 4)	California		Mississippi
West (Region 4)	Colorado		Montanta
Northeast (Region 1)	Connecticut		Nebraska
South (Region 3)	Delaware		Rhode Island
South (Region 3)	Florida		Vermont
South (Region 3)	Georgia		US territories other than Puerto Rico and Guam
West (Region 4)	Guam*
West (Region 4)	Hawaii
Midwest (Region 2)	Illinois
Midwest (Region 2)	Indiana
Midwest (Region 2)	Iowa
Midwest (Region 2)	Kanasa
South (Region 3)	Kentucky
South (Region 3)	Louisiana
Northeast (Region 1)	Maine
South (Region 3)	Maryland
Northeast (Region 1)	Massachusetts
Midwest (Region 2)	Michigan
Midwest (Region 2)	Minnesota
Midwest (Region 2)	Missouri
West (Region 4)	Nevada
Northeast (Region 1)	New Hampshire
Northeast (Region 1)	New Jersey
West (Region 4)	New Mexico
Northeast (Region 1)	New York
South (Region 3)	North Carolina
Midwest (Region 2)	North Dakota
Midwest (Region 2)	Ohio
South (Region 3)	Oklahoma
West (Region 4)	Oregon
Northeast (Region 1)	Pennsylvania
Northeast (Region 1)	Puerto Rico*
South (Region 3)	South Carolina
Midwest (Region 2)	South Dakota
South (Region 3)	Tennessee
South (Region 3)	Texas
West (Region 4)	Utah
South (Region 3)	Virginia
West (Region 4)	Washingotn
South (Region 3)	West Virginia
Midwest (Region 2)	Wisconsin
West (Region 4)	Wyoming
* Guam Puerto Rico ara not part of any U.S. Census Region. Their responses are included for the Census Region that corresponds to the EPA regional office that serves them.

## Sheet: Survey Question Results
																																	Question 14 - what feedback does your utility receive?						Question 16 - what portions of the CCR make it more difficult for you?						Question 17 - What additional information is offered on the CCR?
					Table 1. Distribution of survey responses utility population served				Table 2. Distribution of U.S. utility sizes by population served						Table 5. Utilities' methods for changing or testing differences in CCR language, format, or other layout aspects of the CCR				Table 5. Utilities' methods used to conduct outreach or advertise the CCR				Table _. Utilities' delivery methods of the CCR					Table _. Common misunderstandings utilities report regarding the CCR					Table _. CCR Feedback Utilities Receive from Consumers						Table _. Required Portions of the CCR that Make it Difficult for Utilitis to Communicate to Consumers						Table _. Additional (i.e. not required) information utilities include in CCRs
	Table 3. Utilities' methods used to track consumer engagement or understanding of the CCR				Utility population served	Responses number	Responses % *		Utility population served	Number of utilities	Percentage of utilities	Percentage of U.S. population served			Method of changing or testing differences in language, format, or other layout aspects	Responses number	Responses % *		Method used to conduct outreach or advertise the CCR	Responses number	Responses %*		Use of electronic delivery	Responses number	Responses % *			Type of misunderstanding or area of confusion for consumers	Responses number	Responses % *			Type of feedback	Responses number	Responses % *				Required Portion of the CCR	Responses number	Responses % *				Additional (i.e. not required) information	Responses number	Responses % *
	Method used to track consumer engagement or understanding of the CCR	Responses number	Responses % *		25-500	2	0.00833333		25-500	28346	0.55	0.02			Change language/wording where applicable	85	36		Newsletters (electronic or hard copy) to consumers	105	44		Have used electronic delivery	168	70			Difficulty interpreting whether the levels of detected contaminants are a concern	90	39			Positive feedback about information in the report	87	38				Contact information (phone number and name of the owner, operator, or designee of the utility)	2	1				An explanation of our utility treatment process	98	43
	Record the number of inquiries or comments received about the CCR	84	35		501-3,300	34	0.141667		501-3,300	13737	0.27	0.07			Change format of information	66	28		Information about the CCR is available on our utility’s website	190	80		Had used electronic delivery but have since stopped	5	2			Difficulty interpreting whether information in required statements (e.g. educational information and information to vulnerable populations) is applicable to them	48	21			Questions or concerns about water quality after reading information in the report	126	56				Information on public participation opportunities	2	1				A diagram of utility treatment process	37	16
	Record the content of inquiries or comments received about the CCR/annual water quality report	57	24		3,301-10,000	32	0.133333		3,301-10,000	4936	0.1	0.1			Change format of figures or pictures	61	26		Announcements to local media outlets like newspapers, radio, or television stations	81	34		Have not used electronic delivery but plan to	26	11			Do not understand that contaminants not listed in the report are not detected	73	32			Questions or concerns about another water quality issue not included in the report	87	38				Information about source(s) of water	11	5				A summary statement about the quality of drinking water	147	64
	Conduct consumer surveys or other methods	12	5		10,001-100,000	102	0.425		10,001-100,000	3802	0.07	0.36			Change the amount or type of information	59	25		Social media announcements	107	45		Have not used electronic delivery and do not plan to	40	17			Other	39	17			At least some of the information in the report is too technical to understand	48	21				Required definitions (i.e. MCL, MCLG, TT, AL, MRDL, MRDLG)	60	26				Information about water conservation	99	43
	Other	27	11		<100,000	69	0.2875		<100,000	419	0.01	0.46			Conduct testing on differences in at least one of these aspects	2	1		Other (please describe below)	67	28		n=239					We do not hear misunderstandings from consumers regarding information in the CCR/ annual water quality report. 38% (87)	87	38			Request for a copy of the CCR	131	58				Detected contaminants health effects language	60	26				Information about costs of water treatment	13	6
	Do not track	131	55		Total	239	0.995833		Source: US EPA. (2013). Fiscal Year 2011 Drinking Water and Ground Water Statistics (EPA 816-R-13-003). March 2013, p. 8.						Other	13	5		We do not conduct publicity outreach regarding our CCR/ annual water quality report.	38	16												We do not receive any feedback from consumers regarding the CCR/ annual water quality report.	29	13				Information on monitoring for cryptosporidium, radon, and other contaminants that may indicate a health concern (if detected)	46	20				General information to educate consumers about common water quality issues in their area	76	33
	Total respondents who answered question	238			*Remaining respondent (1) is a wholesaler that does not provide the CCR in full directly to customers										Do not change or test	132	56		Total respondents who answered question	238													Other (please specify)	29	13				Compliance with other drinking water regulations	21	9				Photos or other diagrams	102	44
	*Percentages do not add up to 100% because utilities may use more than one method to track consumer engagement or understanding																		*Percentages do not add up to 100% because utilities may use more than one method to track consumer perceptions about water quality														*Percentages do not add up to 100% because utilities may use more than one method to track consumer perceptions about water quality						Variance and exemptions (if applicable)	18	8				Other	37	16
																																							Required educational information regarding contaminants in drinking water and bottled water	36	16				No supplemental information is put in CCR	39	17
																																							Information to vulnerable populations about Cryptosporidium	33	15				*Percentages do not add up to 100% because utilities may include more than one additional source of information
	Table 4. Utilities' methods used to track consumer perceptions about their water quality																																						Statements on nitrate, arsenic, and lead (if applicable)	35	15
	Method used to track consumer engagement or understanding of the CCR	Responses number	Responses %*																																				Other requirements	26	11
	Conduct consumer surveys or other methods evaluating consumer confidence in their water quality	30	13																																				*Percentages do not add up to 100% because there are multiple requirements for the CCR
	Conduct consumer surveys or other methods evaluating specific consumer concerns about their water quality	25	11
	Conduct consumer surveys or other methods that evaluate the effect of the CCR on consumer confidence	4	2
	Other (please describe below)	35	15
	Do not track	163	68
	Total respondents who answered question	238
	*Percentages do not add up to 100% because utilities may use more than one method to track consumer perceptions about water quality
[truncated: 6 more columns]

## Sheet: By Size
Table _. Utilities' tracking of consumer perception of water quality by utility size					Table _. Utilities' tracking of consumer engagement or feedback of CCR by utility size
Utility population served	Number of utilities that perform at least one method of tracking consumer perceptions	Percentage of utilities that perform at least one method of tracking consumer perceptions			Utility population served	Number of utilities that perform at least one method of tracking consumer engagement	Percentage of utilities that perform at least one method of tracking consumer engagement
25-500	2	0			25-500	2	0
501-3,300	27	0.205882			501-3,300	20	0.411765
3,301-10,000	30	0.0625			3,301-10,000	21	0.34375
10,001-100,000	71	0.303922			10,001-100,000	49	0.519608
>100,000	32	0.536232			>100,000	17	0.753623
Table _. Utilities methods for understanding what information consumers would like in their CCR/ annual water quality report					Question 7 by size - change or conduct testing on differences in language, format, or presentation						Question 8 by size (outreach)						Question 10 by size							Question 17 by size
Utility population served	Number of utilities that perform at least one method of evaluating what consumers would like in their CCR	Percentage of utilities that evaluate what consumers woud like in their ccr			By size	% of utilities of that size that conduct at least one method of changing format, language, etc.	% of utilities that do not make any changes	# utilities that do nothing	total # utilities that size		By size	% of utilities of that size that conduct at least one method of tracking	% of utilities that do not perform any tracking	# utilities that track nothing	total # utilities that size		By size	% of utilities that deliver the CCR electronically	# utilities that send the report electronically	total # utilities that size				Question 17 (supplemental information) by size
25-500	0.5	1			25-500	0	1	2	2		25-500	0.5	0.5	1	2		25-500	0.5	1	2				By size	% of utilities of that size that include at least one additional form of information by size	% of utilities that do not include any additional information	# utilities that include no additional form of information	total # utilities that size
501-3,300	0.705882	10			501-3,300 (n=34)	0.264706	0.735294	25	34		501-3,300	0.705882	0.294118	10	34		501-3,300	0.529412	18	34				25-500	1	0	0	2
3,301-10,000	0.625	12			3,301-10,000 (n=32)	0.25	0.75	24	32		3,301-10,000	0.65625	0.34375	11	32		3,301-10,000	0.625	20	32				501-3,300	0.558824	0.441176	15	34
10,001-100,000	0.705882	30			10,001-100,000 (n=102)	0.519608	0.480392	49	102		10,001-100,000	0.862745	0.137255	14	102		10,001-100,000	0.752475	76	101				3,301-10,000	0.78125	0.21875	7	32
<100,000	0.913043	6			>100,000 (n=69)	0.652174	0.347826	24	69		<100,000	0.956522	0.0434783	3	69		<100,000	0.768116	53	69				10,001-100,000	0.978947	0.0210526	2	95
																								<100,000	1	0	0	66
																	Question 10 by size (deliver and plan to)
																	By size	% of utilities that deliver the CCR electronically	# utilities that send the report electronically	total # utilities that size
																	25-500	0.5	1	2
																	501-3,300	0.705882	24	34
																	3,301-10,000	0.71875	23	32
																	10,001-100,000	0.841584	85	101
																	<100,000	0.869565	60	69

## Sheet: By Region
Question 4 - Tracking consumer engagement
Region	% of utilities that track CCR engagement	% of utilities that do not	# utilities that do not	total # utilities that size
Region 1 (Northeast)	0.695652	0.304348	7	23
Region 2 (Midwest)	0.318182	0.681818	45	66
Region 3 (South)	0.534247	0.465753	34	73
Region 4 (West)	0.423077	0.576923	45	78
Question 5 - Tracking consumer perceptions
Region	% of utilities that track perceptions	% of utilities that do not	# utilities that do not	total # utilities that size
Region 1 (Northeast)	0.391304	0.608696	14	23
Region 2 (Midwest)	0.227273	0.772727	51	66
Region 3 (South)	0.383562	0.616438	45	73
Region 4 (West)	0.320513	0.679487	53	78
Question 6 - Evaluate what material consumers want in their CCR
Region	% of utilities that evaluate information consumers want in the CCR	% of utilities that do not	# utilities that do not	total # utilities that size
Region 1 (Northeast)	0.619048	0.380952	8	21
Region 2 (Midwest)	0.523077	0.476923	31	65
Region 3 (South)	0.561644	0.438356	32	73
Region 4 (West)	0.564103	0.435897	34	78
Question 7 - Test on or Change Aspects of CCR Language and Format
Region	% of utilities that test or change on CCR language and format	% of utilities that do not	# utilities that do not	total # utilities that size
Region 1 (Northeast)	0.454545	0.545455	12	22
Region 2 (Midwest)	0.30303	0.69697	46	66
Region 3 (South)	0.520548	0.479452	35	73
Region 4 (West)	0.493506	0.506494	39	77
Question 8 - Publicity and Outreach of the CCR
Region	% of utilities that conduct publicity or outreach of the CCR	% of utilities that do not	# utilities that do not	total # utilities that size
Region 1 (Northeast)	0.863636	0.136364	3	22
Region 2 (Midwest)	0.712121	0.287879	19	66
Region 3 (South)	0.917808	0.0821918	6	73
Region 4 (West)	0.844156	0.155844	12	77
Question 10 - eCCR Delivery
Region	% of utilities that deliver CCR electronically	# utilities that deliver electronically	total # utilities that size
Region 1 (Northeast)	0.681818	15	22
Region 2 (Midwest)	0.651515	43	66
Region 3 (South)	0.753425	55	73
Region 4 (West)	0.705128	55	78

## Sheet: "Other" Categories
	Question 4						Question 6					Question 7					Question 8						Question 11					Question 15			Question 14 - What feedback do you receive?			Question 16 - Are there portions of the report that make it more difficult?			Question 17 - What supplemental information does your utility include?
	"Other (please describe below)"		"Elaborate"				Other (please describe below)		"Elaborate"			Other (please describe below)		"Elaborate"			Other (please describe below)		"Elaborate"				Other (please describe below)					Other (please describe below)			Other (please describe below)			Other (please describe below)			Other (please describe below)
	Category	Number	Category	Number			Category	Number	Category	Number		Category	Number	Category	Number		Category	Number	Category	Number			Category	Number				Category	Number		Category	Number		Category	Number		Category	Number
	Website analytics	10	Generally do not receive many calls	5			State agency guidance (including completion by state agency, information required by state, or reccomended templates or information)	6	Add information that may be useful	1		Other language full version	4	Referenced strictness or template promoted by the regulatory authroity	3		Billing statement	29					Provided more information	43				Technical concepts or language	6		Few responses	13		Mandatory language still invokes fear or confusion due to language	7		Topical issues	6
	Record requests for paper copies	4					review other CCRs	2	aim to increase understanding of all water issues	1		Changes in format of entire document	4	Used in house staff to get input on changes	1		Posted in critical public spaces	16						Generally more detailed info	11			contaminants not in the report or unregulated	5		Complaints about the cost of the report	4		Required language length	5		Major projects	5
	Monitor social media feedback	3					track information in drinking water development	2	use website to address extra questions	1		Large font for aged customers	1	Don't change language because "directed by the EPA"	1		Postcards sent to citizens	9						Utility activities	4			"few"	3		Parameters not mentioned in the report	4		Data from previous year	2		Source water information and protection	5
	Informal tracking	3					feedback from public works commission or other city staff	2	generally don't get many inquiries	1		Table for testing frequency	1				Community events	9						Multiple systems - made report specific	3			health guidelines produced by other organizations	3		Complaints about certain contaminants (e.g. fluoride and chlorine)	2		Required language redundant (on an annual basis)	2		Backflow prevention	2
	Input at public outreah	2					Citizen participants	2	hot topics	1		Other language mandatory minimum	1				Notices to universities, schools, businesses, large apartment complexes, etc.	6						Water treatment	3			fluoride	2		Length is too long	1		Notices of violation	1		Programs the utility is involved in	2
	Return receipts on edelivery	1					Claim they are annoyed	1	Inquiries and questions received by consumers	1		Changed language from a 12th to 7th grade reading level	1				Neighborhood specific listserve/ newsletters	3						Backflow prevention, cross-connections, etc.	3			unregulated contaminants	2		Send a copy of the report as a response to water quality question	1		Difference between ppm and ppb	1		Letter from the director	2
	Immediate review	1					general feedback	1	survey showed consumers wanted more information so they increased size of the CCr	1		Change the theme of the report	1				Elected leaders	3						Source water	3			is it safe?	2		Better understand risks in terms of parts per million and parts oer billion	1		Source Water Assessment	1		Information about outreach opportunities	2
	Complaint	1					would address questions	1	Noted the staff member preparing the ccr doesn't have time to evaluate what information consumers would like	1							Eblast to subscribers	3						Lead	3			contaminant not required to be tested during current year	1		Font is too small	1		Flushing program	1		Information on other water parameters	2
	Save as customer inquiries	1					aim to balance length with state and federal requirements	1	feedback from the ccr used at public events	1							National drinking water week outreach	2						Flexibility	2			salty water	1		More negative comments with e-delivery links	1		Contaminants table	1		Flushing and irrigation	2
	General engagement	1															Project blogs	1						Conservation	2			purpose of the report	1		Questions about national issues	1		UCMR monitoring	1		Biographical information on key staff	2
	Dedicated service line for inquiries	1															Press release	1						Contaminants tested but not detected	2			unregulated contaminant monitoring rule	1		Customer service employees don't feel equipped to better explain some technical information in the report	1					General more robust or information	2
	Customer focus group/ survey in development	1															Employees	1						Maps	2			levels are an issue even if legal	1								Utility rates	1
	Develop FAQs to help customer service representatives	1															Public transit ads	1						Testing frequency table	1			taste bad = unsafe	1								Information about plant operations	1
	Meetings specifically for consumers to ask questions a bout the CCR	1																						Statistical information	1			waste of money	1								fun facts	1
	Dedicated phone line where calls are recorded	1																						Water service enhancement	1			information on contaminants not in the report	1								Secondary Water Quality parameters	1
	Total																							Tips on water (hardness, taste and odor, cloudy water, etc.)	1			information is overwhelming	1								Sodium levels	1
																							More pictures/graphics	14				AMR	1								State mandated reports	1
																							More visually appealing	10				report must mean there was something wrong	1								Information on dam inundation studies	1
																							Still aware of space or decrease	3				contaminant not on the list	1								UCMR 4 Testing Information	1
																							State prepares	2				not usually related to the report	1								Description of various water systems	1
																							Articles to address public comment	2				why isnt hardness included	1								FAQs	1
																							Make changes based on state agency feedback	1				why not zero	1								How to interpret the table	1
																												type too small	1								Online interactive map	1
																												source of water	1
																												MCL vs. PHG	1
